# Supplementary material
Source: PubMed Central journal article supplement (PMC9883075)

# Supporting Information

**Green and efficient one-pot three-component synthesis of novel drug-like furo[2,3-*d*]pyrimidines as potential active site inhibitors and putative allosteric hotspots modulators of both SARS-CoV-2 M<sup>Pro</sup> and PL<sup>Pro</sup>**

Hossein Mousavi<sup>a,\*</sup>, Behzad Zeynizadeh<sup>a</sup>, Mehdi Rimaz<sup>b</sup>

<sup>a</sup> *Department of Organic Chemistry, Faculty of Chemistry, Urmia University, Urmia, Iran*

<sup>b</sup> *Department of Chemistry, Payame Noor University, PO Box 19395-3697, Tehran, Iran*

Corresponding authors Email: [1hossein.mousavi@gmail.com](mailto:1hossein.mousavi@gmail.com)

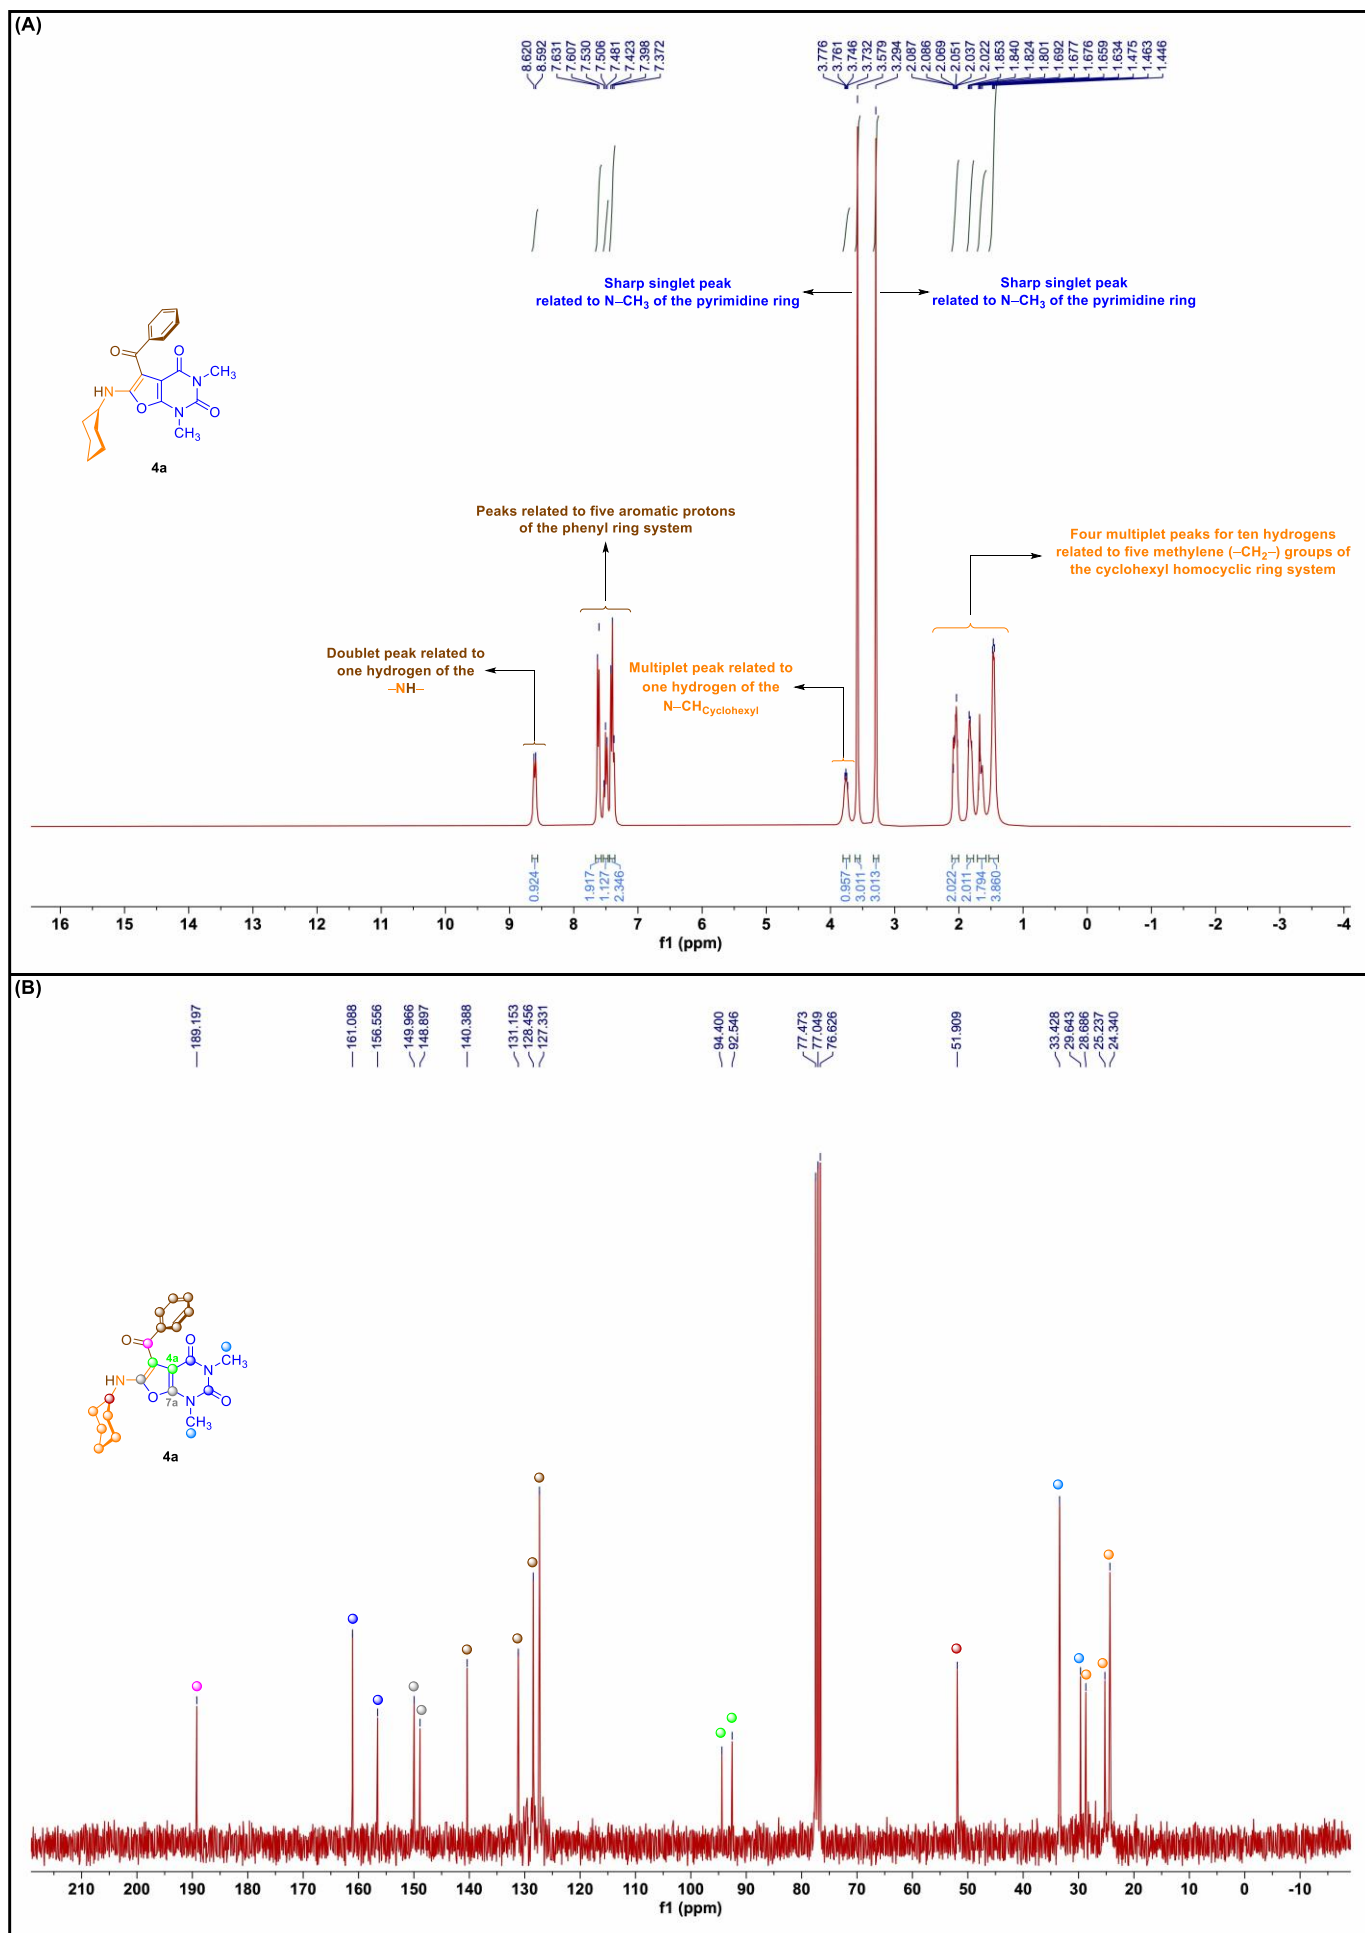

**Figure S1.** Characterized  $^1\text{H}$  NMR (A) and  $^{13}\text{C}\{^1\text{H}\}$  NMR (B) spectra of **4a**, respectively.

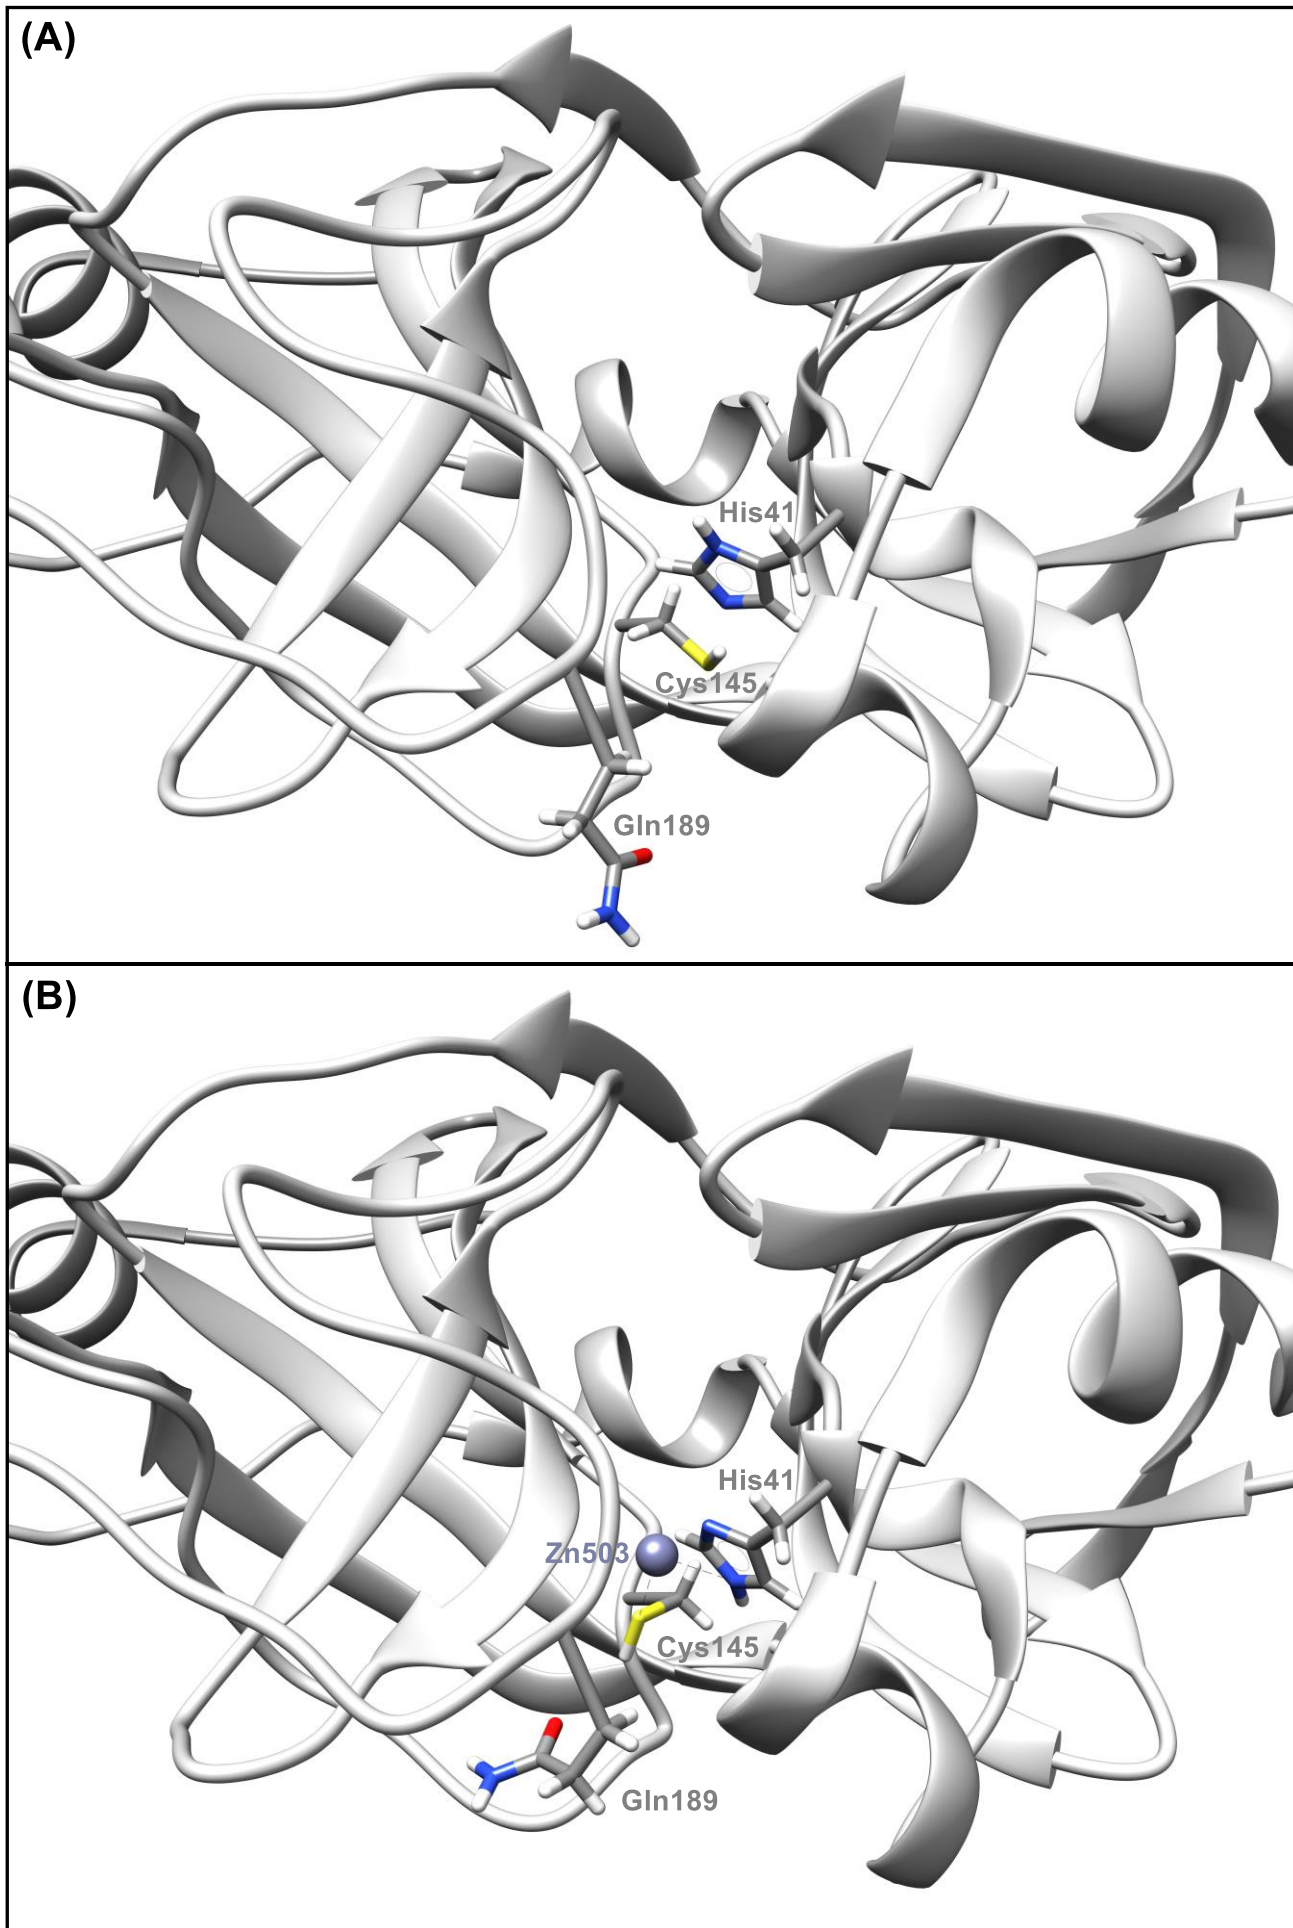

**Figure S2.** Views of the metal-free (A) and Zn<sup>II</sup>-containing (B) SARS-CoV-2 M<sup>Pro</sup> active site, respectively.

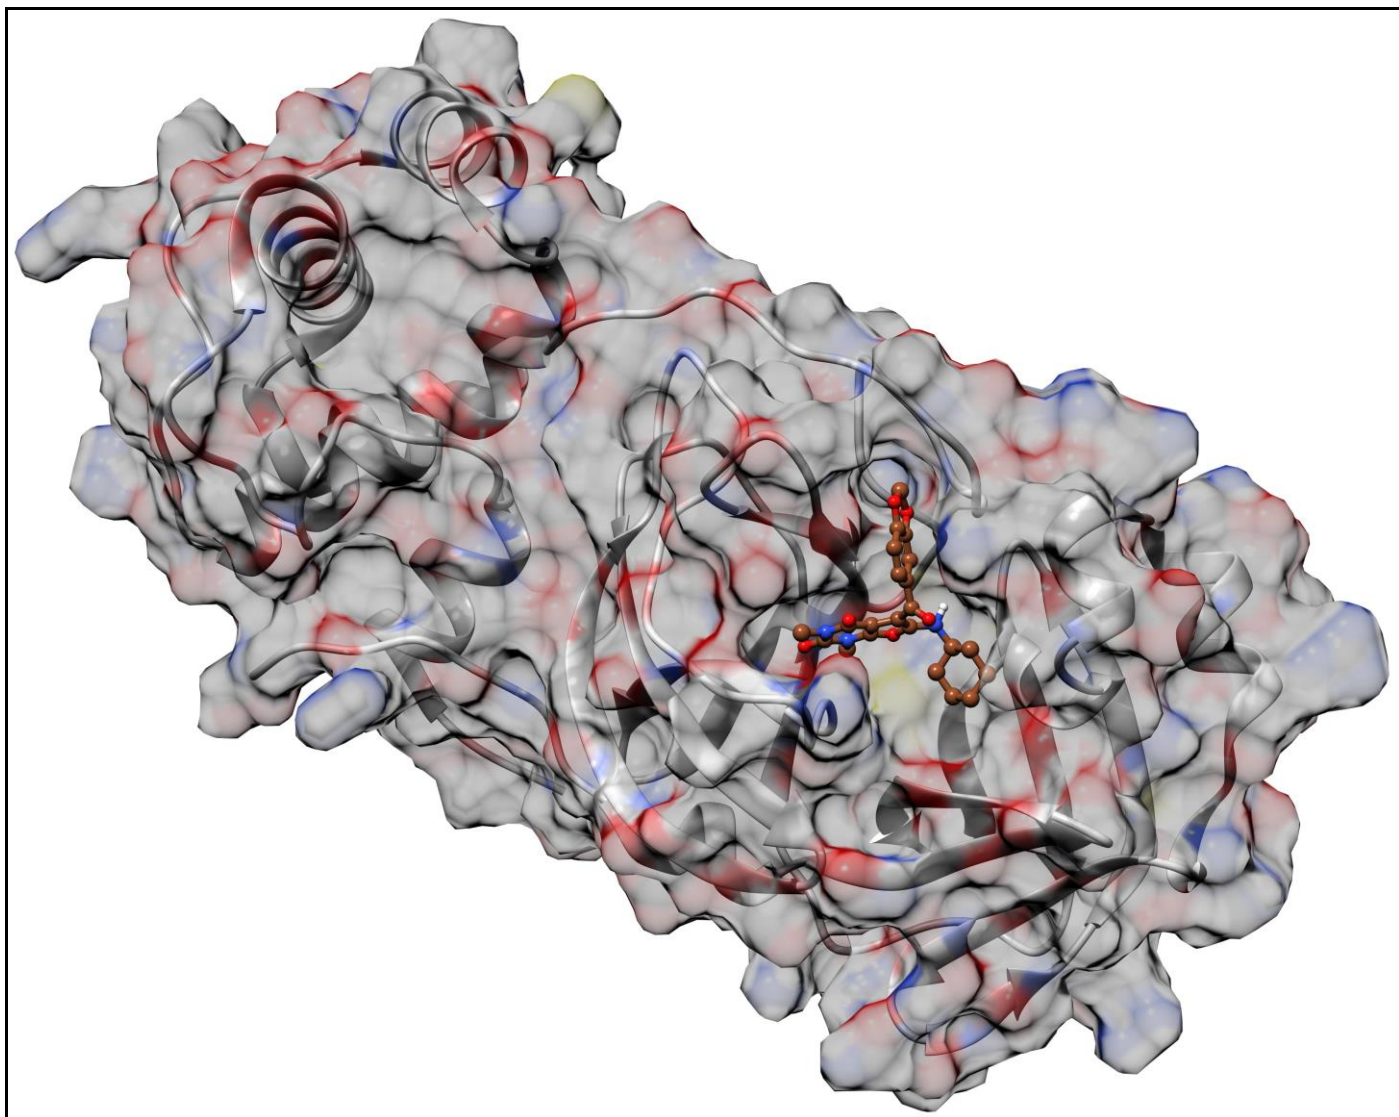

**Figure S3.** General perspective of the predicted position of **4g** in the metal-free active site of the SARS-CoV-2 M<sup>Pro</sup> (PDB ID: 7AEH).



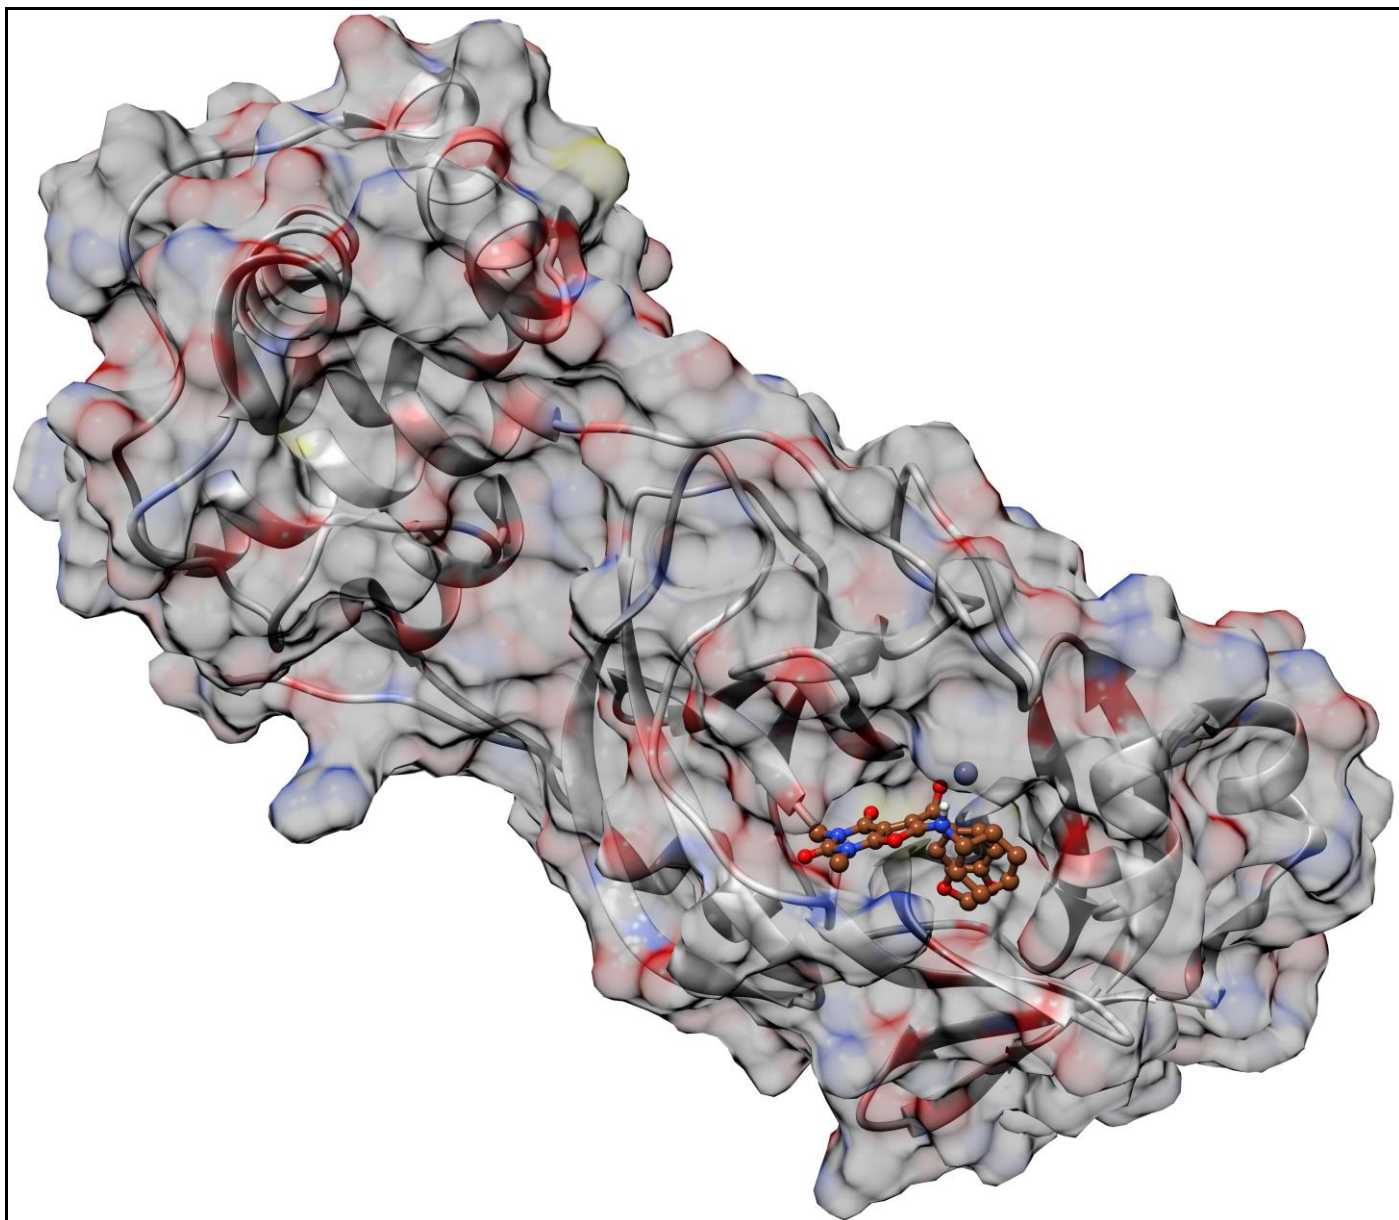

**Figure S4.** General perspective of the predicted position of **4g** in the Zn<sup>II</sup>-containing active site of the SARS-CoV-2 M<sup>Pro</sup> (PDB ID: 7MHK).

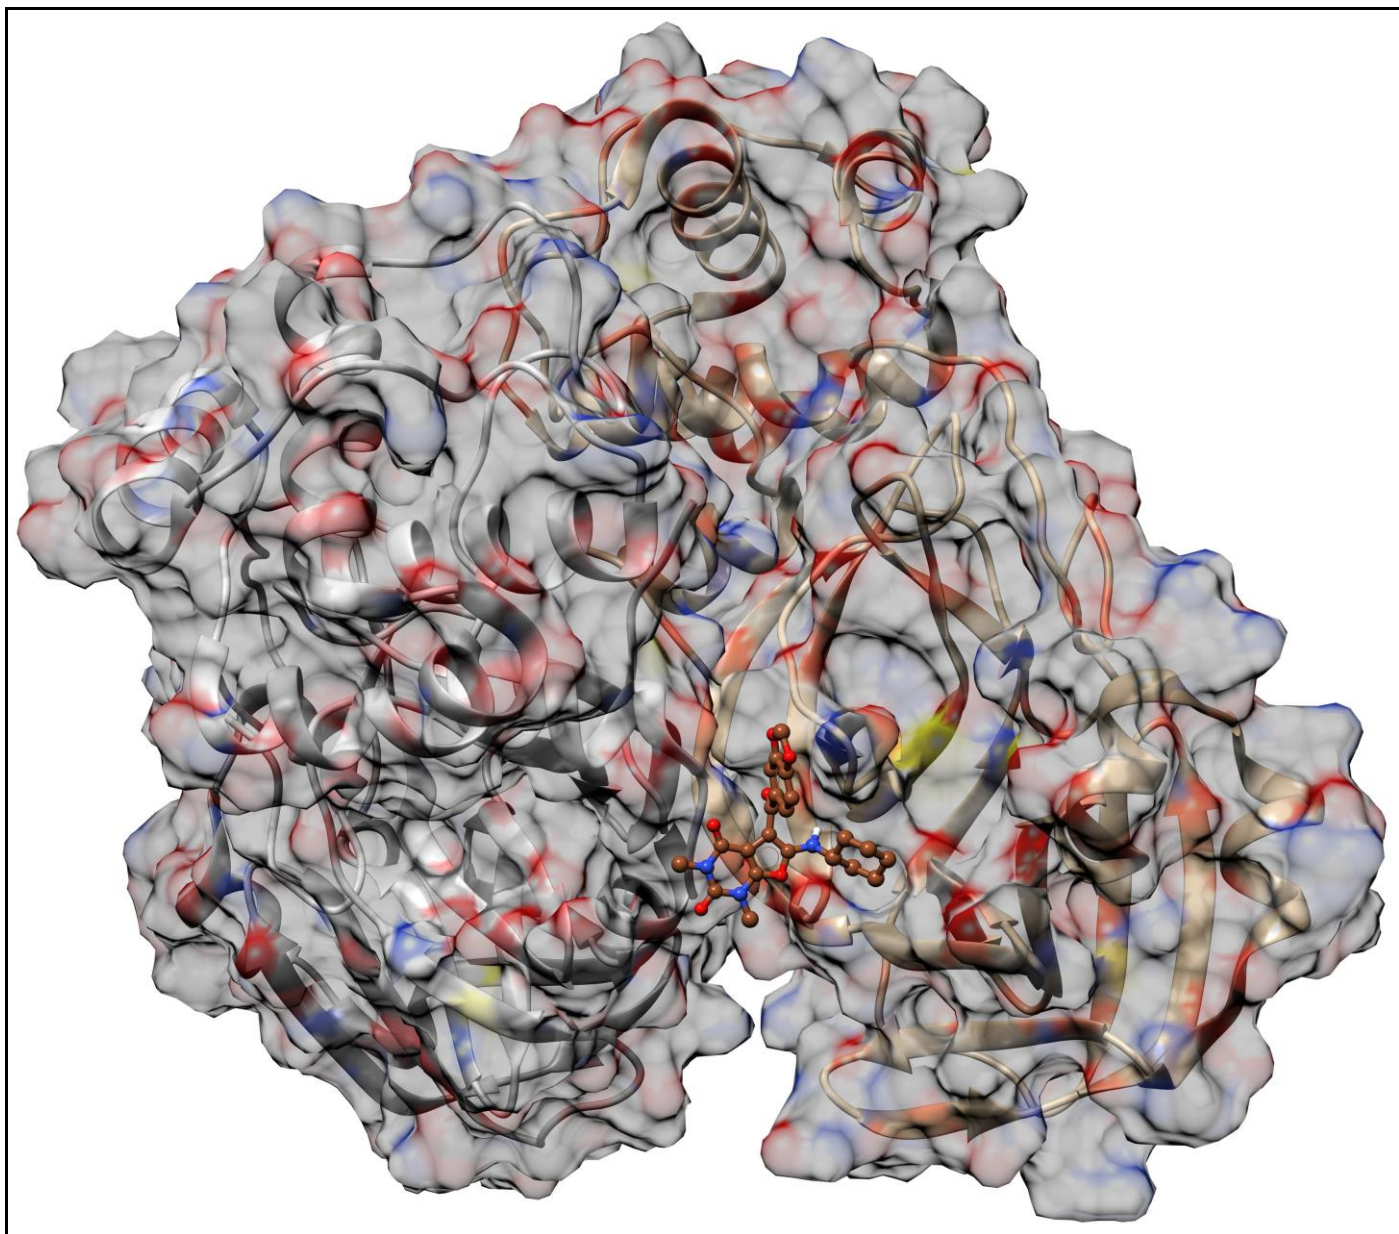

**Figure S5.** General perspective of the predicted position of **4g** in the allosteric site I (dimerization site) of the SARS-CoV-2 M<sup>Pro</sup> (PDB ID: 7VLP).



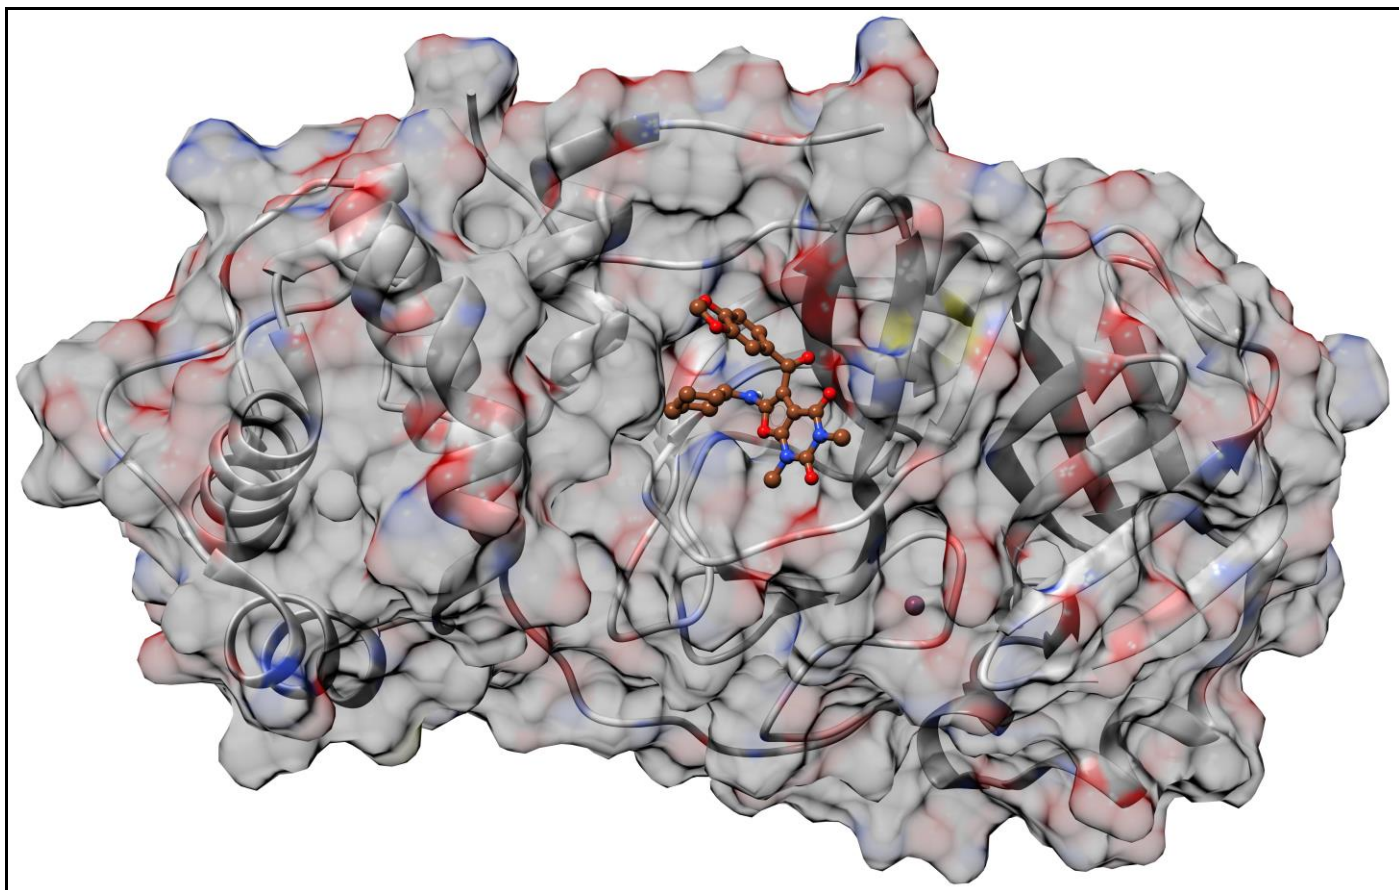

**Figure S6.** General perspective of the predicted position of **4g** in the allosteric site II (cryptic site) of the SARS-CoV-2 M<sup>Pro</sup> (PDB ID: 7MHK).

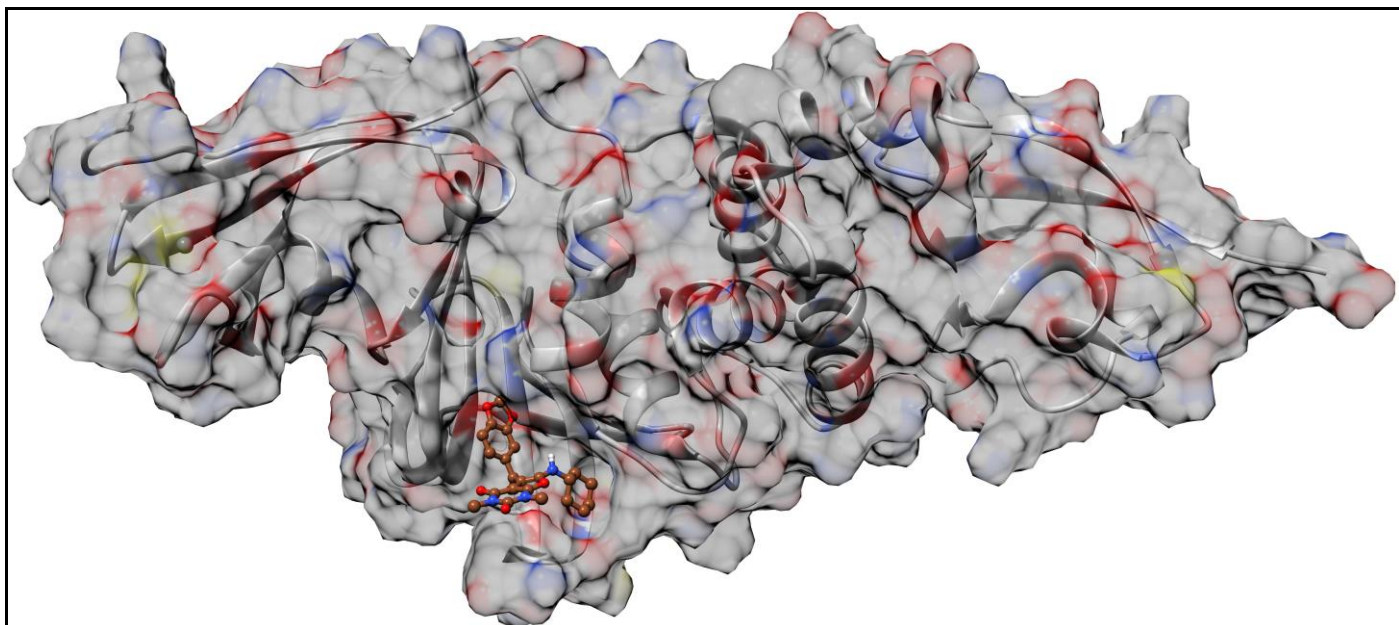

**Figure S7.** General perspective of the predicted position of **4g** in the active site of the SARS-CoV-2 PL<sup>Pro</sup> (PDB ID: 6WX4).

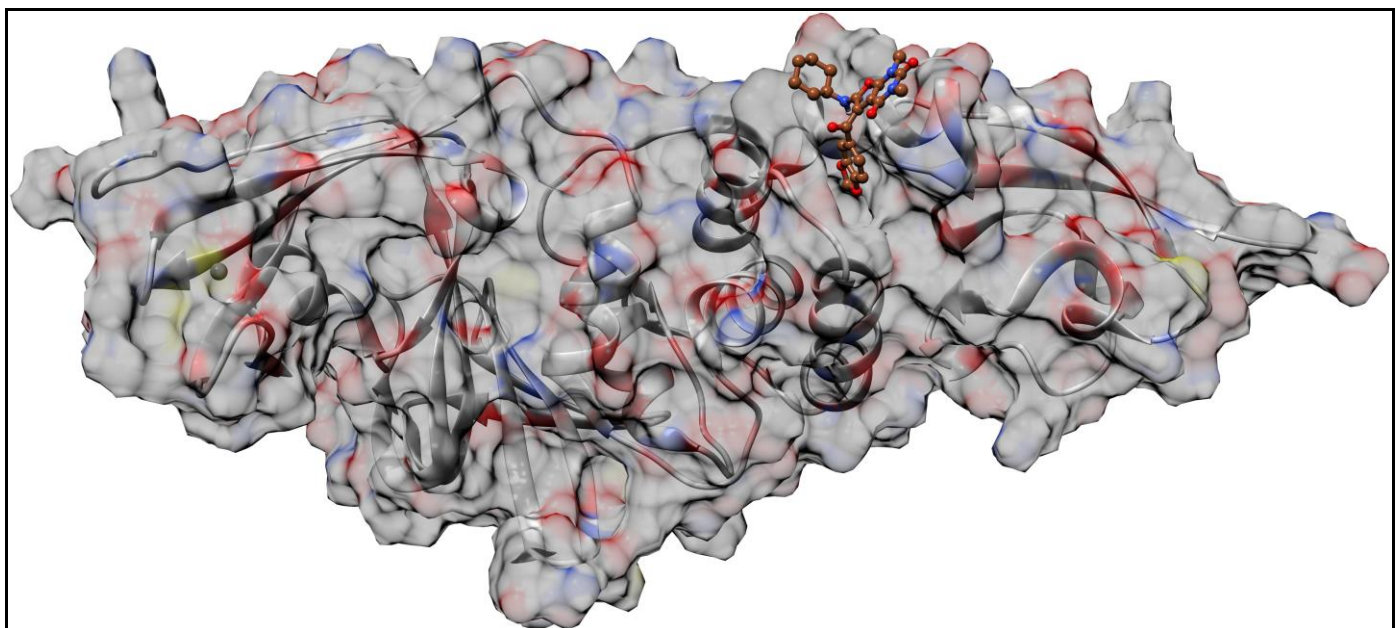

**Figure S8.** General perspective of the predicted position of **4g** in the allosteric site of the SARS-CoV-2 PL<sup>Pro</sup> (PDB ID: 6WX4).



**Table S1.** Molecular docking results related to between **4a–n** and SARS-CoV-2 M<sup>Pro</sup> metal-free active site (PDB ID: 7AEH).

| Entry | Compound | Binding energy (–Kcal/mol) | Interaction                                                                                                                                         |                                                                                                                                                                                                                                                  |
|-------|----------|----------------------------|-----------------------------------------------------------------------------------------------------------------------------------------------------|--------------------------------------------------------------------------------------------------------------------------------------------------------------------------------------------------------------------------------------------------|
|       |          |                            | Conventional hydrogen bond (number / distance)                                                                                                      | Other interactions                                                                                                                                                                                                                               |
| 1     | 4a       | –7.4                       | Thr25 (1 / 2.884 Å)<br>His41 (1 / 3.079 Å)<br>Ser46 (1 / 3.494 Å)<br>Gly143 (1 / 2.017 Å)<br>His164 (1 / 2.758 Å)                                   | His41 (Carbon hydrogen bond; $\pi$ – $\pi$ Stacked; $\pi$ –Alkyl)<br>Cys44 (Carbon hydrogen bond; Alkyl)<br>Met49 (Alkyl; $\pi$ –Sulfur)<br>Asn142 (Carbon hydrogen bond)<br>Cys145 ( $\pi$ –Alkyl)<br>Met165 (Alkyl)                            |
| 2     | 4b       | –7.7                       | Thr25 (1 / 2.906 Å)<br>His41 (1 / 3.108 Å)<br>Ser46 (1 / 3.483 Å)<br>Gly143 (1 / 1.956 Å)<br>His164 (1 / 2.786 Å)                                   | His41 ( $\pi$ – $\pi$ Stacked)<br>Cys44 (Carbon hydrogen bond; Alkyl)<br>Met49 (Alkyl; $\pi$ –Sulfur)<br>Asn142 (Carbon hydrogen bond)<br>Cys145 ( $\pi$ –Alkyl)<br>Met165 (Alkyl)                                                               |
| 3     | 4c       | –7.7                       | Thr25 (1 / 2.912 Å)<br>His41 (1 / 3.104 Å)<br>Gly143 (1 / 1.949 Å)<br>His164 (1 / 2.782 Å)                                                          | His41 ( $\pi$ – $\pi$ Stacked)<br>Cys44 (Carbon hydrogen bond; Alkyl)<br>Met49 (Alkyl; $\pi$ –Sulfur)<br>Asn142 (Carbon hydrogen bond)<br>Cys145 ( $\pi$ –Alkyl)<br>Met165 (Alkyl)                                                               |
| 4     | 4d       | –7.7                       | Thr25 (1 / 2.902 Å)<br>His41 (1 / 2.966 Å)<br>Ser46 (1 / 3.493 Å)<br>Gly143 (1 / 1.929 Å)<br>His164 (1 / 2.817 Å)                                   | His41 ( $\pi$ – $\pi$ Stacked)<br>Cys44 (Carbon hydrogen bond; Alkyl)<br>Met49 (Alkyl; $\pi$ –Sulfur)<br>Cys145 ( $\pi$ –Alkyl)<br>Met165 (Alkyl)                                                                                                |
| 5     | 4e       | –7.4                       | His41 (1 / 3.160 Å)<br>Gly143 (2 / 2.123 Å and 2.713 Å)<br>Cys145 (1 / 3.309 Å)<br>His164 (1 / 2.654 Å)                                             | His41 ( $\pi$ – $\pi$ Stacked)<br>Cys44 (Carbon hydrogen bond)<br>Met49 (Alkyl)<br>Asn142 (Carbon hydrogen bond)<br>Cys145 ( $\pi$ –Sulfur)<br>Met165 (Alkyl)                                                                                    |
| 6     | 4f       | –7.9                       | Gly143 (1 / 2.156 Å)<br>Ser144 (4 / 2.297 Å, 2.437 Å, 2.478 Å, and 2.689 Å)<br>Cys145 (1 / 2.341 Å)<br>His163 (1 / 2.144 Å)<br>Gln189 (1 / 3.020 Å) | His41 ( $\pi$ –Alkyl)<br>Met49 (Alkyl)<br>Cys145 ( $\pi$ –Alkyl)<br>His163 ( $\pi$ –Alkyl)<br>Met165 (Carbon hydrogen bond)<br>Gln166 (Carbon hydrogen bond)<br>His172 ( $\pi$ –Alkyl)                                                           |
| 7     | 4g       | –8.5                       | Ser144 (1 / 2.625 Å)<br>His163 (1 / 2.415 Å)                                                                                                        | His41 ( $\pi$ –Alkyl)<br>Met49 (Alkyl)<br>Cys145 (Alkyl; $\pi$ –Alkyl)<br>His163 ( $\pi$ –Alkyl)<br>His164 (Carbon hydrogen bond)<br>Pro168 ( $\pi$ –Alkyl)<br>Gln189 (Carbon hydrogen bond; $\pi$ – $\sigma$ )<br>Thr190 (Carbon hydrogen bond) |
| 8     | 4h       | –6.9                       | Gly143 (1 / 2.286 Å)<br>Cys145 (1 / 3.259 Å)<br>Gln189 (1 / 2.952 Å)                                                                                | His41 (Carbon hydrogen bond; $\pi$ –Alkyl)<br>Met49 (Alkyl)<br>Asn142 (Carbon hydrogen bond)<br>Cys145 ( $\pi$ –Alkyl)<br>Met165 (Alkyl)                                                                                                         |

**Table S1.** Continued.

| Entry | Compound | Binding energy (-Kcal/mol) | Interaction                                                                                                                                  |                                                                                                                                                                                                                                 |
|-------|----------|----------------------------|----------------------------------------------------------------------------------------------------------------------------------------------|---------------------------------------------------------------------------------------------------------------------------------------------------------------------------------------------------------------------------------|
|       |          |                            | Conventional hydrogen bond<br>(number / distance)                                                                                            | Other interactions                                                                                                                                                                                                              |
| 9     | 4i       | -7.2                       | Ser144 (1 / 2.504 Å)<br>His163 (1 / 2.340 Å)                                                                                                 | Met49 (Alkyl)<br>Cys145 (Alkyl)<br>His163 ( $\pi$ -Alkyl)<br>His164 (Carbon hydrogen bond)<br>Pro168 (Alkyl)                                                                                                                    |
| 10    | 4j       | -7.2                       | Ser144 (1 / 2.490 Å)<br>His163 (1 / 2.377 Å)                                                                                                 | Met49 (Alkyl)<br>Cys145 (Alkyl)<br>His163 ( $\pi$ -Alkyl)<br>His164 (Carbon hydrogen bond)<br>Pro168 (Alkyl)                                                                                                                    |
| 11    | 4k       | -7.2                       | Gly143 (1 / 2.193 Å)<br>Ser144 (1 / 3.251 Å)<br>His163 (1 / 2.221 Å)<br>Gln189 (1 / 3.045 Å)                                                 | His41 (Carbon hydrogen bond; $\pi$ -Alkyl)<br>Met49 (Alkyl)<br>Leu141 (Amide- $\pi$ stacked)<br>Asn142 (Carbon hydrogen bond)<br>Cys145 (Alkyl; $\pi$ -Alkyl)<br>His163 (Halogen {F})<br>Met165 (Alkyl)<br>Glu166 (Halogen {F}) |
| 12    | 4l       | -7.2                       | Ser144 (1 / 2.342 Å)<br>His163 (1 / 2.293 Å)<br>Glu166 (1 / 3.044 Å)                                                                         | Met49 (Alkyl)<br>Cys145 (Alkyl)<br>His163 ( $\pi$ -Alkyl)<br>His164 (Carbon hydrogen bond)<br>Glu166 (Carbon hydrogen bond; $\pi$ -Donor hydrogen bond)<br>Pro168 (Alkyl; $\pi$ -Alkyl)                                         |
| 13    | 4m       | -7.3                       | Gly143 (1 / 2.730 Å)<br>Ser144 (2 / 2.889 Å and 3.371 Å)<br>His163 (2 / 2.349 Å and 3.027 Å)<br>Glu166 (1 / 2.146 Å)<br>Gln189 (1 / 2.779 Å) | His41 (Carbon hydrogen bond; $\pi$ - $\sigma$ )<br>Met49 (Alkyl)<br>Asn142 (Carbon hydrogen bond)<br>Cys145 (Alkyl; $\pi$ -Alkyl)<br>His163 ( $\pi$ -Alkyl)<br>His164 (Carbon hydrogen bond)<br>Met165 (Alkyl)                  |
| 14    | 4n       | -7.5                       | Ser144 (1 / 2.547 Å)<br>His163 (1 / 2.329 Å)                                                                                                 | Met49 (Alkyl)<br>Cys145 (Alkyl)<br>His163 ( $\pi$ -Alkyl)<br>His164 (Carbon hydrogen bond)<br>Gln189 ( $\pi$ - $\sigma$ )<br>Thr190 (Carbon hydrogen bond)                                                                      |

**Table S2.** Molecular docking results between **4a–n** and SARS-CoV-2 M<sup>Pro</sup> Zn<sup>II</sup>-containing active site (PDB ID: 7MHK).

| Entry | Compound | Binding energy (–Kcal/mol) | Interaction                                                                                                                                                                           |                                                                                                                                                                                                                                                                                                     |
|-------|----------|----------------------------|---------------------------------------------------------------------------------------------------------------------------------------------------------------------------------------|-----------------------------------------------------------------------------------------------------------------------------------------------------------------------------------------------------------------------------------------------------------------------------------------------------|
|       |          |                            | Conventional hydrogen bond<br>(number / distance)                                                                                                                                     | Other interactions                                                                                                                                                                                                                                                                                  |
| 1     | 4a       | –7.2                       | His41 (1 / 3.369 Å)<br>Gln189 (1 / 2.192 Å)                                                                                                                                           | Thr26 (Carbon hydrogen bond)<br>Ser46 (Carbon hydrogen bond)<br>Met49 ( $\pi$ -Alkyl)<br>Cys145 ( $\pi$ -Alkyl; $\pi$ -Sulfur)<br>Met165 (Carbon hydrogen bond)<br>Zn503 (Metal-acceptor)                                                                                                           |
| 2     | 4b       | –7.2                       | His41 (1 / 3.433 Å)<br>Gly143 (1 / 2.709 Å)<br>Cys145 (2 / 2.401 Å and 3.239 Å)<br>Glu166 (3 / 2.757 Å, 2.880 Å, and 3.253 Å)                                                         | Leu27 (Alkyl)<br>His41 (Carbon hydrogen bond; $\pi$ -Alkyl)<br>Met49 (Alkyl)<br>Leu141 (Amide- $\pi$ stacked; Alkyl)<br>Asn142 (Carbon hydrogen bond)<br>Cys145 (Alkyl; $\pi$ -Alkyl)<br>Met165 (Carbon hydrogen bond)<br>Glu166 ( $\pi$ -Anion)<br>Zn503 ( $\pi$ -Cation)                          |
| 3     | 4c       | –7.2                       | Gly143 (1 / 2.659 Å)<br>Cys145 (2 / 2.404 Å, 3.150 Å, and 3.186 Å)<br>His163 (1 / 3.309 Å)<br>Glu166 (3 / 2.794 Å, 2.904 Å, and 3.327 Å)<br>Gln189 (1 / 3.332 Å)                      | Thr26 (Carbon hydrogen bond)<br>Leu27 (Alkyl)<br>His41 (Carbon hydrogen bond; $\pi$ -Alkyl)<br>Met49 (Alkyl)<br>Leu141 (Amide- $\pi$ stacked)<br>Asn142 (Carbon hydrogen bond)<br>Cys145 (Alkyl; $\pi$ -Alkyl)<br>Met165 (Carbon hydrogen bond)<br>Glu166 ( $\pi$ -Anion)<br>Zn503 ( $\pi$ -Cation) |
| 4     | 4d       | –7.1                       | His41 (1 / 2.821 Å)<br>Ser144 (1 / 3.409 Å)<br>Cys145 (1 / 3.372 Å)<br>Gln189 (1 / 2.355 Å)                                                                                           | Thr26 (Carbon hydrogen bond)<br>Leu27 (Alkyl)<br>His41 ( $\pi$ -Alkyl)<br>Ser46 (Carbon hydrogen bond)<br>Met49 ( $\pi$ -Alkyl)<br>Phe140 (Halogen {F})<br>Leu141 (Halogen {F})<br>Cys145 ( $\pi$ -Alkyl; $\pi$ -Sulfur)<br>Met165 (Carbon hydrogen bond)<br>Zn503 (Metal-acceptor)                 |
| 5     | 4e       | –7.6                       | His41 (1 / 3.353 Å)<br>Cys145 (1 / 3.458 Å)                                                                                                                                           | Thr26 (Carbon hydrogen bond)<br>Leu27 (Alkyl)<br>Ser46 (Carbon hydrogen bond)<br>Met49 (Alkyl; $\pi$ -Alkyl)<br>Glu166 ( $\pi$ -Donor hydrogen bond)<br>Zn503 (Metal-acceptor)                                                                                                                      |
| 6     | 4f       | –7.4                       | Leu141 (1 / 3.063 Å)<br>Gly143 (2 / 2.332 Å and 3.122 Å)<br>Ser144 (4 / 2.491 Å, 2.645 Å, 2.780 Å, and 3.305 Å)<br>Cys145 (3 / 2.470 Å, 2.830 Å, and 3.128 Å)<br>His163 (1 / 2.479 Å) | Met49 (Alkyl)<br>Phe140 (Carbon hydrogen bond)<br>Cys145 ( $\pi$ -Sulfur)<br>His163 ( $\pi$ -Alkyl)<br>Glu166 (Carbon hydrogen bond)<br>Zn503 (Metal-acceptor)                                                                                                                                      |
| 7     | 4g       | –7.7                       | His41 (1 / 3.165 Å)<br>Cys145 (1 / 3.099 Å)<br>Glu166 (1 / 2.809 Å)<br>Gln189 (2 / 2.532 Å and 2.890 Å)                                                                               | Met49 (Alkyl; $\pi$ -Alkyl)<br>Phe140 (Carbon hydrogen bond)<br>Leu141 (Carbon hydrogen bond)<br>Cys145 ( $\pi$ -Alkyl)<br>His163 ( $\pi$ -Alkyl)<br>Met165 (Carbon hydrogen bond)<br>Zn503 ( $\pi$ -Cation)                                                                                        |



Table S2. Continued.

| Entry | Compound | Binding energy (-Kcal/mol) | Interaction                                                                                                                                |                                                                                                                                                                                                                                                                                       |
|-------|----------|----------------------------|--------------------------------------------------------------------------------------------------------------------------------------------|---------------------------------------------------------------------------------------------------------------------------------------------------------------------------------------------------------------------------------------------------------------------------------------|
|       |          |                            | Conventional hydrogen bond<br>(number / distance)                                                                                          | Other interactions                                                                                                                                                                                                                                                                    |
| 8     | 4h       | -6.5                       | Cys145 (1 / 3.044 Å)                                                                                                                       | Thr26 (Carbon hydrogen bond)<br>Ser46 (Carbon hydrogen bond)<br>Met49 ( $\pi$ -Alkyl)<br>Asn142 (Carbon hydrogen bond)<br>Cys145 (Alkyl; $\pi$ -Alkyl)                                                                                                                                |
| 9     | 4i       | -6.6                       | Thr24 (1 / 2.113 Å)<br>Thr25 (1 / 3.115 Å)<br>Thr26 (1 / 2.023 Å)<br>Gly143 (1 / 3.007 Å)                                                  | Thr26 (Carbon hydrogen bond)<br>His41 ( $\pi$ -Alkyl)<br>Thr45 (Carbon hydrogen bond)<br>Met49 (Alkyl)<br>Asn142 (Amide- $\pi$ stacked)<br>Gly143 (Carbon hydrogen bond)<br>Cys145 (Alkyl)                                                                                            |
| 10    | 4j       | -6.6                       | Thr24 (1 / 2.056 Å)<br>Thr25 (1 / 3.124 Å)<br>Thr26 (1 / 1.986 Å)<br>Gly143 (1 / 3.061 Å)                                                  | Thr25 (Carbon hydrogen bond)<br>Thr26 (Carbon hydrogen bond)<br>His41 ( $\pi$ -Alkyl)<br>Thr45 (Carbon hydrogen bond)<br>Met49 (Alkyl)<br>Asn142 (Amide- $\pi$ stacked)<br>Gly143 (Carbon hydrogen bond)<br>Cys145 (Alkyl)                                                            |
| 11    | 4k       | -6.8                       | Cys145 (1 / 3.064 Å)<br>His164 (1 / 3.389 Å)                                                                                               | Thr26 (Carbon hydrogen bond)<br>Ser46 (Carbon hydrogen bond)<br>Met49 ( $\pi$ -Alkyl)<br>Asn142 (Carbon hydrogen bond)<br>Cys145 (Alkyl; $\pi$ -Alkyl)                                                                                                                                |
| 12    | 4l       | -6.7                       | His41 (1 / 3.194 Å)<br>Gly143 (1 / 3.479 Å)<br>Cys145 (1 / 2.810 Å)<br>Glu166 (1 / 3.097 Å)<br>Gln189 (2 / 2.180 Å and 3.210 Å)            | Leu27 (Alkyl)<br>His41 ( $\pi$ -Alkyl)<br>Met49 ( $\pi$ -Alkyl)<br>Phe140 (Carbon hydrogen bond)<br>Leu141 (Carbon hydrogen bond)<br>Cys145 (Alkyl; $\pi$ -Alkyl; $\pi$ -Sulfur)<br>His163 ( $\pi$ -Alkyl)<br>Met165 (Carbon hydrogen bond)<br>Zn503 ( $\pi$ -Cation; Metal-acceptor) |
| 13    | 4m       | -7.2                       | Phe140 (1 / 2.267 Å)<br>Leu141 (1 / 2.965 Å)<br>Asn142 (3 / 2.303 Å, 3.205 Å, and 3.390 Å)<br>Ser144 (1 / 2.764 Å)<br>His163 (1 / 2.470 Å) | Leu27 (Alkyl)<br>His41 ( $\pi$ -Alkyl)<br>Ser46 (Carbon hydrogen bond)<br>Asn142 ( $\pi$ -Donor hydrogen bond)<br>Cys145 ( $\pi$ -Alkyl)                                                                                                                                              |
| 14    | 4n       | -7.4                       | Thr25 (1 / 2.687 Å)<br>His41 (1 / 2.363 Å)<br>Ser46 (1 / 2.952 Å)<br>Cys145 (2 / 3.079 Å and 3.391 Å)                                      | His41 ( $\pi$ -Alkyl)<br>Thr45 (Carbon hydrogen bond; Amide- $\pi$ stacked)<br>Ser46 (van der Waals)<br>Met49 ( $\pi$ -Alkyl)<br>Leu141 (Carbon hydrogen bond)<br>Cys145 (Alkyl; $\pi$ -Alkyl)                                                                                        |

**Table S3.** Molecular docking results between **4a–n** and SARS-CoV-2 M<sup>Pro</sup> allosteric site I (PDB ID: 7VLP).

| Entry | Compound | Binding energy (-Kcal/mol) | Interaction                                                                                                              |                                                                                                                                                                    |
|-------|----------|----------------------------|--------------------------------------------------------------------------------------------------------------------------|--------------------------------------------------------------------------------------------------------------------------------------------------------------------|
|       |          |                            | Conventional hydrogen bond<br>(number / distance)                                                                        | Other interactions                                                                                                                                                 |
| 1     | 4a       | -6.1                       | Gly302A (2 / 2.095 Å and 2.912 Å)<br>Asn142B (1 / 2.392 Å)                                                               | Gly302A (Carbon hydrogen bond)<br>Asn142B ( $\pi$ -Donor hydrogen bond; $\pi$ - $\sigma$ )                                                                         |
| 2     | 4b       | -6                         | Gly302A (2 / 2.113 Å and 2.957 Å)<br>Asn142B (2 / 2.629 Å and 2.848 Å)                                                   | Gly302A (Carbon hydrogen bond)<br>Asn142B ( $\pi$ - $\sigma$ )                                                                                                     |
| 3     | 4c       | -6.1                       | Gly302A (2 / 2.112 Å and 2.939 Å)<br>Asn142B (2 / 2.615 Å and 2.705 Å)                                                   | Gly302A (Carbon hydrogen bond)<br>Asn142B ( $\pi$ - $\sigma$ )                                                                                                     |
| 4     | 4d       | -6.1                       | Gly302A (2 / 2.102 Å and 2.941 Å)<br>Asn142B (2 / 2.552 Å and 2.614 Å)                                                   | Gly302A (Carbon hydrogen bond)<br>Asn142B ( $\pi$ - $\sigma$ )                                                                                                     |
| 5     | 4e       | -6                         | Gly302A (2 / 2.098 Å and 2.912 Å)<br>Asn142B (2 / 2.412 Å, 3.225 Å, and 3.442 Å)                                         | Gly302A (Carbon hydrogen bond)<br>Asn141B (Alkyl; $\pi$ -Alkyl)<br>Asn142B ( $\pi$ - $\sigma$ )                                                                    |
| 6     | 4f       | -6.3                       | Gly302A (2 / 2.193 Å and 2.893 Å)<br>Asn142B (2 / 2.294 Å, 2.336 Å, 2.763 Å, and 3.319 Å)                                | Gly302A (Carbon hydrogen bond)<br>Asn141B (Alkyl)<br>Asn142B ( $\pi$ - $\sigma$ )                                                                                  |
| 7     | 4g       | -6.4                       | Gly302A (2 / 2.065 Å and 2.922 Å)<br>Asn142B (2 / 2.179 Å, 2.398 Å, and 3.379 Å)                                         | Gly302A (Carbon hydrogen bond)<br>Asn142B ( $\pi$ - $\sigma$ )                                                                                                     |
| 8     | 4h       | -5.3                       | Tyr154A (2 / 2.032 Å and 3.112 Å)                                                                                        | Val297A (Alkyl)<br>Arg298A ( $\pi$ -Alkyl)<br>Val303A ( $\pi$ - $\sigma$ ; $\pi$ -Alkyl)                                                                           |
| 9     | 4i       | -5.8                       | Gly302A (2 / 2.022 Å and 3.166 Å)<br>Val303A (1 / 2.994 Å)<br>Thr304A (2 / 2.198 Å and 2.820 Å)<br>Ser121B (1 / 3.252 Å) | Val303A (Alkyl)<br>Tyr118B ( $\pi$ -Alkyl)<br>Leu141B (Alkyl)                                                                                                      |
| 10    | 4j       | -5.8                       | Gly302A (2 / 2.042 Å and 3.141 Å)<br>Val303A (1 / 3.055 Å)<br>Thr304A (2 / 2.252 Å and 2.730 Å)<br>Ser121B (1 / 3.269 Å) | Val303A (Alkyl)<br>Thr304A (Carbon hydrogen bond)<br>Tyr118B ( $\pi$ -Alkyl)<br>Leu141B (Alkyl)                                                                    |
| 11    | 4k       | -5.6                       | Tyr154A (2 / 2.108 Å and 3.127 Å)                                                                                        | Val297A (Alkyl)<br>Arg298A ( $\pi$ -Alkyl)<br>Val303A ( $\pi$ - $\sigma$ ; $\pi$ -Alkyl)                                                                           |
| 12    | 4l       | -5.6                       | Tyr154A (2 / 1.993 Å and 3.087 Å)                                                                                        | Val297A (Alkyl)<br>Arg298A ( $\pi$ -Alkyl)<br>Val303A (Alkyl; $\pi$ - $\sigma$ ; $\pi$ -Alkyl)                                                                     |
| 13    | 4m       | -5.5                       | Tyr154A (2 / 2.022 Å and 3.116 Å)                                                                                        | Asp153A (Carbon hydrogen bond)<br>Val297A (Alkyl)<br>Arg298A ( $\pi$ -Alkyl)<br>Gly302A (Carbon hydrogen bond)<br>Val303A (Alkyl; $\pi$ - $\sigma$ ; $\pi$ -Alkyl) |
| 14    | 4n       | -5.9                       | Tyr154A (2 / 1.974 Å and 3.080 Å)                                                                                        | Ile152A (Carbon hydrogen bond)<br>Val297A (Alkyl)<br>Arg298A ( $\pi$ -Alkyl)<br>Gly302A (Carbon hydrogen bond)<br>Val303A (Alkyl; $\pi$ - $\sigma$ ; $\pi$ -Alkyl) |

**Table S4.** Molecular docking results between **4a–n** and SARS-CoV-2 M<sup>Pro</sup> allosteric site II (PDB ID: 7MHK).

| Entry | Compound | Binding energy (-Kcal/mol) | Interaction                                                                                                                                                                                       |                                                                                                                                                                                                                                                                    |
|-------|----------|----------------------------|---------------------------------------------------------------------------------------------------------------------------------------------------------------------------------------------------|--------------------------------------------------------------------------------------------------------------------------------------------------------------------------------------------------------------------------------------------------------------------|
|       |          |                            | Conventional hydrogen bond (number / distance)                                                                                                                                                    | Other interactions                                                                                                                                                                                                                                                 |
| 1     | 4a       | -7.8                       | Gly109 (1 / 2.425 Å)<br>Gln110 (1 / 2.918 Å)<br>His246 (2 / 2.956 Å and 3.197 Å)                                                                                                                  | Ile200 (Alkyl)<br>Val202 (Alkyl; $\pi$ -Alkyl)<br>Asn203 (Carbon hydrogen bond)<br>His246 ( $\pi$ - $\pi$ T-Shaped; $\pi$ -Alkyl)<br>Ile249 (Alkyl; $\pi$ -Alkyl)<br>Pro293 (Alkyl)                                                                                |
| 2     | 4b       | -7.5                       | His246 (3 / 3.253 Å, 3.280 Å, and 3.349 Å)                                                                                                                                                        | Pro108 (Alkyl; $\pi$ -Alkyl)<br>Ile200 (Alkyl)<br>Val202 (Alkyl)<br>Pro293 (Alkyl)<br>Phe294 ( $\pi$ -Alkyl)                                                                                                                                                       |
| 3     | 4c       | -7.5                       | Gln107 (1 / 3.066 Å)<br>Gln110 (1 / 3.450 Å)<br>His246 (3 / 3.223 Å, 3.266 Å, and 3.329 Å)                                                                                                        | Pro108 (Alkyl; $\pi$ -Alkyl)<br>Ile200 (Alkyl)<br>Val202 (Alkyl)<br>Pro293 (Alkyl)                                                                                                                                                                                 |
| 4     | 4d       | -7.8                       | Gly109 (1 / 2.570 Å)<br>His246 (2 / 3.021 Å and 3.130 Å)                                                                                                                                          | Ile200 (Alkyl)<br>Val202 (Alkyl; $\pi$ -Alkyl)<br>Asn203 (Carbon hydrogen bond)<br>His246 ( $\pi$ - $\pi$ T-Shaped; $\pi$ -Alkyl)<br>Ile249 (Alkyl; $\pi$ -Alkyl)<br>Pro293 (Alkyl)                                                                                |
| 5     | 4e       | -7.7                       | His246 (2 / 2.487 Å and 3.389 Å)                                                                                                                                                                  | Pro108 (Alkyl; $\pi$ -Alkyl)<br>Pro132 (Alkyl)<br>Ile200 (Alkyl)<br>Val202 (Alkyl; $\pi$ -Alkyl)<br>His246 ( $\pi$ - $\pi$ T-Shaped)<br>Ile249 (Alkyl; $\pi$ -Alkyl)<br>Pro293 (Alkyl)<br>Phe294 ( $\pi$ -Alkyl)                                                   |
| 6     | 4f       | -7.9                       | Gln110 (2 / 2.598 Å and 3.292 Å)<br>Tyr111 (1 / 2.018 Å)<br>Asn151 (1 / 2.792 Å)<br>Arg298 (2 / 2.640 Å and 2.719 Å)                                                                              | Val104 (Alkyl)<br>Ile106 (Alkyl)<br>Gln110 ( $\pi$ -Donor hydrogen bond)<br>Ile152 (Carbon hydrogen bond)<br>Asp153 (Carbon hydrogen bond)<br>Arg298 ( $\pi$ -Donor hydrogen bond; $\pi$ -Cation; Alkyl; $\pi$ -Alkyl)<br>Val303 (Alkyl)<br>Phe305 ( $\pi$ -Alkyl) |
| 7     | 4g       | -8.1                       | Lys102 (2 / 2.317 Å and 3.117 Å)<br>Gln110 (3 / 2.380 Å, 3.343 Å, and 3.460 Å)<br>Asn151 (4 / 2.397 Å, 2.623 Å, 3.382 Å, and 3.445 Å)<br>Ser158 (1 / 2.895 Å)<br>Arg298 (2 / 2.157 Å and 2.486 Å) | Lys102 (Alkyl)<br>Val104 (Alkyl; $\pi$ -Alkyl)<br>Gln110 (Carbon hydrogen bond)<br>Ser158 (Carbon hydrogen bond)                                                                                                                                                   |
| 8     | 4h       | -7                         | Gln110 (1 / 3.222 Å)<br>His246 (3 / 2.530 Å, 3.170 Å, and 3.292 Å)                                                                                                                                | Gly109 (Carbon hydrogen bond)<br>Val202 ( $\pi$ -Alkyl)<br>His246 ( $\pi$ -Donor hydrogen bond; $\pi$ - $\pi$ T-Shaped; $\pi$ -Alkyl)<br>Ile249 ( $\pi$ -Alkyl)<br>Pro293 ( $\pi$ -Alkyl)                                                                          |
| 9     | 4i       | -7                         | Asn151 (1 / 3.490 Å)<br>Asp153 (1 / 2.722 Å)<br>Arg298 (3 / 1.868 Å, 2.321 Å, and 2.692 Å)                                                                                                        | Phe294 ( $\pi$ - $\pi$ T-Shaped; $\pi$ -Alkyl)<br>Val303 (Alkyl)                                                                                                                                                                                                   |
| 10    | 4j       | -7.3                       | Gln110 (3 / 2.792 Å, 2.860 Å, and 3.108 Å)<br>Asn151 (1 / 2.320 Å)<br>Ile152 (1 / 3.091 Å)<br>Arg298 (2 / 3.285 Å and 3.409 Å)                                                                    | Val104 (Alkyl; $\pi$ -Alkyl)<br>Ile106 (Alkyl)<br>Gln110 ( $\pi$ -Donor hydrogen bond)<br>Asp153 (Carbon hydrogen bond)<br>Phe294 ( $\pi$ -Alkyl)                                                                                                                  |



**Table S4.** Continued.

| Entry | Compound | Binding Energy (-Kcal/mol) | Interaction                                                                                                                                                  |                                                                                                                                                                                     |
|-------|----------|----------------------------|--------------------------------------------------------------------------------------------------------------------------------------------------------------|-------------------------------------------------------------------------------------------------------------------------------------------------------------------------------------|
|       |          |                            | Conventional hydrogen bond<br>(number / distance)                                                                                                            | Other interactions                                                                                                                                                                  |
| 11    | 4k       | -7.5                       | Gln110 (1 / 2.811 Å)<br>Asn151 (1 / 2.358 Å)<br>Ile152 (1 / 3.191 Å)<br>Arg298 (2 / 3.297 Å and 3.389 Å)                                                     | Val104 (Alkyl; $\pi$ -Alkyl)<br>Ile106 (Alkyl)<br>Gln110 ( $\pi$ -Donor hydrogen bond)<br>Asp153 (Carbon hydrogen bond)<br>Ser158 (Carbon hydrogen bond)<br>Arg298 ( $\pi$ -Cation) |
| 12    | 4l       | -6.7                       | Gln110 (3 / 2.561 Å, 2.711 Å, and 2.770 Å)<br>Asn151 (4 / 2.141 Å, 2.879 Å, 3.322 Å, and 3.478 Å)<br>Arg298 (1 / 3.363 Å)                                    | Lys102 (Alkyl)<br>Val104 (Alkyl; $\pi$ -Alkyl)<br>Asp153 (Carbon hydrogen bond)<br>Ser158 (Carbon hydrogen bond)<br>Arg298 ( $\pi$ -Cation)<br>Val303 (Alkyl)                       |
| 13    | 4m       | -6.6                       | Gln110 (1 / 2.171 Å)<br>Thr111 (4 / 2.262 Å, 2.902 Å, 3.322 Å, and 3.421 Å)<br>Asn151 (1 / 3.222 Å)<br>Arg298 (3 / 2.311 Å, 2.538 Å, and 2.871 Å)            | Asp153 (Carbon hydrogen bond)<br>Phe294 ( $\pi$ -Alkyl)<br>Arg298 ( $\pi$ -Donor hydrogen bond; Alkyl; $\pi$ -Alkyl)<br>Val303 (Alkyl)                                              |
| 14    | 4n       | -7.1                       | Gln110 (1 / 2.317 Å)<br>Thr111 (1 / 3.177 Å)<br>Asn151 (1 / 3.466 Å)<br>Asp153 (1 / 2.528 Å)<br>Arg298 (5 / 2.459 Å, 2.791 Å, 3.325 Å, 3.350 Å, and 3.379 Å) | Thr111 (Carbon hydrogen bond)<br>Asp153 ( $\pi$ -Anion)                                                                                                                             |

**Table S5.** Molecular docking results between **4a–n** and SARS-CoV-2 PL<sup>Pro</sup> active site (PDB ID: 6WX4).

| Entry | Compound | Binding energy (-Kcal/mol) | Interaction                                                                                |                                                                                                                                                                                                                                                                                                                 |
|-------|----------|----------------------------|--------------------------------------------------------------------------------------------|-----------------------------------------------------------------------------------------------------------------------------------------------------------------------------------------------------------------------------------------------------------------------------------------------------------------|
|       |          |                            | Conventional hydrogen bond (number / distance)                                             | Other interactions                                                                                                                                                                                                                                                                                              |
| 1     | 4a       | -7.5                       | Asp164 (1 / 3.384 Å)<br>Tyr273 (1 / 2.651 Å)                                               | Leu162 (Alkyl; $\pi$ - $\sigma$ )<br>Gly163 (Carbon hydrogen bond)<br>Pro248 (Alkyl)<br>Tyr264 ( $\pi$ - $\pi$ T-Shaped; $\pi$ -Alkyl)<br>Tyr268 ( $\pi$ -Alkyl)                                                                                                                                                |
| 2     | 4b       | -7.5                       | Tyr268 (1 / 2.592 Å)<br>Tyr273 (1 / 3.311 Å)                                               | Leu162 (Carbon hydrogen bond; Alkyl)<br>Glu167 (Carbon hydrogen bond; $\pi$ -Anion)<br>Pro248 (Alkyl)<br>Tyr264 ( $\pi$ - $\pi$ Stacked; $\pi$ -Alkyl)<br>Tyr273 ( $\pi$ -Alkyl)                                                                                                                                |
| 3     | 4c       | -7.8                       | Tyr268 (1 / 2.447 Å)<br>Tyr273 (1 / 3.240 Å)                                               | Leu162 (Alkyl)<br>Glu167 (Carbon hydrogen bond; $\pi$ -Anion)<br>Pro248 (Alkyl)<br>Tyr264 ( $\pi$ - $\pi$ Stacked; $\pi$ -Alkyl)<br>Tyr273 ( $\pi$ -Alkyl)                                                                                                                                                      |
| 4     | 4d       | -8.1                       | Tyr268 (1 / 2.442 Å)<br>Tyr273 (1 / 3.425 Å)                                               | Leu162 (Alkyl)<br>Asp164 ( $\pi$ -Anion)<br>Pro248 (Carbon hydrogen bond)<br>Tyr264 ( $\pi$ - $\pi$ Stacked; $\pi$ -Alkyl)                                                                                                                                                                                      |
| 5     | 4e       | -7.9                       | Gly163 (1 / 3.227 Å)<br>Asp164 (1 / 3.379 Å)<br>Tyr273 (1 / 2.078 Å)                       | Cys111 (Alkyl)<br>Leu162 (Alkyl)<br>Gly163 (Carbon hydrogen bond)<br>Asp164 ( $\pi$ -Anion)<br>Pro248 (Carbon hydrogen bond; Alkyl)<br>Tyr264 ( $\pi$ - $\pi$ Stacked; $\pi$ - $\sigma$ )<br>Tyr273 ( $\pi$ -Alkyl)<br>Thr301 (Carbon hydrogen bond)                                                            |
| 6     | 4f       | -7.8                       | Asp164 (1 / 3.158 Å)<br>Gly271 (3 / 1.784 Å, 1.894 Å, and 3.043 Å)<br>Tyr273 (1 / 1.826 Å) | Cys111 (Alkyl)<br>Tyr112 ( $\pi$ -Alkyl)<br>Leu162 (Alkyl; $\pi$ -Alkyl)<br>Gly163 (Carbon hydrogen bond)<br>Asp164 (Carbon hydrogen bond; $\pi$ -Anion)<br>Pro248 (Alkyl)<br>Tyr264 ( $\pi$ -Alkyl)<br>Tyr273 ( $\pi$ -Alkyl)<br>Thr301 (Carbon hydrogen bond)                                                 |
| 7     | 4g       | -8.4                       | Arg166 (1 / 3.027 Å)<br>Tyr273 (1 / 2.977 Å)<br>Thr301 (1 / 3.376 Å)                       | Leu162 (Alkyl)<br>Asp164 ( $\pi$ -Anion)<br>Arg166 (Carbon hydrogen bond; $\pi$ -Alkyl)<br>Met208 ( $\pi$ -Sulfur)<br>Ala246 (Amide- $\pi$ stacked)<br>Pro247 (van der Waals)<br>Tyr264 ( $\pi$ -Alkyl)<br>Tyr268 (Carbon hydrogen bond; $\pi$ - $\pi$ T-Shaped; $\pi$ -Alkyl)<br>Asp302 (Carbon hydrogen bond) |
| 8     | 4h       | -7.4                       | Asp164 (1 / 3.124 Å)<br>Tyr273 (1 / 1.904 Å)                                               | Leu162 ( $\pi$ -Alkyl)<br>Gly163 (Carbon hydrogen bond)<br>Asp164 ( $\pi$ -Anion)<br>Pro248 (Carbon hydrogen bond; Alkyl)<br>Tyr264 ( $\pi$ - $\sigma$ )<br>Tyr273 ( $\pi$ -Alkyl)<br>Thr301 (Carbon hydrogen bond)                                                                                             |

Table S5. Continued.

| Entry | Compound | Binding Energy (-Kcal/mol) | Interaction                                                                                                                      |                                                                                                                                                                                                                                                                                                                                           |
|-------|----------|----------------------------|----------------------------------------------------------------------------------------------------------------------------------|-------------------------------------------------------------------------------------------------------------------------------------------------------------------------------------------------------------------------------------------------------------------------------------------------------------------------------------------|
|       |          |                            | Conventional hydrogen bond<br>(number / distance)                                                                                | Other interactions                                                                                                                                                                                                                                                                                                                        |
| 9     | 4i       | -7                         | Lys157 (1 / 2.847 Å)<br>Tyr264 (1 / 2.769 Å)<br>Tyr268 (1 / 2.270 Å)<br>Thr301 (1 / 3.435 Å)                                     | Leu162 (Alkyl)<br>Asp164 ( $\pi$ -Anion)<br>Pro248 (Alkyl)<br>Tyr264 ( $\pi$ - $\sigma$ )<br>Tyr273 ( $\pi$ -Alkyl)<br>Thr301 (Carbon hydrogen bond)                                                                                                                                                                                      |
| 10    | 4j       | -7                         | Lys157 (1 / 2.682 Å)<br>Tyr264 (1 / 2.902 Å)<br>Tyr268 (1 / 2.200 Å)<br>Thr301 (1 / 3.474 Å)                                     | Leu162 (Alkyl)<br>Asp164 ( $\pi$ -Anion)<br>Pro248 (Alkyl)<br>Tyr264 ( $\pi$ - $\sigma$ )<br>Tyr273 ( $\pi$ -Alkyl)                                                                                                                                                                                                                       |
| 11    | 4k       | -7.7                       | Asp164 (1 / 3.170 Å)<br>Gly271 (1 / 2.263 Å)<br>Tyr273 (1 / 1.949 Å)                                                             | Leu162 ( $\pi$ -Alkyl)<br>Gly163 (Carbon hydrogen bond)<br>Asp164 ( $\pi$ -Anion)<br>Pro248 (Carbon hydrogen bond; Alkyl)<br>Tyr264 ( $\pi$ - $\pi$ T-Shaped; $\pi$ - $\sigma$ )<br>Gln269 (Halogen {F})<br>Cys270 (Carbon hydrogen bond; Halogen {F})<br>Gly271 (Halogen {F})<br>Tyr273 ( $\pi$ -Alkyl)<br>Thr301 (Carbon hydrogen bond) |
| 12    | 4l       | -7.5                       | Gly163 (1 / 3.299 Å)<br>Asp164 (1 / 3.218 Å)<br>Tyr273 (1 / 1.857 Å)                                                             | Cys111 (Alkyl)<br>Leu162 (Alkyl; $\pi$ -Alkyl)<br>Gly163 (Carbon hydrogen bond)<br>Asp164 ( $\pi$ -Anion)<br>Pro248 (Carbon hydrogen bond; Alkyl)<br>Tyr264 ( $\pi$ - $\pi$ T-Shaped; $\pi$ - $\sigma$ ; $\pi$ -Alkyl)<br>Tyr273 ( $\pi$ -Alkyl)<br>Thr301 (Carbon hydrogen bond)                                                         |
| 13    | 4m       | -7.6                       | Asp164 (1 / 3.108 Å)<br>Tyr264 (1 / 3.399 Å)<br>Cys270 (1 / 2.456 Å)<br>Gly271 (2 / 2.023 Å and 2.596 Å)<br>Tyr273 (1 / 1.823 Å) | Cys111 (Alkyl)<br>Leu162 (Alkyl; $\pi$ -Alkyl)<br>Gly163 (Carbon hydrogen bond)<br>Asp164 (Carbon hydrogen bond; $\pi$ -Anion)<br>Pro248 (Alkyl)<br>Tyr264 ( $\pi$ - $\pi$ T-Shaped; $\pi$ -Alkyl)<br>Tyr273 ( $\pi$ -Alkyl)<br>Thr301 (Carbon hydrogen bond)                                                                             |
| 14    | 4n       | -7.5                       | Lys157 (2 / 2.355 Å and 2.981 Å)<br>Tyr264 (1 / 2.855 Å)<br>Gln269 (1 / 3.043 Å)                                                 | Leu162 (Alkyl)<br>Asp164 ( $\pi$ -Anion)<br>Pro248 (Alkyl)<br>Tyr264 ( $\pi$ - $\sigma$ )<br>Tyr273 ( $\pi$ -Alkyl)                                                                                                                                                                                                                       |



**Table S6.** Molecular docking results between **4a–n** and SARS-CoV-2 PL<sup>Pro</sup> allosteric site (PDB ID: 6WX4).

| Entry | Compound | Binding energy (-Kcal/mol) | Interaction                                                      |                                                                                                                                                                                                                                     |
|-------|----------|----------------------------|------------------------------------------------------------------|-------------------------------------------------------------------------------------------------------------------------------------------------------------------------------------------------------------------------------------|
|       |          |                            | Conventional hydrogen bond (number / distance)                   | Other interactions                                                                                                                                                                                                                  |
| 1     | 4a       | -6.5                       |                                                                  | Pro59 (Alkyl)<br>Arg65 (Carbon hydrogen bond; $\pi$ -Alkyl)<br>Ala68 (Alkyl)<br>Phe69 ( $\pi$ - $\sigma$ )<br>Thr74 (Carbon hydrogen bond)<br>Pro77 (Carbon hydrogen bond; Alkyl)                                                   |
| 2     | 4b       | -7.3                       | Arg65 (2 / 2.376 Å and 3.368 Å)                                  | Pro59 (Alkyl)<br>Arg65 (Alkyl; $\pi$ -Alkyl)<br>Val66 (Alkyl; $\pi$ -Alkyl)<br>Phe69 ( $\pi$ -Alkyl)                                                                                                                                |
| 3     | 4c       | -7.2                       |                                                                  | Pro59 (Alkyl)<br>Asp62 ( $\pi$ -Anion)<br>Arg65 (Carbon hydrogen bond; Alkyl; $\pi$ -Alkyl)<br>Val66 (Carbon hydrogen bond)<br>Ala68 (Alkyl)<br>Phe69 ( $\pi$ - $\pi$ Stacked; $\pi$ -Alkyl)                                        |
| 4     | 4d       | -7.2                       | Arg65 (1 / 2.373 Å)<br>Val66 (1 / 3.353 Å)                       | Asp62 ( $\pi$ -Anion)<br>Arg65 ( $\pi$ -Alkyl)<br>Val66 (Alkyl)<br>Phe69 ( $\pi$ - $\sigma$ )                                                                                                                                       |
| 5     | 4e       | -7.4                       | Arg65 (1 / 3.473 Å)                                              | Pro59 (Alkyl)<br>Asp62 ( $\pi$ -Anion)<br>Arg65 (Carbon hydrogen bond; Alkyl; $\pi$ -Alkyl)<br>Val66 (Carbon hydrogen bond)<br>Ala68 (Alkyl)<br>Phe69 ( $\pi$ - $\pi$ Stacked; $\pi$ -Alkyl)                                        |
| 6     | 4f       | -6.8                       | Pro59 (1 / 2.815 Å)<br>Arg65 (1 / 2.691 Å)                       | Pro59 (Alkyl)<br>Asp62 ( $\pi$ -Anion)<br>Arg65 (Carbon hydrogen bond; $\pi$ -Alkyl)<br>Ala68 (Alkyl)<br>Phe69 ( $\pi$ - $\sigma$ )<br>Thr74 (Carbon hydrogen bond)<br>Thr75 (Carbon hydrogen bond)<br>Pro77 (Carbon hydrogen bond) |
| 7     | 4g       | -7.8                       | Arg65 (1 / 2.355 Å)<br>Val66 (1 / 3.164 Å)                       | Pro59 ( $\pi$ -Alkyl)<br>Asp62 ( $\pi$ -Anion)<br>Arg65 ( $\pi$ -Alkyl)<br>Val66 (Alkyl)<br>Ala68 ( $\pi$ -Alkyl)<br>Phe69 ( $\pi$ - $\sigma$ )                                                                                     |
| 8     | 4h       | -5.9                       | Arg65 (3 / 2.646 Å, 3.067 Å, and 3.144 Å)<br>Phe69 (1 / 3.179 Å) | Pro59 (Alkyl; $\pi$ -Alkyl)<br>Arg65 (Alkyl; $\pi$ -Alkyl; Unfavorable acceptor-acceptor)<br>Ala68 (Alkyl)<br>Thr74 (Carbon hydrogen bond)<br>Pro77 (Carbon hydrogen bond; $\pi$ -Alkyl)                                            |
| 9     | 4i       | -5.8                       | Arg65 (1 / 3.289 Å)                                              | Pro59 (Alkyl)<br>Arg65 (Carbon hydrogen bond; Alkyl; $\pi$ -Alkyl)<br>Val66 (Alkyl)<br>Ala68 (Alkyl)<br>Pro77 (Alkyl)                                                                                                               |
| 10    | 4j       | -6.3                       | Arg65 (1 / 2.569 Å)<br>Thr75 (2 / 2.255 Å and 3.235 Å)           | Pro59 (Alkyl; $\pi$ -Alkyl)<br>Arg65 (Carbon hydrogen bond; $\pi$ -Alkyl)<br>Ala68 (Alkyl; $\pi$ -Alkyl)                                                                                                                            |

**Table S6.** Continued.

| Entry | Compound | Binding energy (-Kcal/mol) | Interaction                                                                                                                          |                                                                                                                                                                                                      |
|-------|----------|----------------------------|--------------------------------------------------------------------------------------------------------------------------------------|------------------------------------------------------------------------------------------------------------------------------------------------------------------------------------------------------|
|       |          |                            | Conventional hydrogen bond<br>(number / distance)                                                                                    | Other interactions                                                                                                                                                                                   |
| 11    | 4k       | -6.6                       | Arg65 (1 / 2.522 Å)<br>Thr75 (2 / 2.316 Å and 3.289 Å)                                                                               | Pro59 ( $\pi$ -Alkyl)<br>Arg65 (Carbon hydrogen bond; $\pi$ -Alkyl)<br>Ala68 ( $\pi$ -Alkyl)<br>Thr74 (Halogen {F})<br>Pro77 (Alkyl)                                                                 |
| 12    | 4l       | -6                         | Arg65 (3 / 2.621 Å, 3.145 Å, and 3.163 Å)<br>Thr75 (1 / 3.405 Å)                                                                     | Pro59 (Alkyl; $\pi$ -Alkyl)<br>Arg65 (Alkyl; $\pi$ -Alkyl; Unfavorable acceptor-acceptor)<br>Ala68 (Alkyl)<br>Thr74 (Carbon hydrogen bond)<br>Pro77 (Carbon hydrogen bond; Alkyl; $\pi$ -Alkyl)      |
| 13    | 4m       | -6.5                       | Arg65 (3 / 2.132 Å, 2.208 Å, and 3.191 Å)<br>Phe69 (1 / 3.273 Å)<br>Thr74 (1 / 3.408 Å)<br>Thr75 (3 / 2.135 Å, 3.304 Å, and 3.314 Å) | Pro59 ( $\pi$ -Alkyl)<br>Arg65 (Carbon hydrogen bond; Alkyl; $\pi$ -Alkyl)<br>Thr75 (Unfavorable donor-donor)<br>Pro77 (Alkyl; $\pi$ -Alkyl)                                                         |
| 14    | 4n       | -6.7                       | Arg65 (3 / 2.107 Å, 2.325 Å, and 2.907 Å)<br>Thr75 (1 / 2.433 Å)                                                                     | Pro59 ( $\pi$ -Alkyl)<br>Asn60 (Carbon hydrogen bond)<br>Arg65 (Carbon hydrogen bond; $\pi$ - $\sigma$ ; $\pi$ -Alkyl)<br>Ala68 ( $\pi$ -Alkyl)<br>Pro77 (Carbon hydrogen bond; Alkyl; $\pi$ -Alkyl) |

**Table S7.** Physicochemical properties and lipophilicity of **4a–n**.

| Entry | Compound | Chemical formula                                                | Molecular weight (MW) (g/mol) | Number of heavy atoms | Number of aromatic heavy atoms | Fraction Csp3 | Number of rotatable bonds | Number of hydrogen bond acceptors | Number of hydrogen bond donors | Molar refractivity (MR) | Topological polar surface area (TPSA) (Å <sup>2</sup> ) | Log <i>P</i> <sub>0/w</sub> (iLOGP) | Log <i>P</i> <sub>0/w</sub> (XLOGP3) | Log <i>P</i> <sub>0/w</sub> (WLOGP) | Log <i>P</i> <sub>0/w</sub> (MLOGP) | Log <i>P</i> <sub>0/w</sub> (SILICOS-IT) | Consensus Log <i>P</i> <sub>0/w</sub> |
|-------|----------|-----------------------------------------------------------------|-------------------------------|-----------------------|--------------------------------|---------------|---------------------------|-----------------------------------|--------------------------------|-------------------------|---------------------------------------------------------|-------------------------------------|--------------------------------------|-------------------------------------|-------------------------------------|------------------------------------------|---------------------------------------|
| 1     | 4a       | C <sub>21</sub> H <sub>23</sub> N <sub>3</sub> O <sub>4</sub>   | 381.43                        | 28                    | 15                             | 0.38          | 4                         | 4                                 | 1                              | 108.36                  | 86.24                                                   | 3.37                                | 4.23                                 | 2.62                                | 2.38                                | 2.79                                     | 3.08                                  |
| 2     | 4b       | C <sub>21</sub> H <sub>22</sub> BrN <sub>3</sub> O <sub>4</sub> | 460.32                        | 29                    | 15                             | 0.38          | 4                         | 4                                 | 1                              | 116.06                  | 86.24                                                   | 3.65                                | 4.92                                 | 3.38                                | 2.97                                | 3.47                                     | 3.68                                  |
| 3     | 4c       | C <sub>21</sub> H <sub>22</sub> ClN <sub>3</sub> O <sub>4</sub> | 415.87                        | 29                    | 15                             | 0.38          | 4                         | 4                                 | 1                              | 113.37                  | 86.24                                                   | 3.54                                | 4.86                                 | 3.27                                | 2.86                                | 3.43                                     | 3.59                                  |
| 4     | 4d       | C <sub>21</sub> H <sub>22</sub> FN <sub>3</sub> O <sub>4</sub>  | 399.42                        | 29                    | 15                             | 0.38          | 4                         | 5                                 | 1                              | 108.32                  | 86.24                                                   | 3.41                                | 4.33                                 | 3.17                                | 2.76                                | 3.21                                     | 3.38                                  |
| 5     | 4e       | C <sub>21</sub> H <sub>22</sub> BrN <sub>3</sub> O <sub>4</sub> | 460.32                        | 29                    | 15                             | 0.38          | 4                         | 4                                 | 1                              | 116.06                  | 86.24                                                   | 3.46                                | 4.92                                 | 3.38                                | 2.97                                | 3.47                                     | 3.64                                  |
| 6     | 4f       | C <sub>22</sub> H <sub>25</sub> N <sub>3</sub> O <sub>6</sub>   | 427.45                        | 31                    | 15                             | 0.41          | 5                         | 6                                 | 2                              | 116.87                  | 115.70                                                  | 3.34                                | 3.85                                 | 2.33                                | 1.70                                | 2.38                                     | 2.72                                  |
| 7     | 4g       | C <sub>22</sub> H <sub>23</sub> N <sub>3</sub> O <sub>6</sub>   | 425.43                        | 31                    | 15                             | 0.41          | 4                         | 6                                 | 1                              | 114.42                  | 104.70                                                  | 3.47                                | 4.04                                 | 2.34                                | 1.97                                | 2.64                                     | 2.89                                  |
| 8     | 4h       | C <sub>19</sub> H <sub>21</sub> N <sub>3</sub> O <sub>4</sub>   | 355.39                        | 26                    | 15                             | 0.32          | 4                         | 4                                 | 1                              | 100.90                  | 86.24                                                   | 3.17                                | 3.40                                 | 2.08                                | 1.93                                | 2.46                                     | 2.61                                  |
| 9     | 4i       | C <sub>19</sub> H <sub>20</sub> BrN <sub>3</sub> O <sub>4</sub> | 434.28                        | 27                    | 15                             | 0.32          | 4                         | 4                                 | 1                              | 108.60                  | 86.24                                                   | 3.58                                | 4.10                                 | 2.84                                | 2.53                                | 3.15                                     | 3.24                                  |
| 10    | 4j       | C <sub>19</sub> H <sub>20</sub> ClN <sub>3</sub> O <sub>4</sub> | 389.83                        | 27                    | 15                             | 0.32          | 4                         | 4                                 | 1                              | 105.91                  | 86.24                                                   | 3.50                                | 4.03                                 | 2.73                                | 2.42                                | 3.11                                     | 3.16                                  |
| 11    | 4k       | C <sub>19</sub> H <sub>20</sub> FN <sub>3</sub> O <sub>4</sub>  | 373.38                        | 27                    | 15                             | 0.32          | 4                         | 5                                 | 1                              | 100.86                  | 86.24                                                   | 3.30                                | 3.50                                 | 2.64                                | 2.31                                | 2.90                                     | 2.93                                  |
| 12    | 4l       | C <sub>19</sub> H <sub>20</sub> BrN <sub>3</sub> O <sub>4</sub> | 434.28                        | 27                    | 15                             | 0.32          | 4                         | 4                                 | 1                              | 108.60                  | 86.24                                                   | 3.38                                | 4.10                                 | 2.84                                | 2.53                                | 3.15                                     | 3.20                                  |
| 13    | 4m       | C <sub>20</sub> H <sub>23</sub> N <sub>3</sub> O <sub>6</sub>   | 401.41                        | 29                    | 15                             | 0.35          | 5                         | 6                                 | 2                              | 109.41                  | 115.70                                                  | 3.17                                | 3.02                                 | 1.79                                | 1.26                                | 2.08                                     | 2.27                                  |
| 14    | 4n       | C <sub>20</sub> H <sub>21</sub> N <sub>3</sub> O <sub>6</sub>   | 399.40                        | 29                    | 15                             | 0.35          | 4                         | 6                                 | 1                              | 106.96                  | 104.70                                                  | 3.43                                | 3.22                                 | 1.81                                | 1.53                                | 2.35                                     | 2.47                                  |

**Table S8.** Water solubility of **4a–n**.

| Entry | Compound | Log <i>S</i> (ESOL) / Solubility (mg/ml) / Class | Log <i>S</i> (AlI) / Solubility (mg/ml) / Class | Log <i>S</i> (SILICOS-IT) / Solubility (mg/ml) / Class |
|-------|----------|--------------------------------------------------|-------------------------------------------------|--------------------------------------------------------|
| 1     | 4a       | -5.00 / 3.80e-03 / Moderately soluble            | -5.75 / 6.76e-04 / Moderately soluble           | -5.37 / 1.62e-03 / Moderately soluble                  |
| 2     | 4b       | -5.91 / 5.63e-04 / Moderately soluble            | -6.47 / 1.57e-04 / Poorly soluble               | -6.15 / 3.25e-04 / Poorly soluble                      |
| 3     | 4c       | -5.60 / 1.05e-04 / Moderately soluble            | -6.41 / 1.63e-04 / Poorly soluble               | -5.96 / 4.58e-04 / Moderately soluble                  |
| 4     | 4d       | -5.16 / 2.74e-03 / Moderately soluble            | -5.86 / 5.57e-04 / Moderately soluble           | -5.64 / 9.23e-04 / Moderately soluble                  |
| 5     | 4e       | -5.91 / 5.63e-04 / Moderately soluble            | -6.47 / 1.57e-04 / Poorly soluble               | -6.15 / 3.25e-04 / Poorly soluble                      |
| 6     | 4f       | -4.94 / 4.87e-03 / Moderately soluble            | -5.98 / 4.52e-04 / Moderately soluble           | -4.88 / 5.57e-03 / Moderately soluble                  |
| 7     | 4g       | -5.12 / 3.25e-03 / Moderately soluble            | -5.94 / 4.86e-04 / Moderately soluble           | -5.09 / 3.49e-03 / Moderately soluble                  |
| 8     | 4h       | -4.35 / 1.59e-02 / Moderately soluble            | -4.89 / 4.57e-03 / Moderately soluble           | -5.17 / 2.43e-03 / Moderately soluble                  |
| 9     | 4i       | -5.26 / 2.37e-03 / Moderately soluble            | -5.62 / 1.05e-03 / Moderately soluble           | -5.95 / 4.86e-04 / Moderately soluble                  |
| 10    | 4j       | -4.94 / 4.45e-03 / Moderately soluble            | -5.54 / 1.11e-03 / Moderately soluble           | -5.75 / 6.85e-04 / Moderately soluble                  |
| 11    | 4k       | -4.51 / 1.16e-02 / Moderately soluble            | -4.99 / 3.78e-03 / Moderately soluble           | -5.43 / 1.38e-03 / Moderately soluble                  |
| 12    | 4l       | -5.26 / 2.37e-03 / Moderately soluble            | -5.62 / 1.05e-03 / Moderately soluble           | -5.95 / 4.86e-04 / Moderately soluble                  |
| 13    | 4m       | -4.28 / 2.09e-02 / Moderately soluble            | -5.11 / 3.08e-03 / Moderately soluble           | -4.68 / 8.35e-03 / Moderately soluble                  |
| 14    | 4n       | -4.46 / 1.37e-02 / Moderately soluble            | -5.09 / 3.24e-03 / Moderately soluble           | -4.88 / 5.22e-03 / Moderately soluble                  |

Solubility class: Log *S* Class = Insoluble < -10 < Poorly < -6 < Moderately < -4 < Soluble < -2 < Very < 0 < Highly.

**Table S9.** Pharmacokinetics of **4a–n**.

| Entry | Compound | Gastrointestinal (GI) absorption | BBB permeant | P-glycoprotein (P-gp) substrate | Cytochrome P450 1A2 (CYP1A2) inhibitor | Cytochrome P450 2C19 (CYP2C19) inhibitor | Cytochrome P450 C9 (CYP2C9) inhibitor | Cytochrome P450 2D6 (CYP2D6) inhibitor | Cytochrome P450 3A4 (CYP3A4) inhibitor | Log $K_p$ (skin permeation) (cm/s) |
|-------|----------|----------------------------------|--------------|---------------------------------|----------------------------------------|------------------------------------------|---------------------------------------|----------------------------------------|----------------------------------------|------------------------------------|
| 1     | 4a       | High                             | No           | No                              | No                                     | Yes                                      | Yes                                   | No                                     | Yes                                    | -5.62                              |
| 2     | 4b       | High                             | No           | No                              | No                                     | Yes                                      | Yes                                   | No                                     | Yes                                    | -5.61                              |
| 3     | 4c       | High                             | No           | No                              | No                                     | Yes                                      | Yes                                   | No                                     | Yes                                    | -5.39                              |
| 4     | 4d       | High                             | No           | No                              | No                                     | Yes                                      | Yes                                   | No                                     | No                                     | -5.66                              |
| 5     | 4e       | High                             | No           | No                              | No                                     | Yes                                      | Yes                                   | No                                     | Yes                                    | -5.61                              |
| 6     | 4f       | High                             | No           | No                              | No                                     | No                                       | Yes                                   | No                                     | No                                     | -6.17                              |
| 7     | 4g       | High                             | No           | No                              | No                                     | Yes                                      | Yes                                   | No                                     | Yes                                    | -6.03                              |
| 8     | 4h       | High                             | No           | No                              | No                                     | No                                       | Yes                                   | No                                     | No                                     | -6.05                              |
| 9     | 4i       | High                             | No           | No                              | No                                     | Yes                                      | Yes                                   | No                                     | Yes                                    | -6.04                              |
| 10    | 4j       | High                             | No           | No                              | No                                     | Yes                                      | Yes                                   | No                                     | Yes                                    | -5.82                              |
| 11    | 4k       | High                             | No           | No                              | No                                     | No                                       | Yes                                   | No                                     | No                                     | -6.09                              |
| 12    | 4l       | High                             | No           | No                              | No                                     | Yes                                      | Yes                                   | No                                     | Yes                                    | -6.04                              |
| 13    | 4m       | High                             | No           | No                              | No                                     | No                                       | Yes                                   | No                                     | No                                     | -6.60                              |
| 14    | 4n       | High                             | No           | No                              | No                                     | Yes                                      | Yes                                   | No                                     | Yes                                    | -6.45                              |

**Table S10.** Drug-likeness and medicinal chemistry of **4a–n**.

| Entry | Compound | Lipinski (Pfizer) filter | Ghose (Amgen) filter | Veber (GSK) filter | Egan (Pharmacia) filter | Muegge (Bayer) filter | Abbot bioavailability score | Pan assay interference structures (PAINS) alert | Brenk alert | Lead-likeness                   | Synthetic accessibility score |
|-------|----------|--------------------------|----------------------|--------------------|-------------------------|-----------------------|-----------------------------|-------------------------------------------------|-------------|---------------------------------|-------------------------------|
| 1     | 4a       | Yes (violation = 0)      | Yes                  | Yes                | Yes                     | Yes                   | 0.55                        | 0                                               | 0           | No (violation = 2) <sup>A</sup> | 3.79                          |
| 2     | 4b       | Yes (violation = 0)      | Yes                  | Yes                | Yes                     | Yes                   | 0.55                        | 0                                               | 0           | No (violation = 2) <sup>A</sup> | 3.79                          |
| 3     | 4c       | Yes (violation = 0)      | Yes                  | Yes                | Yes                     | Yes                   | 0.55                        | 0                                               | 0           | No (violation = 2) <sup>A</sup> | 3.79                          |
| 4     | 4d       | Yes (violation = 0)      | Yes                  | Yes                | Yes                     | Yes                   | 0.55                        | 0                                               | 0           | No (violation = 2) <sup>A</sup> | 3.79                          |
| 5     | 4e       | Yes (violation = 0)      | Yes                  | Yes                | Yes                     | Yes                   | 0.55                        | 0                                               | 0           | No (violation = 2) <sup>A</sup> | 3.82                          |
| 6     | 4f       | Yes (violation = 0)      | Yes                  | Yes                | Yes                     | Yes                   | 0.55                        | 0                                               | 0           | No (violation = 2) <sup>A</sup> | 3.94                          |
| 7     | 4g       | Yes (violation = 0)      | Yes                  | Yes                | Yes                     | Yes                   | 0.55                        | 0                                               | 0           | No (violation = 2) <sup>A</sup> | 3.92                          |
| 8     | 4h       | Yes (violation = 0)      | Yes                  | Yes                | Yes                     | Yes                   | 0.55                        | 0                                               | 0           | No (violation = 1) <sup>B</sup> | 3.64                          |
| 9     | 4i       | Yes (violation = 0)      | Yes                  | Yes                | Yes                     | Yes                   | 0.55                        | 0                                               | 0           | No (violation = 2) <sup>A</sup> | 3.64                          |
| 10    | 4j       | Yes (violation = 0)      | Yes                  | Yes                | Yes                     | Yes                   | 0.55                        | 0                                               | 0           | No (violation = 2) <sup>A</sup> | 3.62                          |
| 11    | 4k       | Yes (violation = 0)      | Yes                  | Yes                | Yes                     | Yes                   | 0.55                        | 0                                               | 0           | No (violation = 1) <sup>B</sup> | 3.62                          |
| 12    | 4l       | Yes (violation = 0)      | Yes                  | Yes                | Yes                     | Yes                   | 0.55                        | 0                                               | 0           | No (violation = 2) <sup>A</sup> | 3.68                          |
| 13    | 4m       | Yes (violation = 0)      | Yes                  | Yes                | Yes                     | Yes                   | 0.55                        | 0                                               | 0           | No (violation = 1) <sup>B</sup> | 3.78                          |
| 14    | 4n       | Yes (violation = 0)      | Yes                  | Yes                | Yes                     | Yes                   | 0.55                        | 0                                               | 0           | No (violation = 1) <sup>B</sup> | 3.77                          |

Lipinski (Pfizer) filter:  $MW \leq 500$ ;  $MLOGP \leq 4.15$ ; Number of nitrogen (N) or oxygen (O)  $\leq 10$ ; Number of NH or OH  $\leq 5$ .

Ghose filter:  $160 \leq MW \leq 480$ ;  $-0.4 \leq WLOGP \leq 5.6$ ;  $40 \leq MR \leq 130$ ;  $20 \leq \text{Atoms} \leq 70$ .

Veber (GSK) filter: Number of rotatable bonds  $\leq 10$ ;  $TPSA \leq 140 \text{ \AA}^2$ .

Egan (Pharmacia) filter:  $WLOGP \leq 5.88$ ;  $TPSA \leq 131.6 \text{ \AA}^2$ .

Muegge (Bayer) filter:  $200 \leq MW \leq 600$ ;  $-2 \leq XLOGP \leq 4.15$ ;  $TPSA \leq 150 \text{ \AA}^2$ ; Number of rings  $\leq 7$ ; Number of carbon atoms  $> 4$ ; Number of heteroatoms  $> 1$ ; Number of rotatable bonds  $\leq 15$ ; Number of H-bond acceptors  $\leq 10$ ; Number of H-bond donors  $\leq 5$ .

Lead-likeness:  $250 \leq MW \leq 350$ ;  $XLOGP \leq 3.5$ ; Number of rotatable bonds  $\leq 7$ .

Synthetic accessibility score: From 1 (very easy) to 10 (very difficult).

A: Violations related to  $MW > 350$  and  $XLOGP3 > 3.5$ .

B: Violation related to  $MW > 350$ .



**Table S11. Toxicity of 4a–n.**

| Entry | Compound | Ames toxicity | Maximum tolerated dose (human) (log mg/kg/day) | Human Ether-à-go-go-Related Gene I ( <i>h</i> ERG I) inhibitor | Human Ether-à-go-go-Related Gene II ( <i>h</i> ERG II) inhibitor | Oral rat acute toxicity (LD <sub>50</sub> ) (mol/kg) | Oral rat chronic toxicity (LOAEL) (log mg/kg body weight /day) | Hepatotoxicity | Skin sensitization | <i>Tetrahymena pyriformis</i> toxicity (log µg/L) | Minnow toxicity (log mM) |
|-------|----------|---------------|------------------------------------------------|----------------------------------------------------------------|------------------------------------------------------------------|------------------------------------------------------|----------------------------------------------------------------|----------------|--------------------|---------------------------------------------------|--------------------------|
| 1     | 4a       | No            | -0.264                                         | No                                                             | No                                                               | 2.489                                                | 1.408                                                          | Yes            | No                 | 0.528                                             | 2.606                    |
| 2     | 4b       | No            | -0.177                                         | No                                                             | No                                                               | 2.602                                                | 1.573                                                          | Yes            | No                 | 0.512                                             | 1.968                    |
| 3     | 4c       | No            | -0.173                                         | No                                                             | No                                                               | 2.595                                                | 1.6                                                            | Yes            | No                 | 0.514                                             | 2.114                    |
| 4     | 4d       | No            | -0.04                                          | No                                                             | No                                                               | 2.622                                                | 1.303                                                          | Yes            | No                 | 0.426                                             | 2.597                    |
| 5     | 4e       | No            | -0.261                                         | No                                                             | No                                                               | 2.621                                                | 1.572                                                          | Yes            | No                 | 0.502                                             | 1.895                    |
| 6     | 4f       | No            | -0.468                                         | No                                                             | No                                                               | 2.673                                                | 1.148                                                          | Yes            | No                 | 0.343                                             | 2.557                    |
| 7     | 4g       | No            | -0.099                                         | No                                                             | No                                                               | 2.793                                                | 1.306                                                          | Yes            | No                 | 0.313                                             | 2.628                    |
| 8     | 4h       | No            | +0.241                                         | No                                                             | No                                                               | 2.37                                                 | 1.427                                                          | Yes            | No                 | 0.782                                             | 1.371                    |
| 9     | 4i       | No            | +0.289                                         | No                                                             | No                                                               | 2.523                                                | 1.358                                                          | Yes            | No                 | 0.759                                             | 0.751                    |
| 10    | 4j       | No            | +0.293                                         | No                                                             | No                                                               | 2.513                                                | 1.369                                                          | Yes            | No                 | 0.762                                             | 0.897                    |
| 11    | 4k       | No            | +0.408                                         | No                                                             | Yes                                                              | 2.531                                                | 1.256                                                          | Yes            | No                 | 0.602                                             | 1.003                    |
| 12    | 4l       | No            | +0.222                                         | No                                                             | No                                                               | 2.532                                                | 1.354                                                          | Yes            | No                 | 0.746                                             | 0.68                     |
| 13    | 4m       | No            | -0.092                                         | No                                                             | Yes                                                              | 2.47                                                 | 1.251                                                          | Yes            | No                 | 0.405                                             | 1.787                    |
| 14    | 4n       | No            | +0.308                                         | No                                                             | Yes                                                              | 2.692                                                | 1.166                                                          | Yes            | No                 | 0.371                                             | 0.641                    |

**FT-IR Spectrum of 5-benzoyl-6-(cyclohexylamino)-1,3-dimethylfuro[2,3-d]pyrimidine-2,4(1H,3H)-dione (4a)**

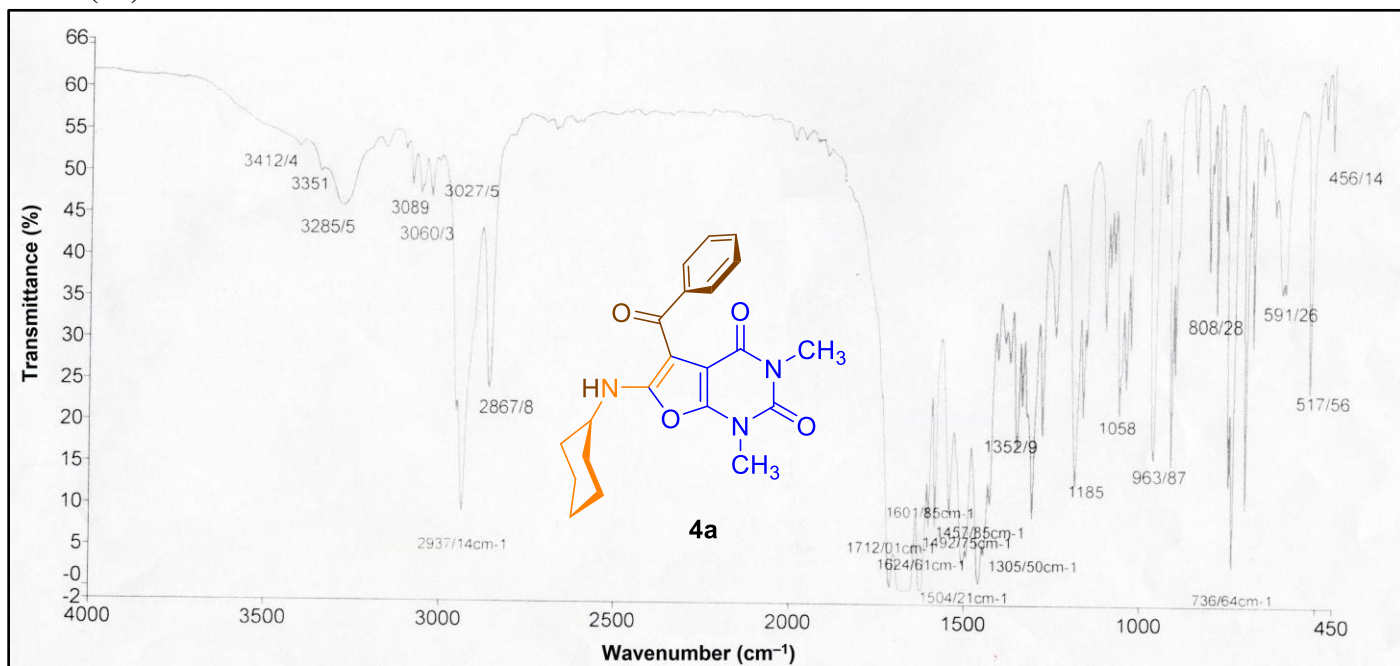

**<sup>1</sup>H NMR Spectrum of 5-benzoyl-6-(cyclohexylamino)-1,3-dimethylfuro[2,3-d]pyrimidine-2,4(1H,3H)-dione (4a)**

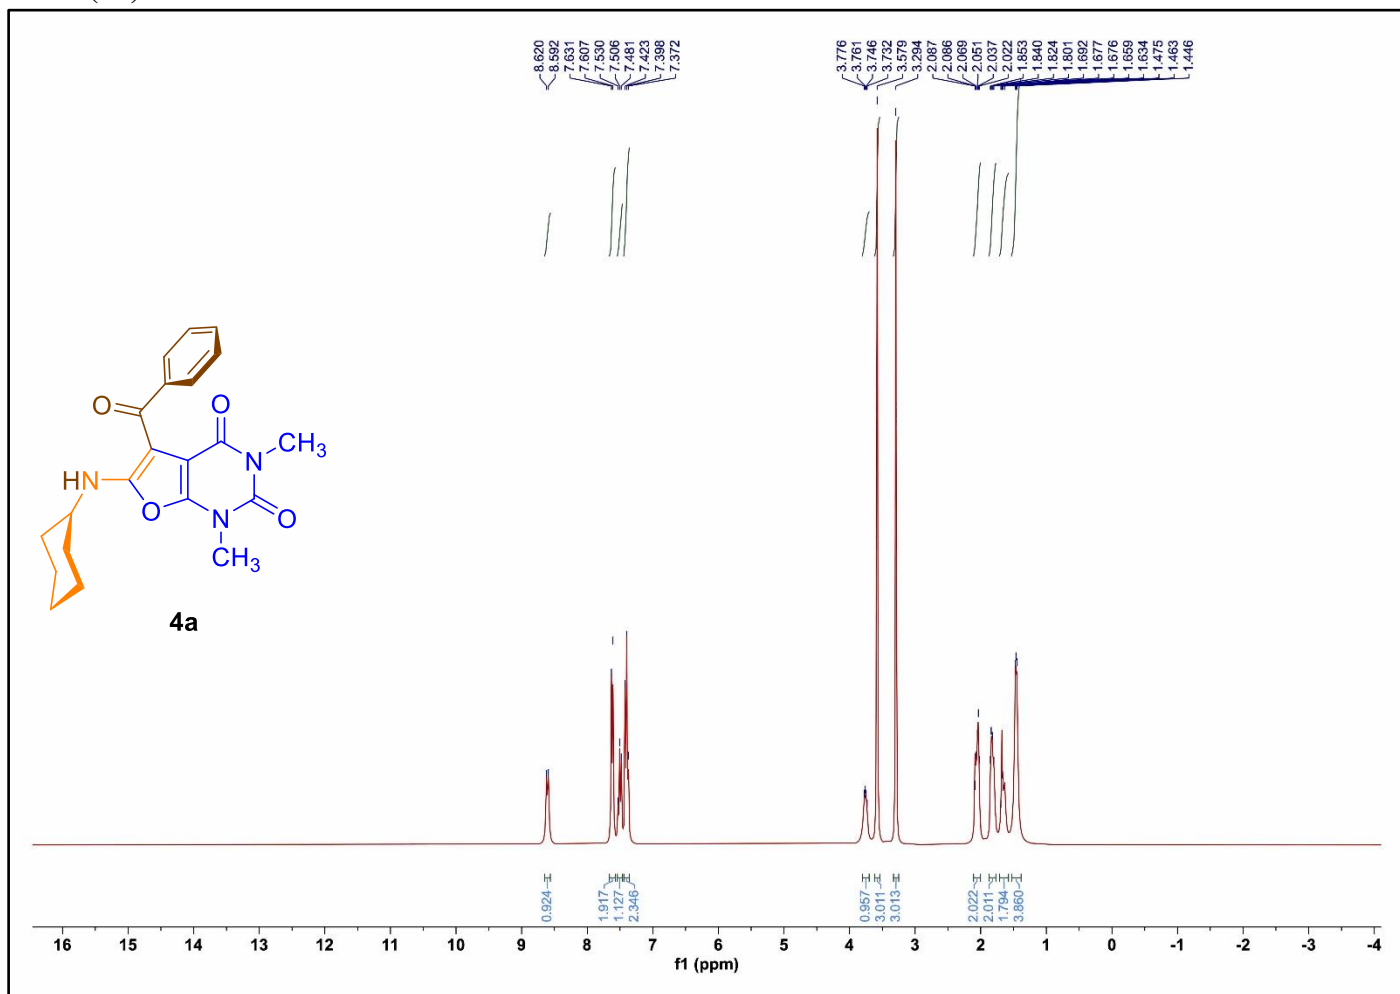

$^{13}\text{C}\{^1\text{H}\}$  NMR Spectrum of 5-benzoyl-6-(cyclohexylamino)-1,3-dimethylfuro[2,3-*d*]pyrimidine-2,4(1*H*,3*H*)-dione (4a)

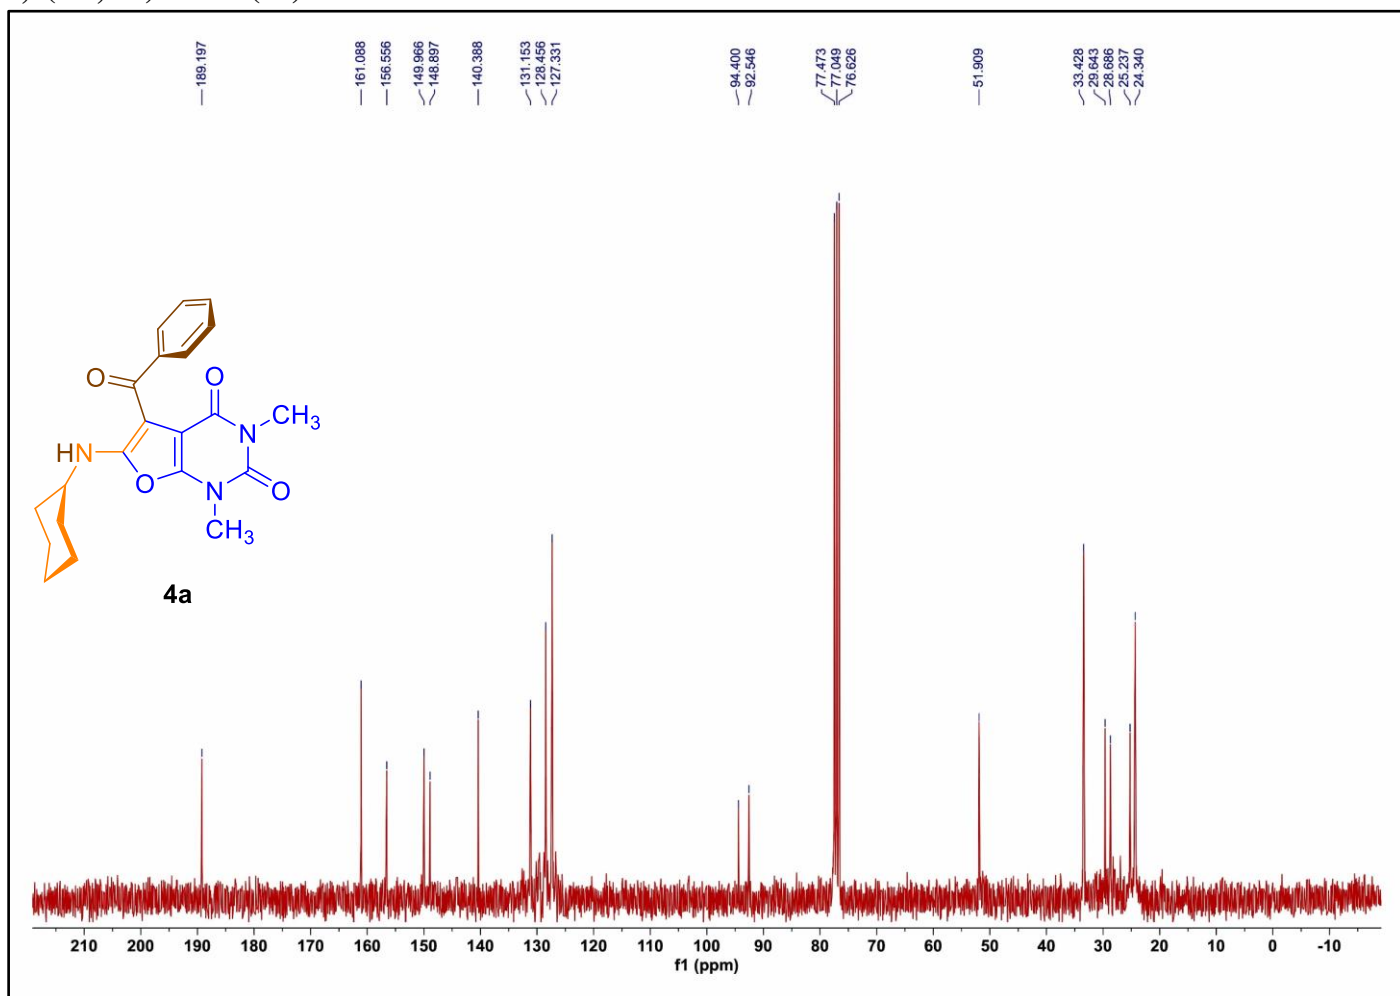

**FT-IR Spectrum of 5-(4-bromobenzoyl)-6-(cyclohexylamino)-1,3-dimethylfuro[2,3-d]pyrimidine-2,4(1H,3H)-dione (4b)**

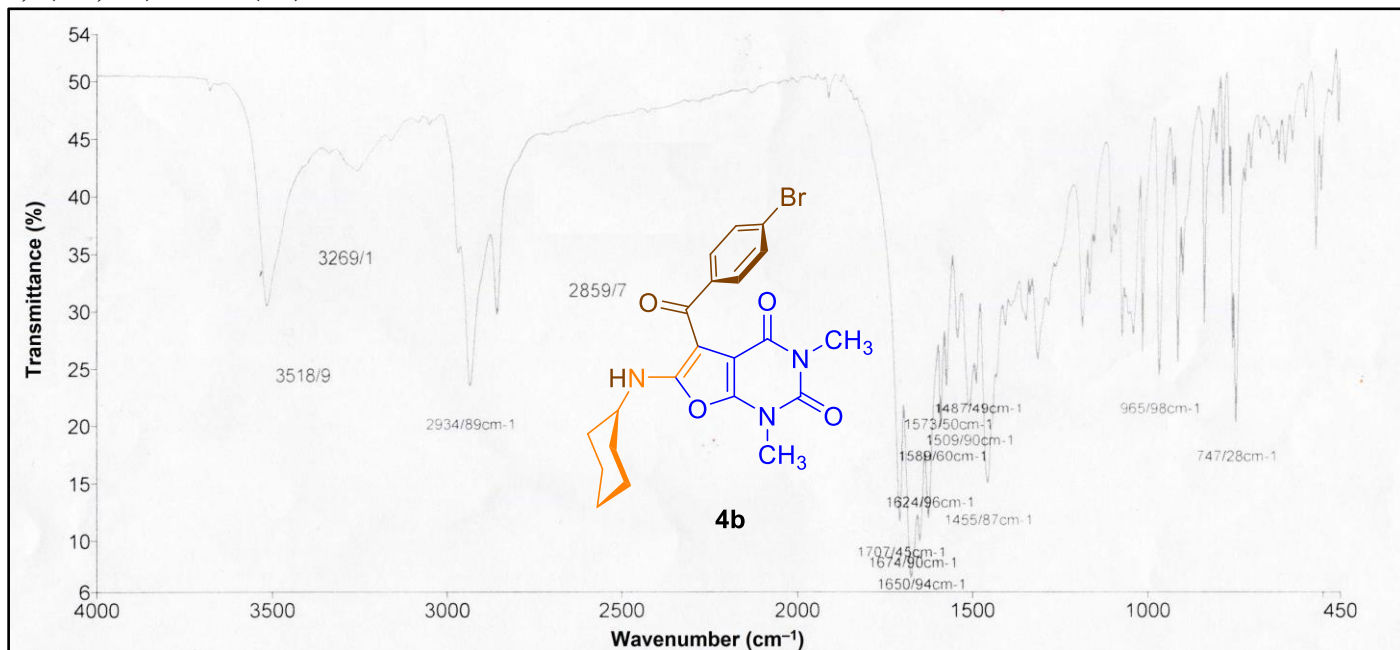

**<sup>1</sup>H NMR Spectrum of 5-(4-bromobenzoyl)-6-(cyclohexylamino)-1,3-dimethylfuro[2,3-d]pyrimidine-2,4(1H,3H)-dione (4b)**

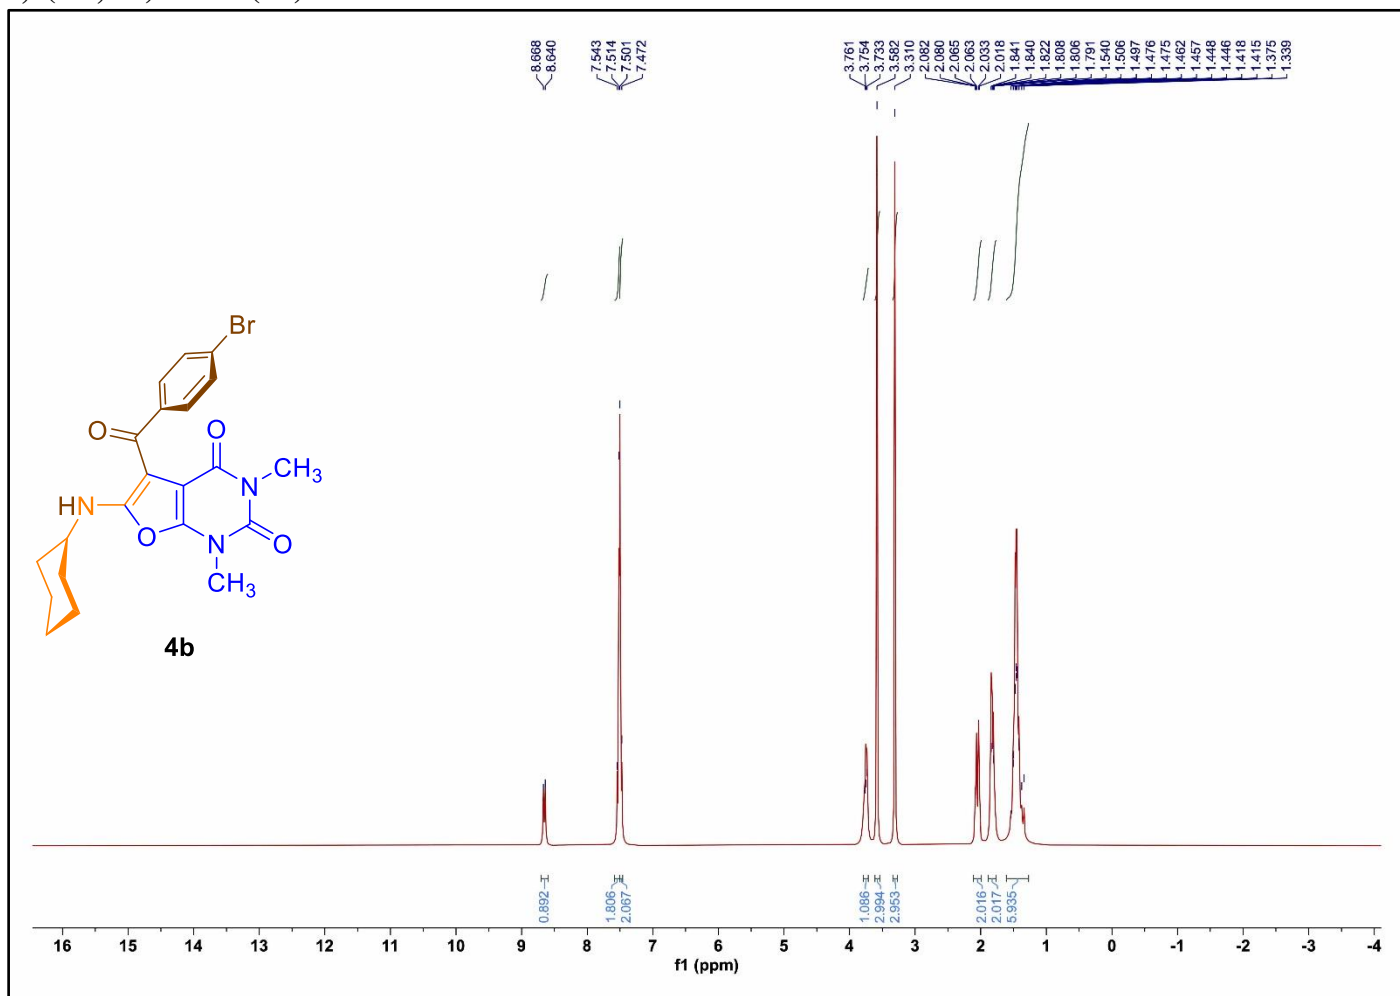



$^{13}\text{C}\{^1\text{H}\}$  NMR Spectrum of 5-(4-bromobenzoyl)-6-(cyclohexylamino)-1,3-dimethylfuro[2,3-*d*]pyrimidine-2,4(1*H*,3*H*)-dione (4b)

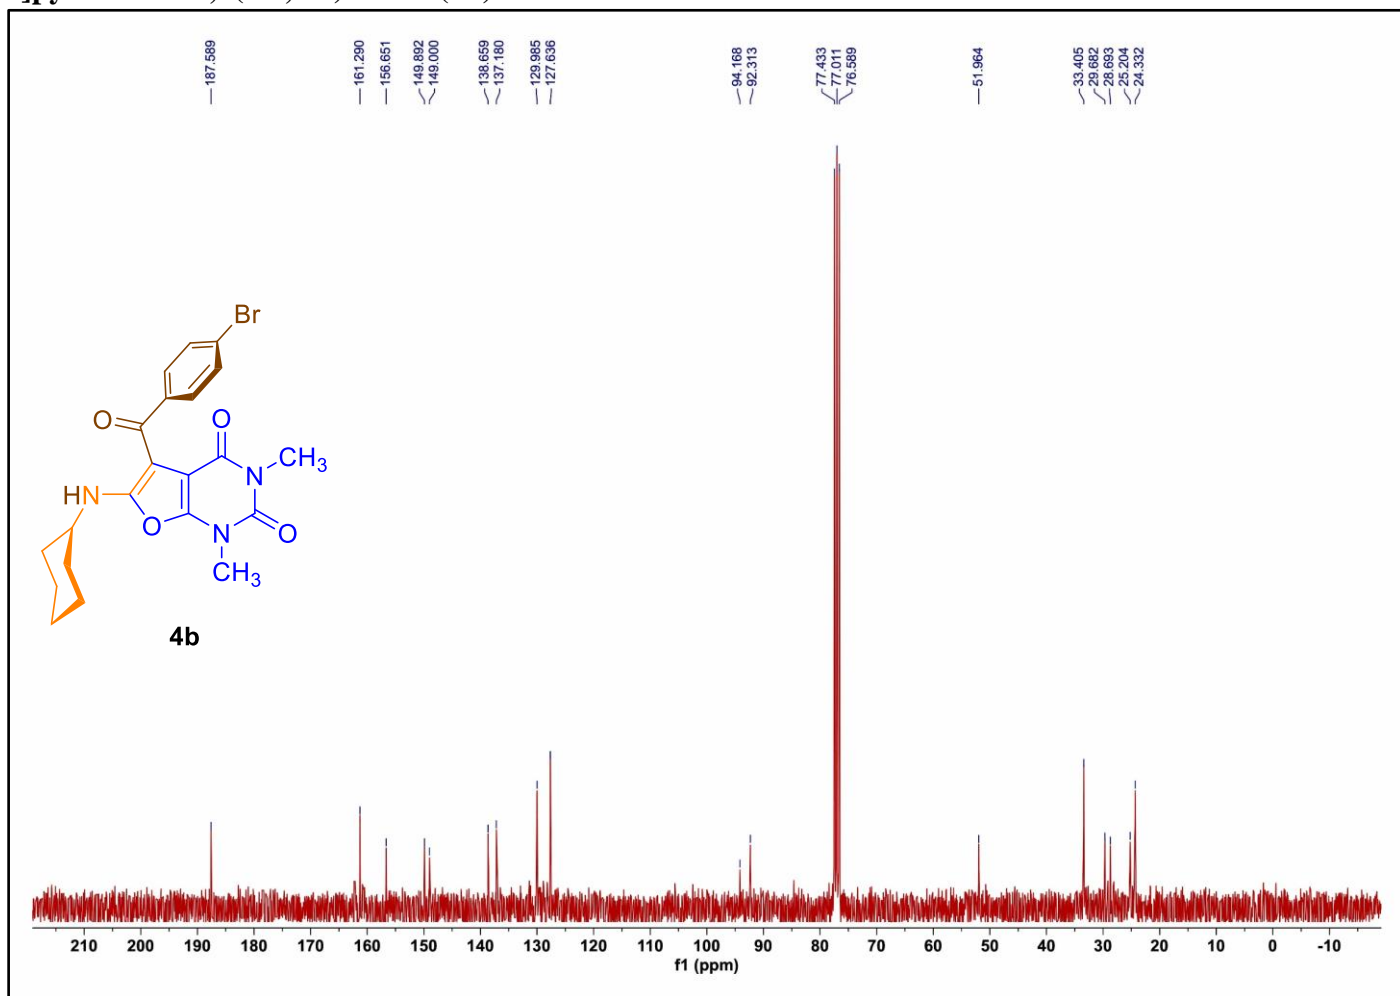

**FT-IR Spectrum of 5-(4-chlorobenzoyl)-6-(cyclohexylamino)-1,3-dimethylfuro[2,3-d]pyrimidine-2,4(1H,3H)-dione (4c)**

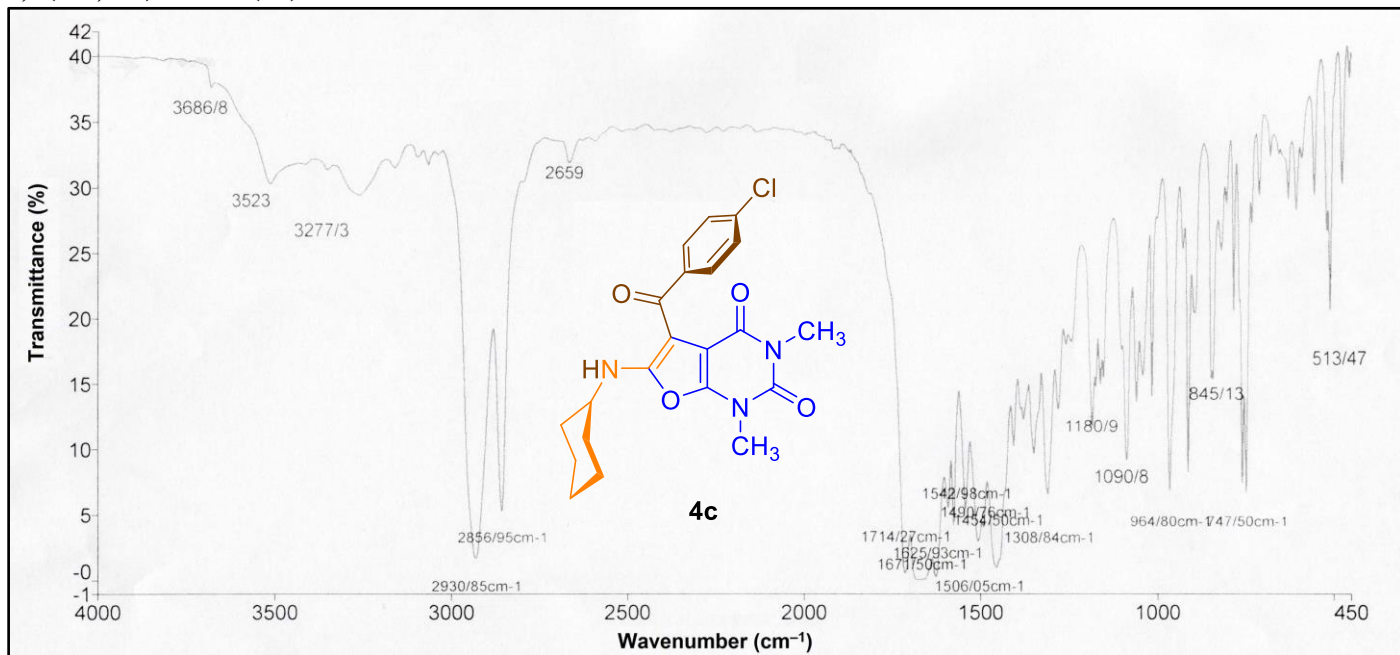

**<sup>1</sup>H NMR Spectrum of 5-(4-chlorobenzoyl)-6-(cyclohexylamino)-1,3-dimethylfuro[2,3-d]pyrimidine-2,4(1H,3H)-dione (4c)**

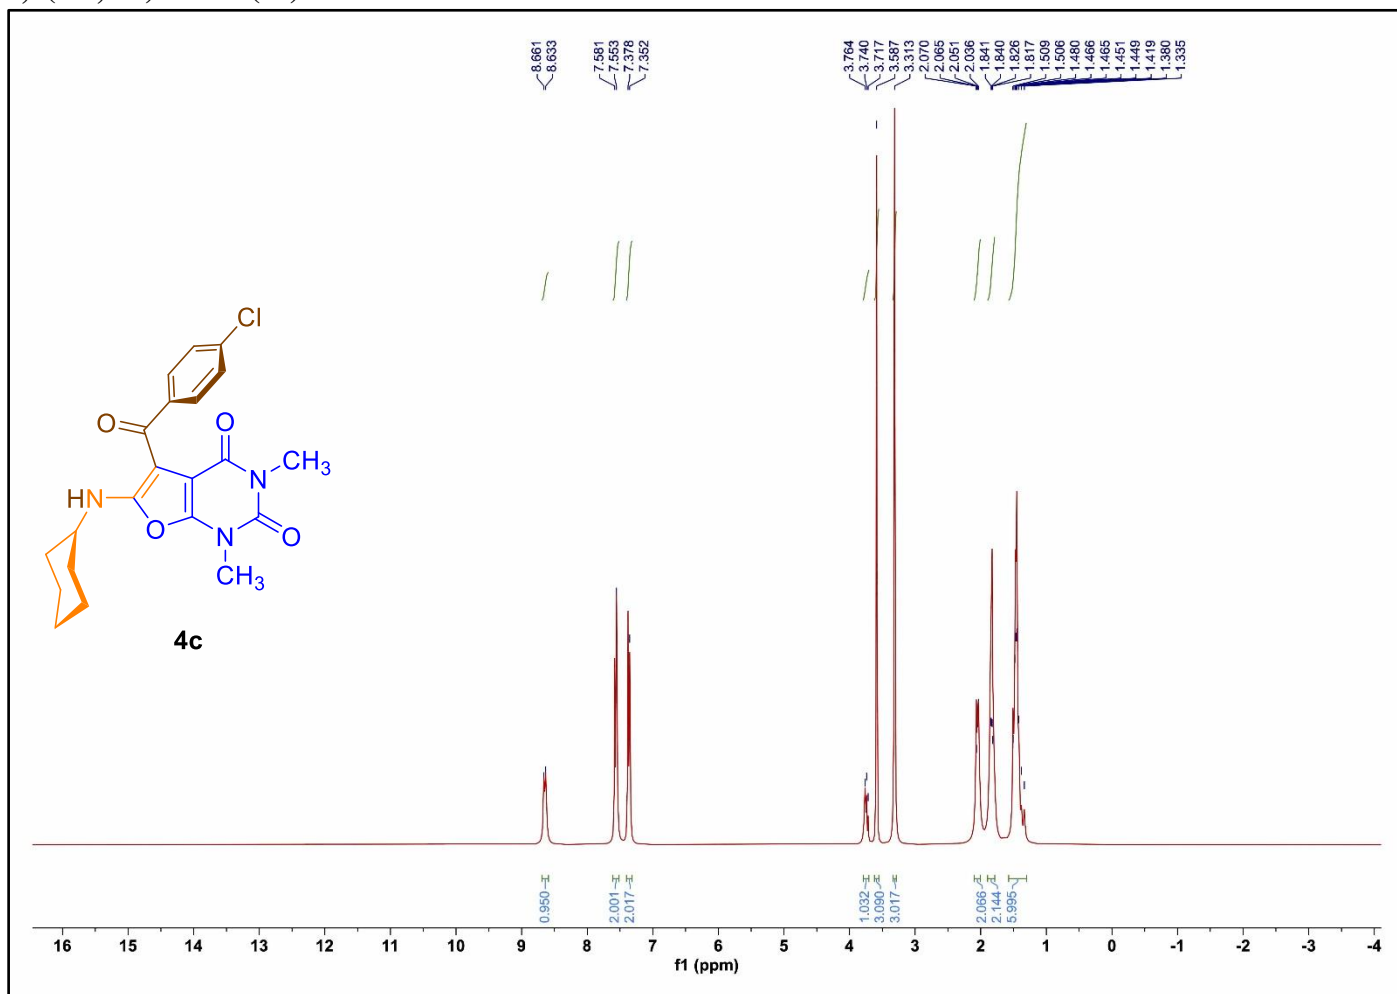

$^{13}\text{C}\{^1\text{H}\}$  NMR Spectrum of 5-(4-chlorobenzoyl)-6-(cyclohexylamino)-1,3-dimethylfuro[2,3-*d*]pyrimidine-2,4(1*H*,3*H*)-dione (4c)

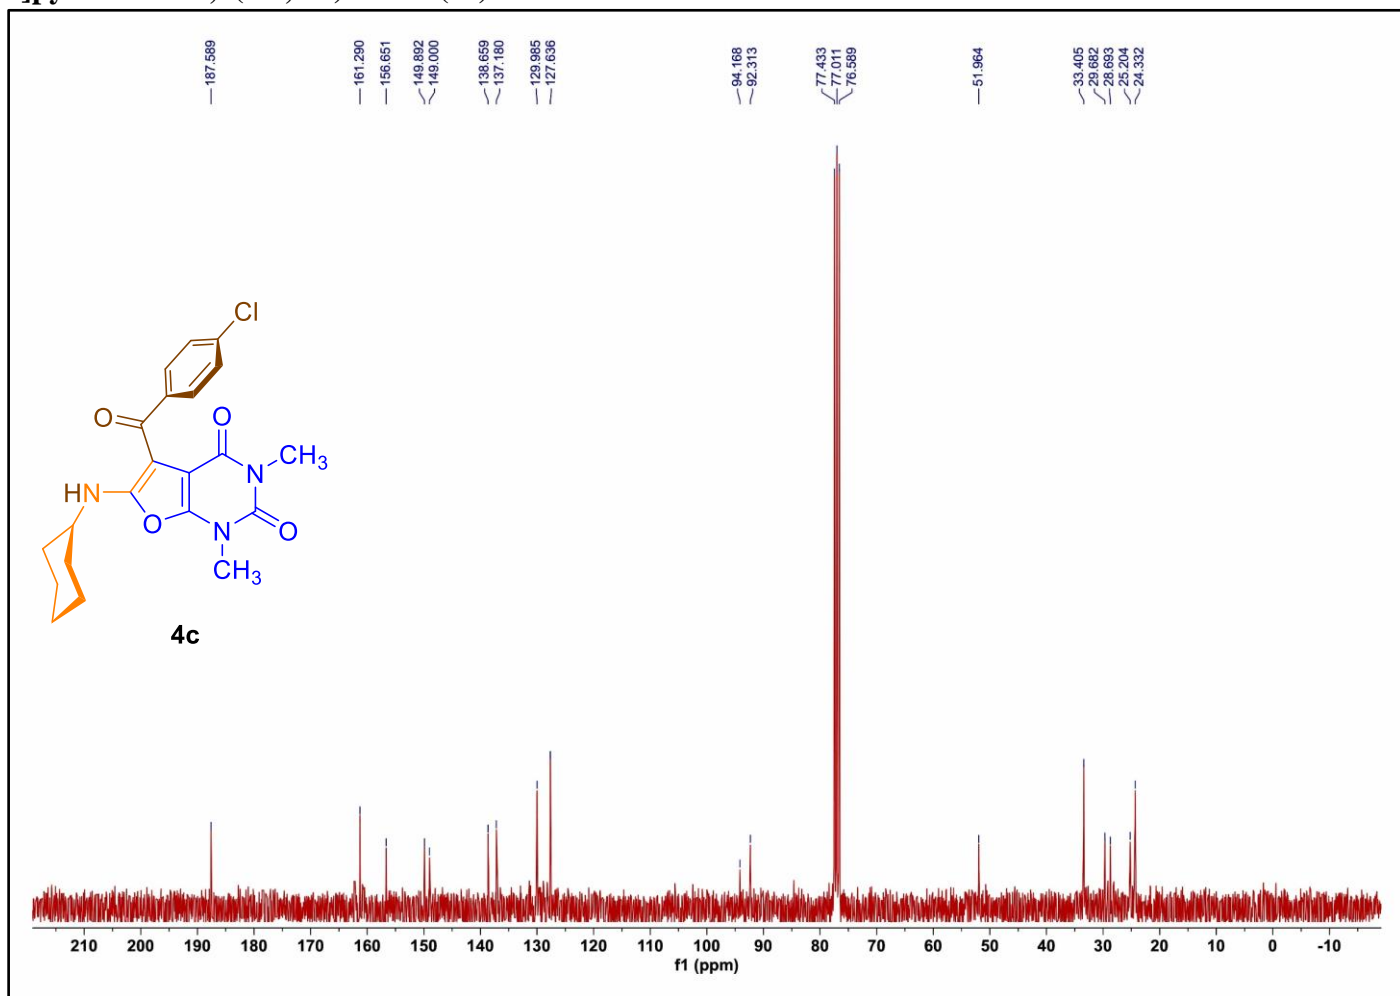

**FT-IR Spectrum of 5-(4-fluorobenzoyl)-6-(cyclohexylamino)-1,3-dimethylfuro[2,3-d]pyrimidine-2,4(1H,3H)-dione (4d)**

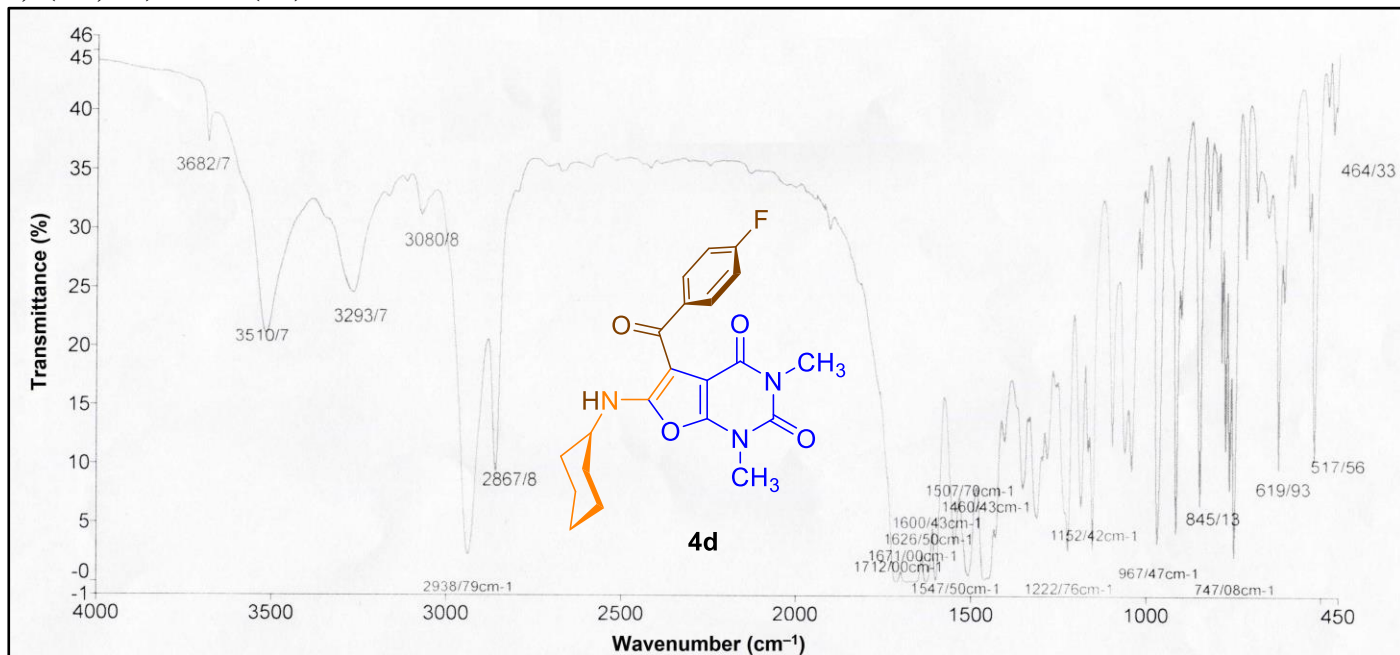

**<sup>1</sup>H NMR Spectrum of 5-(4-fluorobenzoyl)-6-(cyclohexylamino)-1,3-dimethylfuro[2,3-d]pyrimidine-2,4(1H,3H)-dione (4d)**

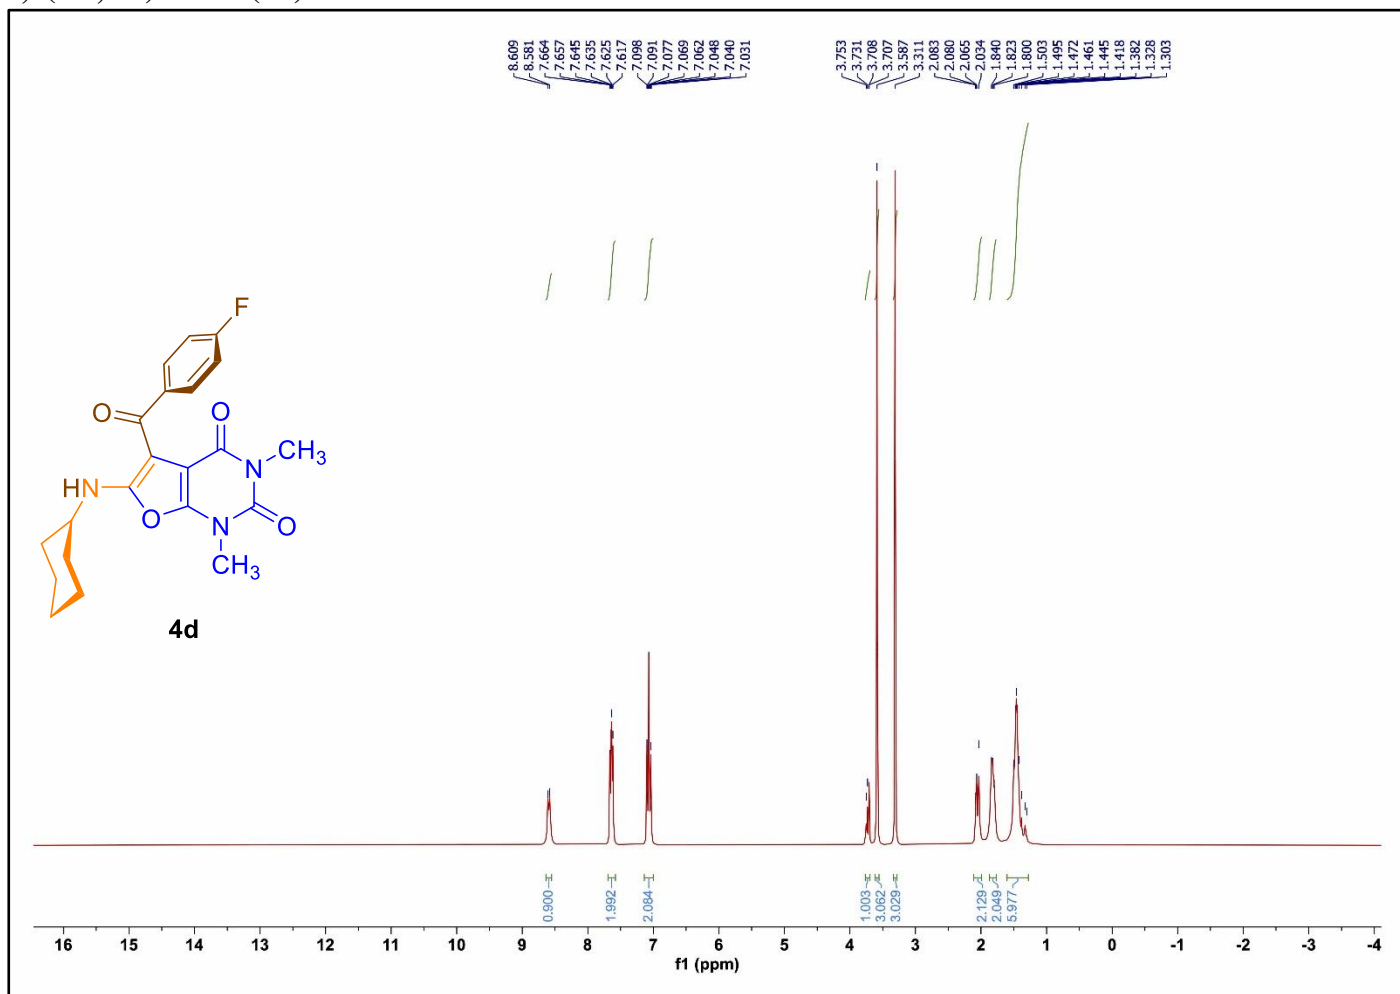



$^{13}\text{C}\{^1\text{H}\}$  NMR Spectrum of 5-(4-fluorobenzoyl)-6-(cyclohexylamino)-1,3-dimethylfuro[2,3-*d*]pyrimidine-2,4(1*H*,3*H*)-dione (4d)

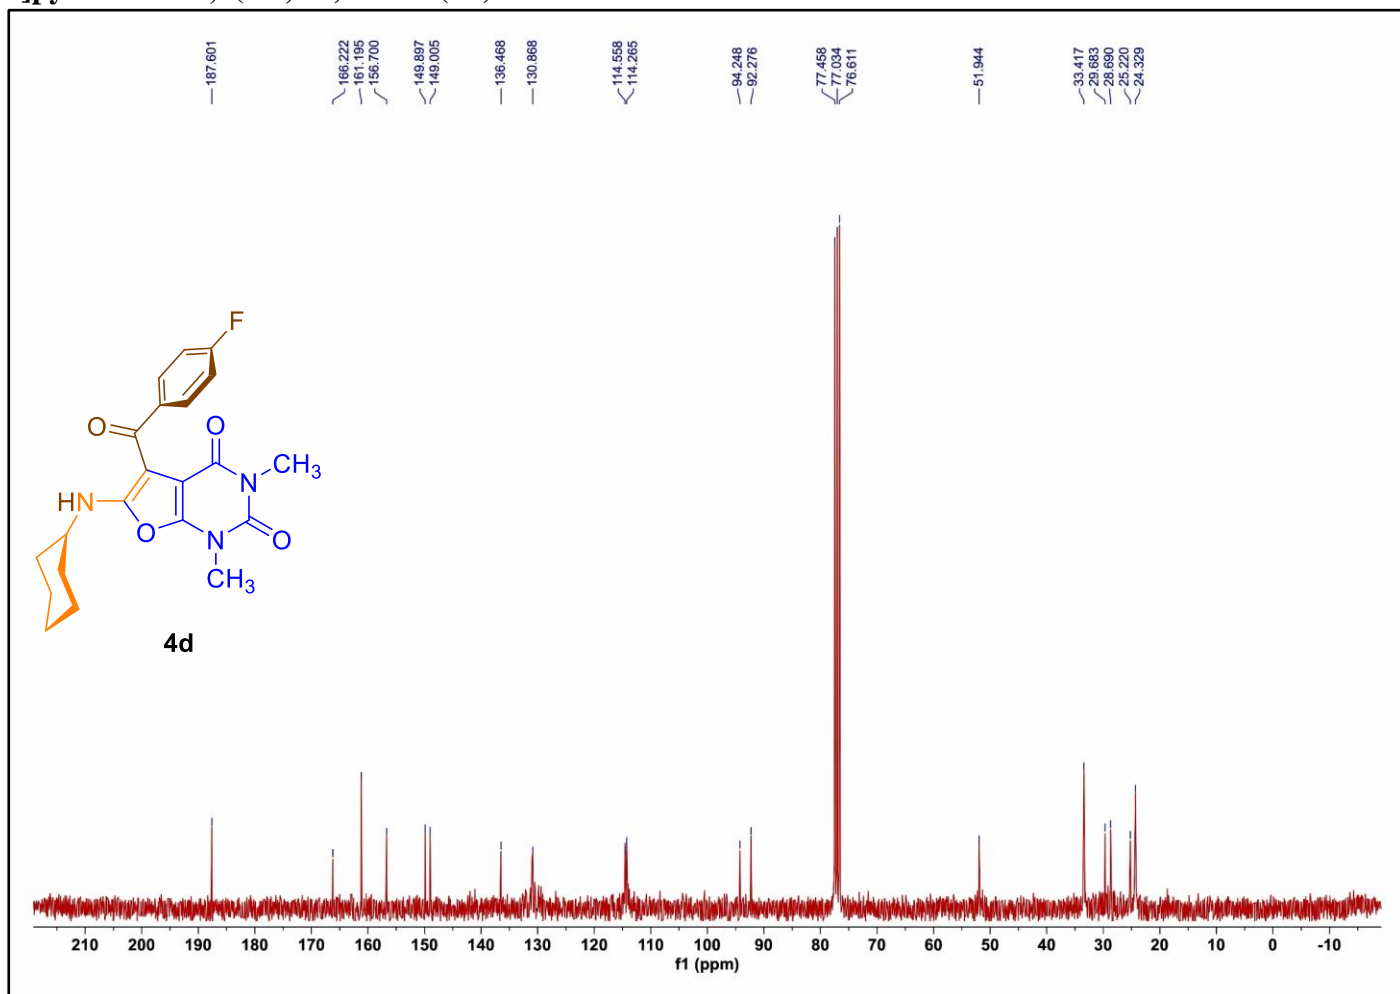

**FT-IR Spectrum of 5-(3-bromobenzoyl)-6-(cyclohexylamino)-1,3-dimethylfuro[2,3-d]pyrimidine-2,4(1H,3H)-dione (4e)**

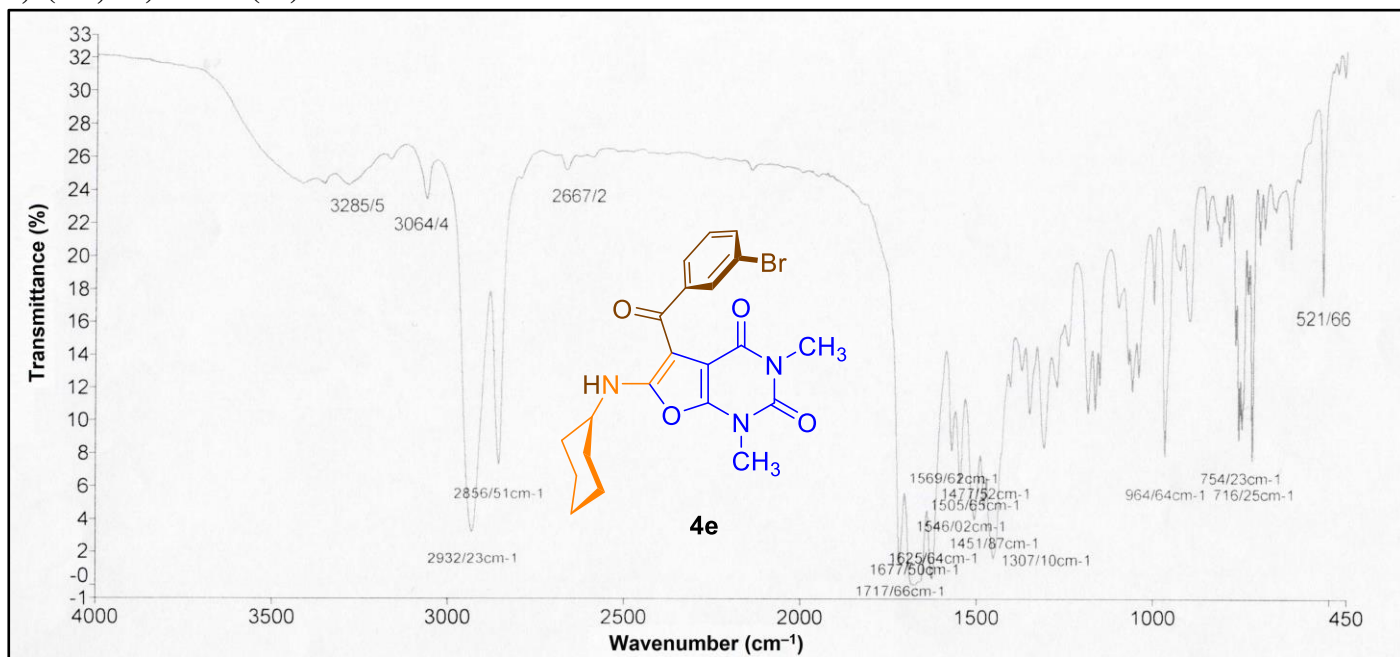

**<sup>1</sup>H NMR Spectrum of 5-(3-bromobenzoyl)-6-(cyclohexylamino)-1,3-dimethylfuro[2,3-*d*]pyrimidine-2,4(1*H*,3*H*)-dione (4e)**

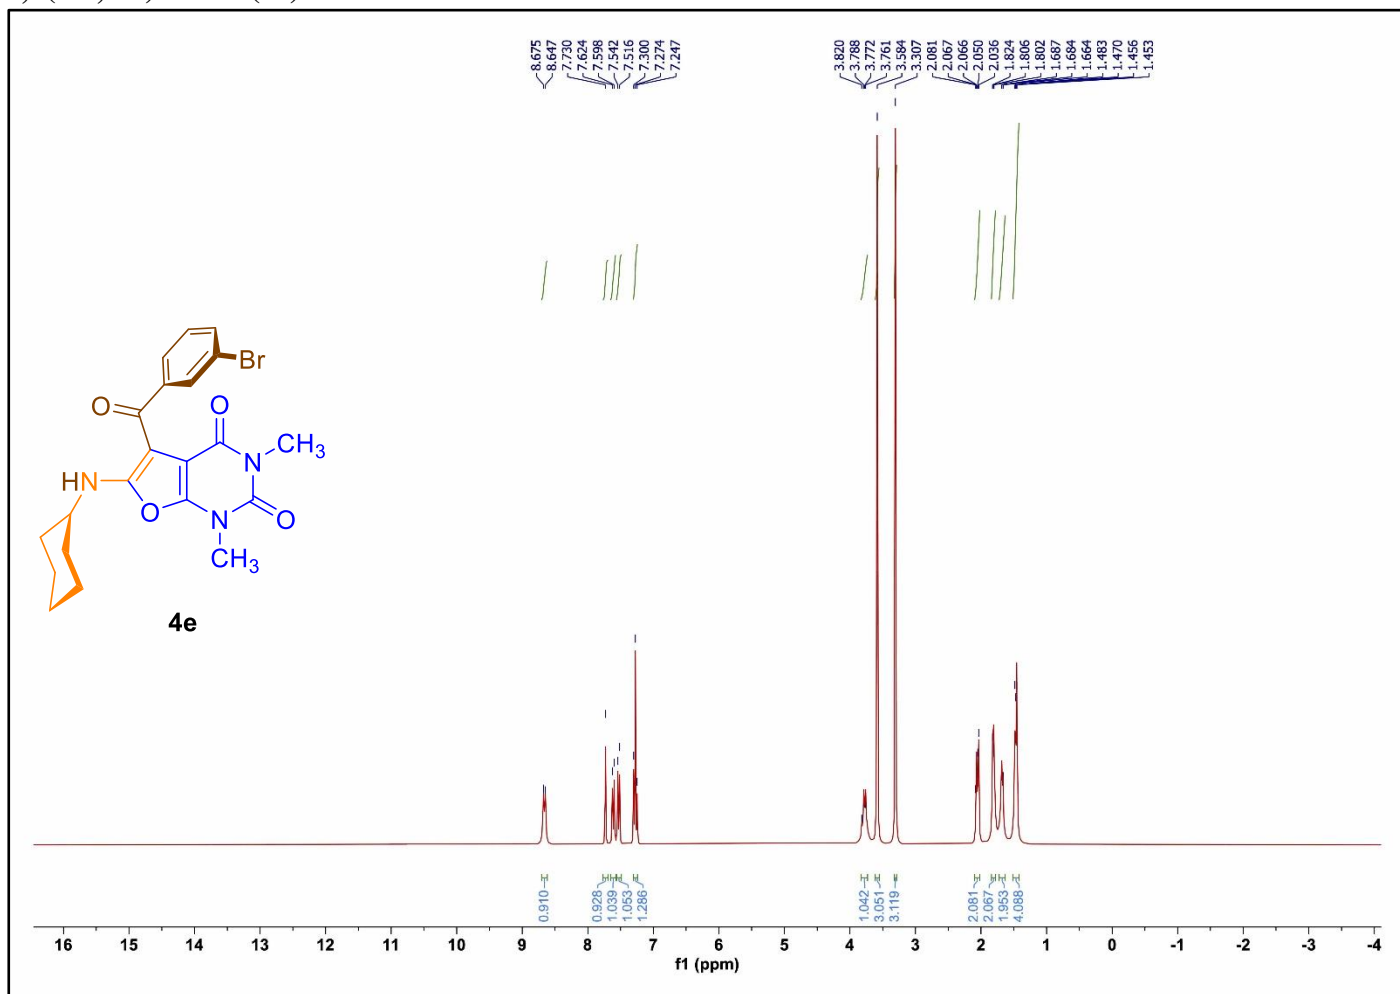

$^{13}\text{C}\{^1\text{H}\}$  NMR Spectrum of 5-(3-bromobenzoyl)-6-(cyclohexylamino)-1,3-dimethylfuro[2,3-*d*]pyrimidine-2,4(1*H*,3*H*)-dione (4e)

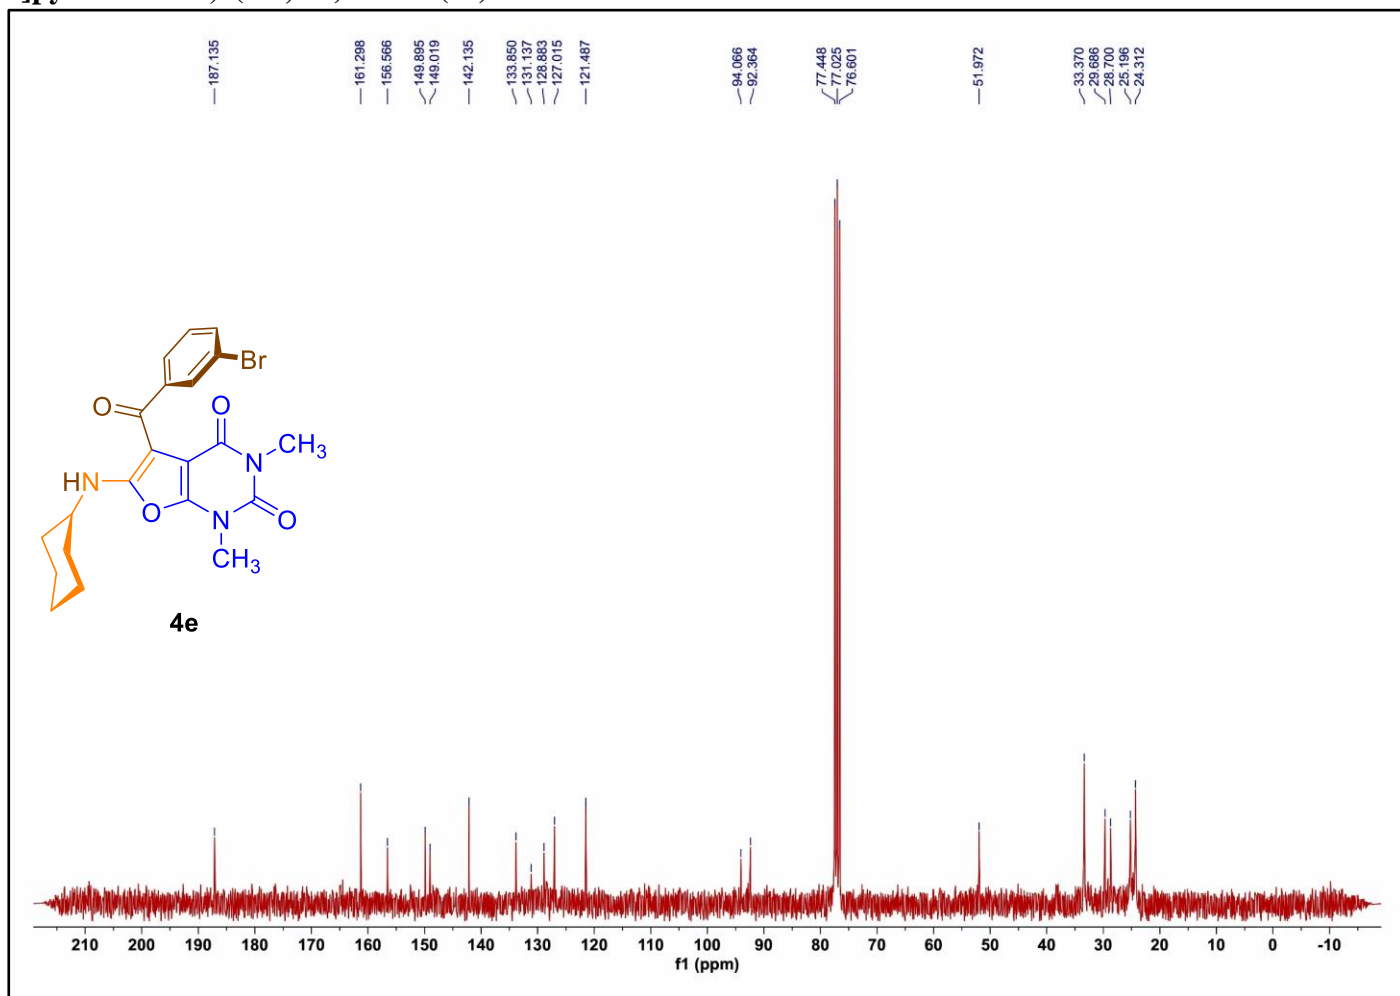

**FT-IR Spectrum of 5-(4-hydroxy-3-methoxybenzoyl)-6-(cyclohexylamino)-1,3-dimethylfuro[2,3-d]pyrimidine-2,4(1H,3H)-dione (4f)**

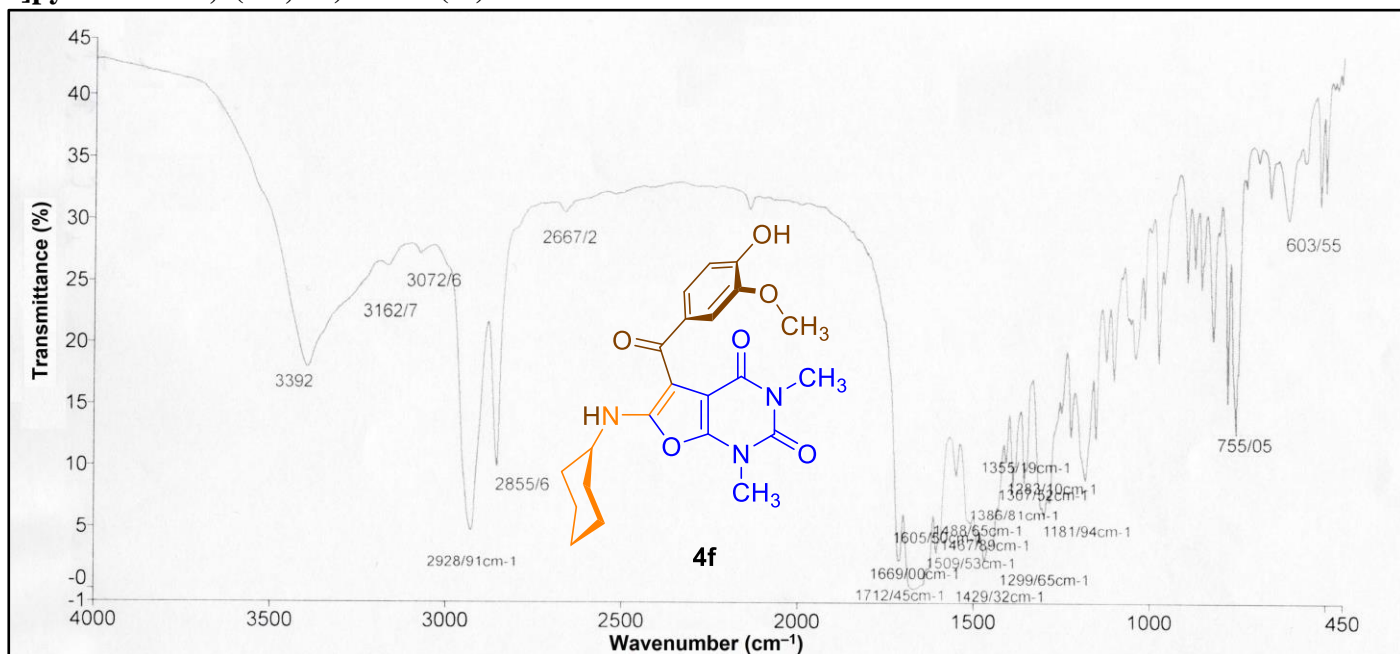

**<sup>1</sup>H NMR Spectrum of 5-(4-hydroxy-3-methoxybenzoyl)-6-(cyclohexylamino)-1,3-dimethylfuro[2,3-d]pyrimidine-2,4(1H,3H)-dione (4f)**

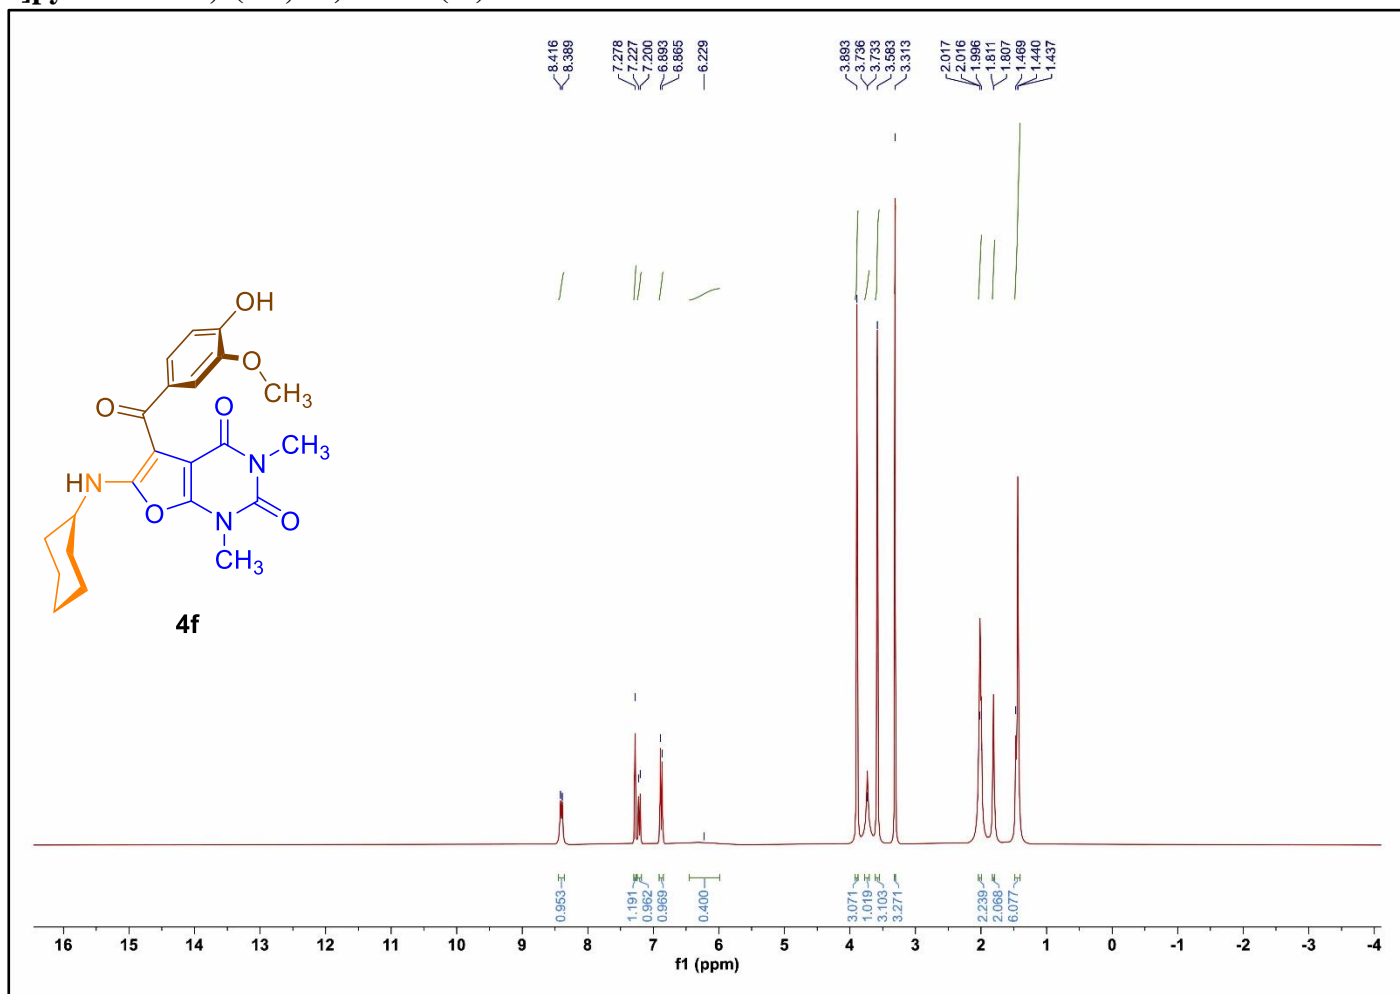

$^{13}\text{C}\{^1\text{H}\}$  NMR Spectrum of 5-(4-hydroxy-3-methoxybenzoyl)-6-(cyclohexylamino)-1,3-dimethylfuro[2,3-*d*]pyrimidine-2,4(1*H*,3*H*)-dione (4f)

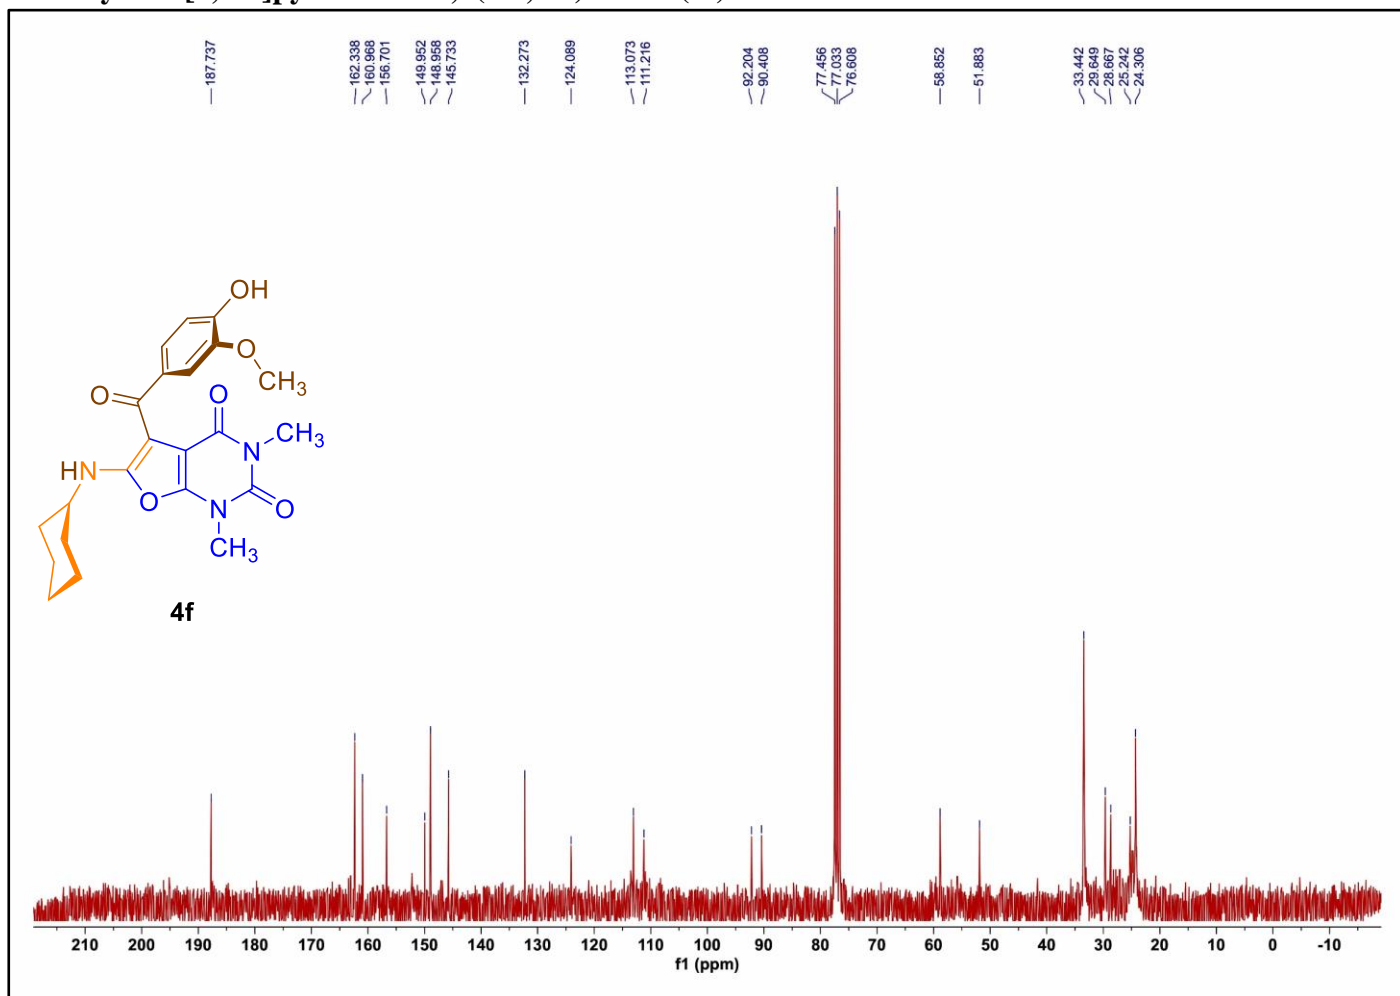



**FT-IR Spectrum of 5-(3,4-methylenedioxybenzoyl)-6-(cyclohexylamino)-1,3-dimethylfuro[2,3-d]pyrimidine-2,4(1H,3H)-dione (4g)**

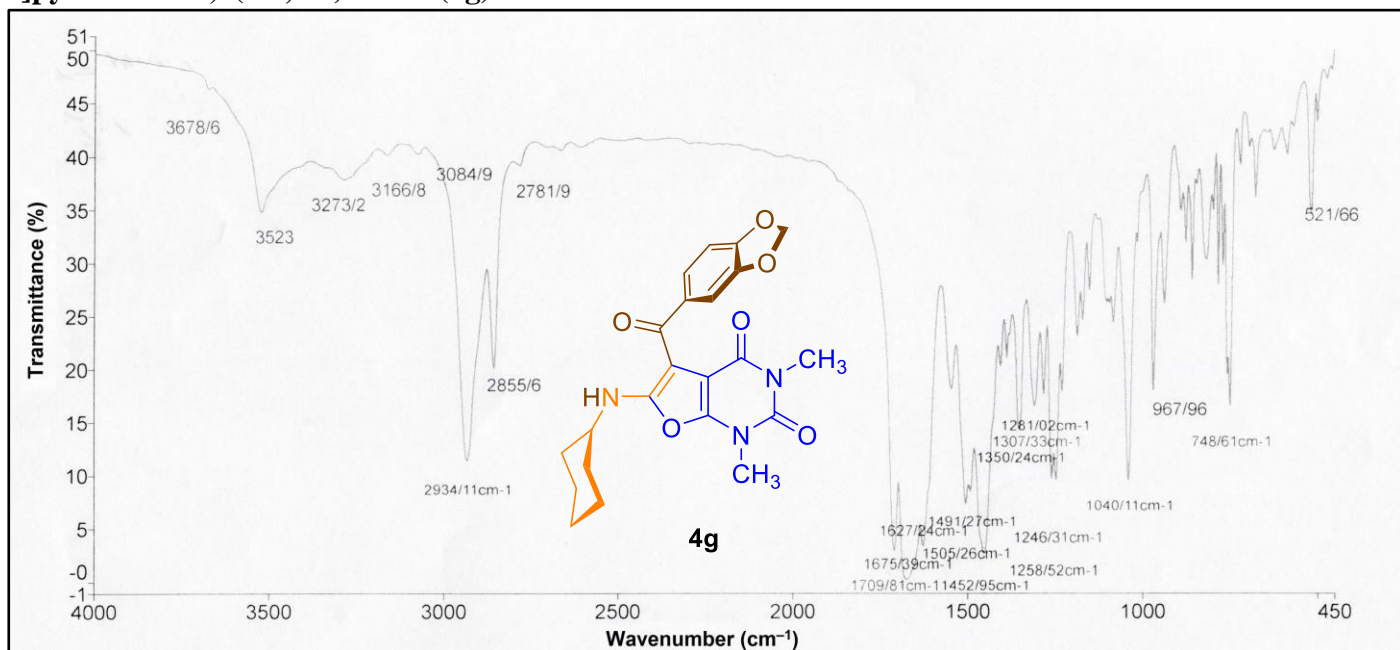

**<sup>1</sup>H NMR Spectrum of 5-(3,4-methylenedioxybenzoyl)-6-(cyclohexylamino)-1,3-dimethylfuro[2,3-d]pyrimidine-2,4(1H,3H)-dione (4g)**

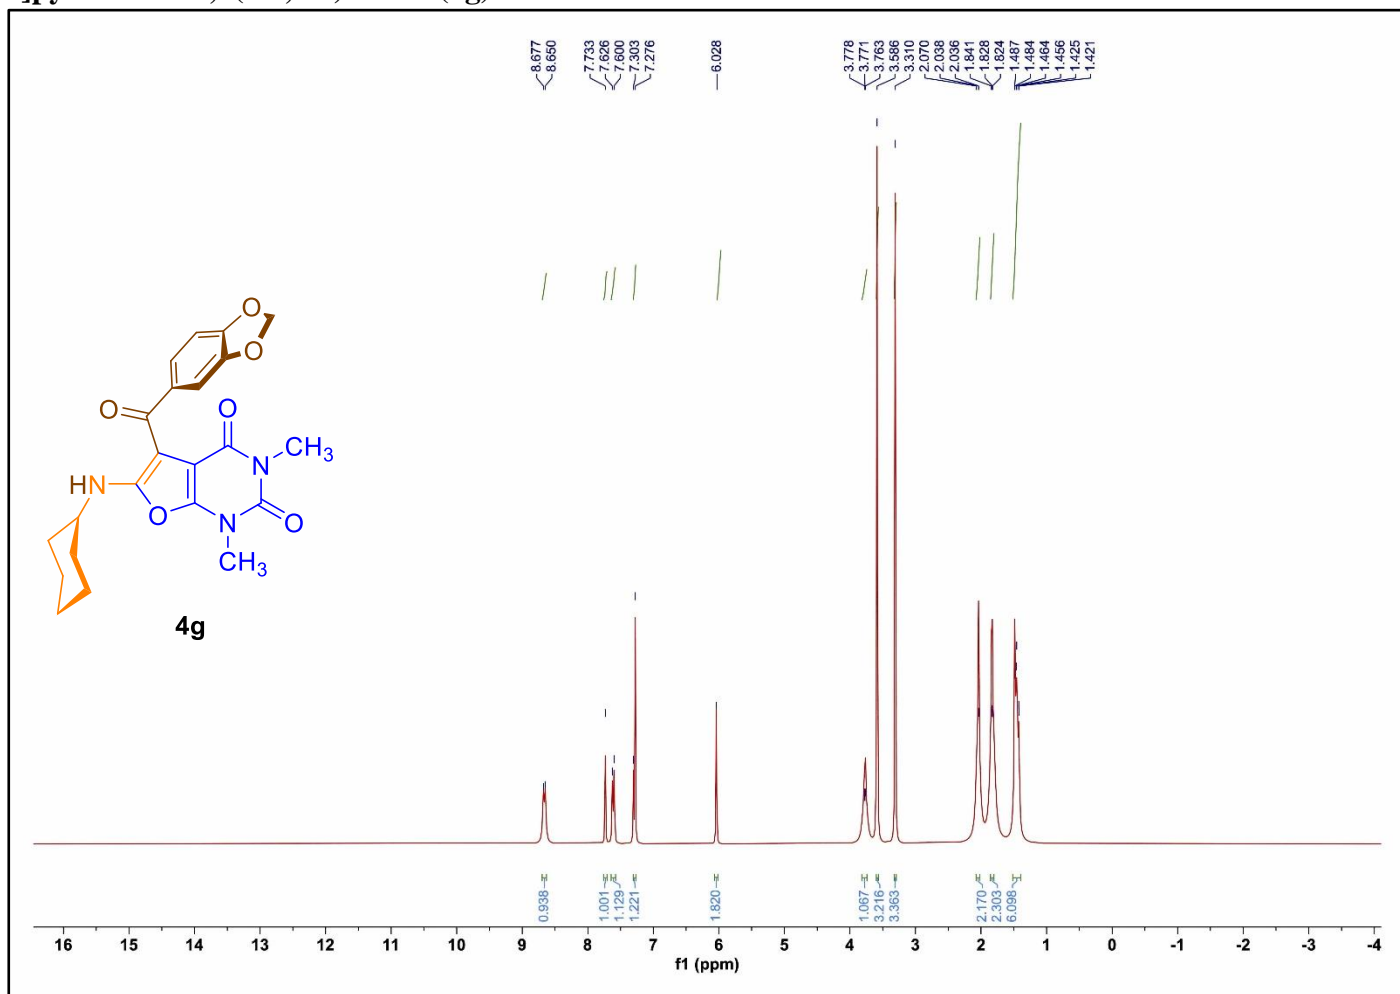

**$^{13}\text{C}\{^1\text{H}\}$  NMR Spectrum of 5-(3,4-methylenedioxybenzoyl)-6-(cyclohexylamino)-1,3-dimethylfuro[2,3-*d*]pyrimidine-2,4(1*H*,3*H*)-dione (4g)**

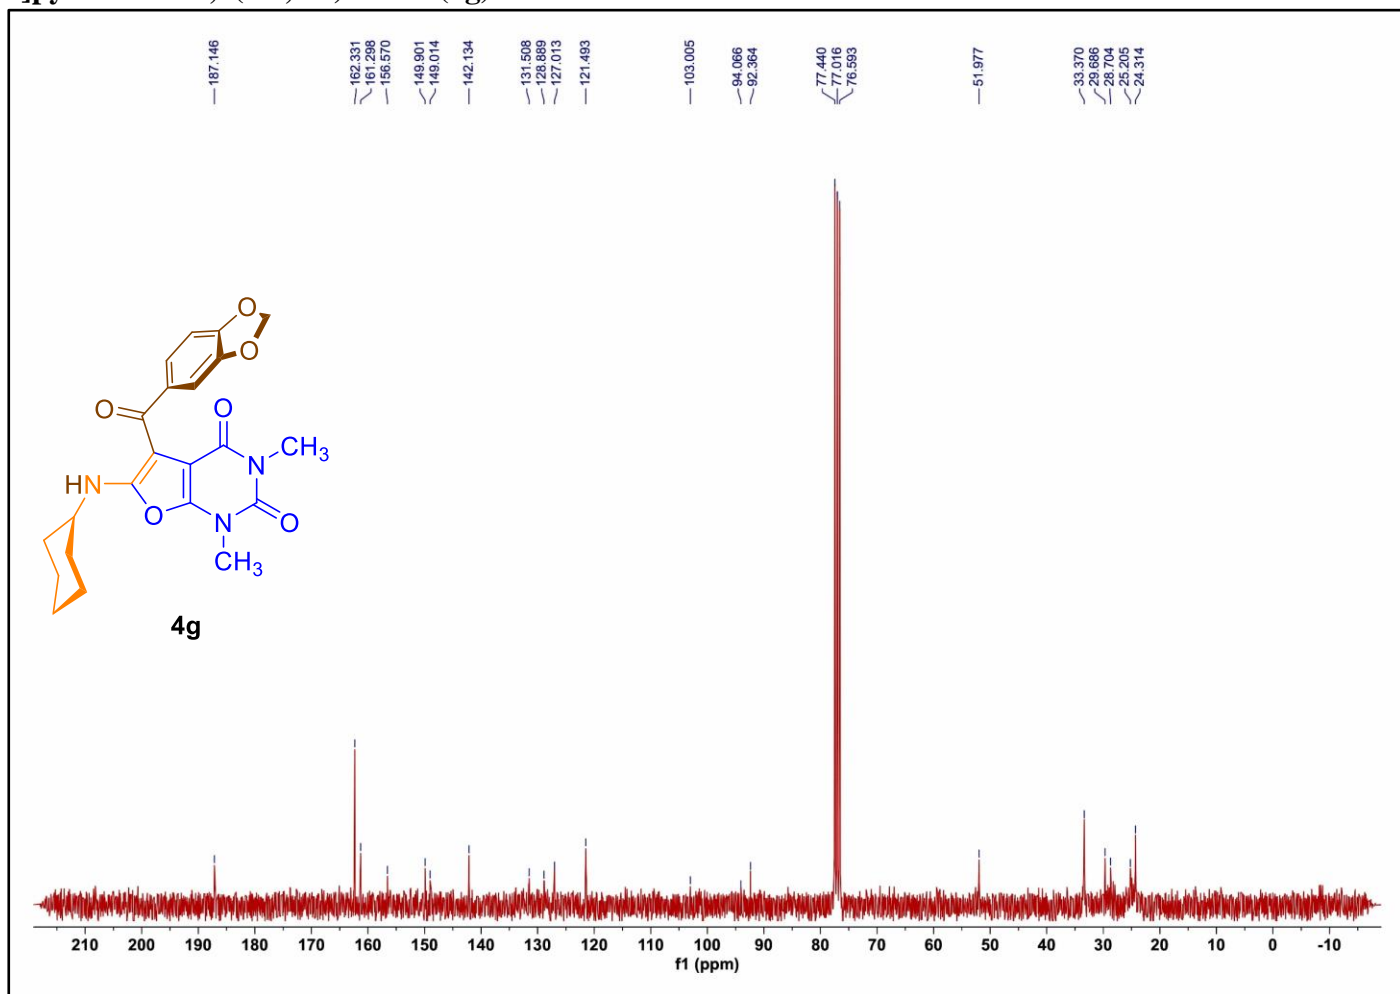

**FT-IR Spectrum of 5-benzoyl-6-(*tert*-butylamino)-1,3-dimethylfuro[2,3-*d*]pyrimidine-2,4(1*H*,3*H*)-dione (4h)**

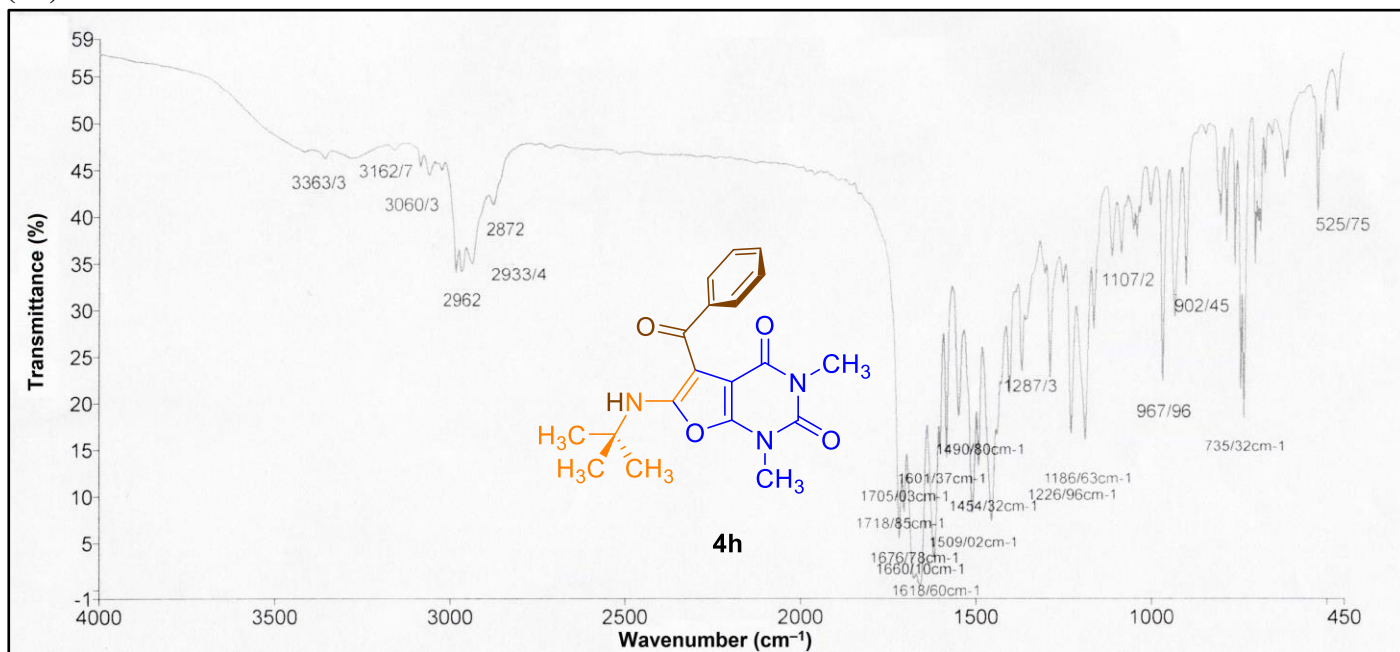

**<sup>1</sup>H NMR Spectrum of 5-benzoyl-6-(*tert*-butylamino)-1,3-dimethylfuro[2,3-*d*]pyrimidine-2,4(1*H*,3*H*)-dione (4h)**

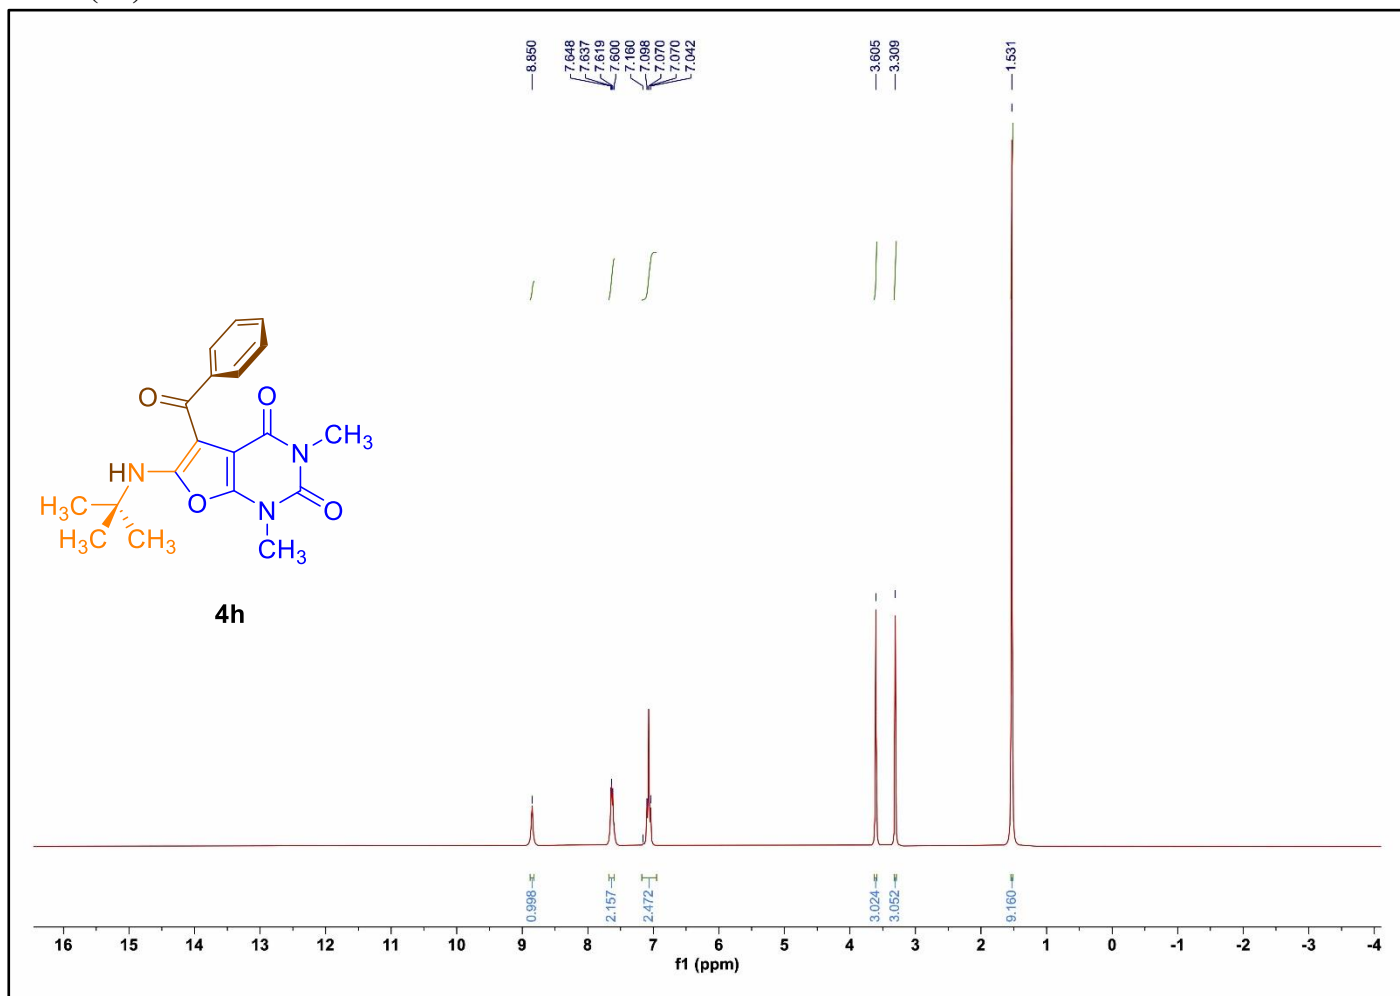

$^{13}\text{C}\{^1\text{H}\}$  NMR Spectrum of 5-benzoyl-6-(*tert*-butylamino)-1,3-dimethylfuro[2,3-*d*]pyrimidine-2,4(1*H*,3*H*)-dione (4h)

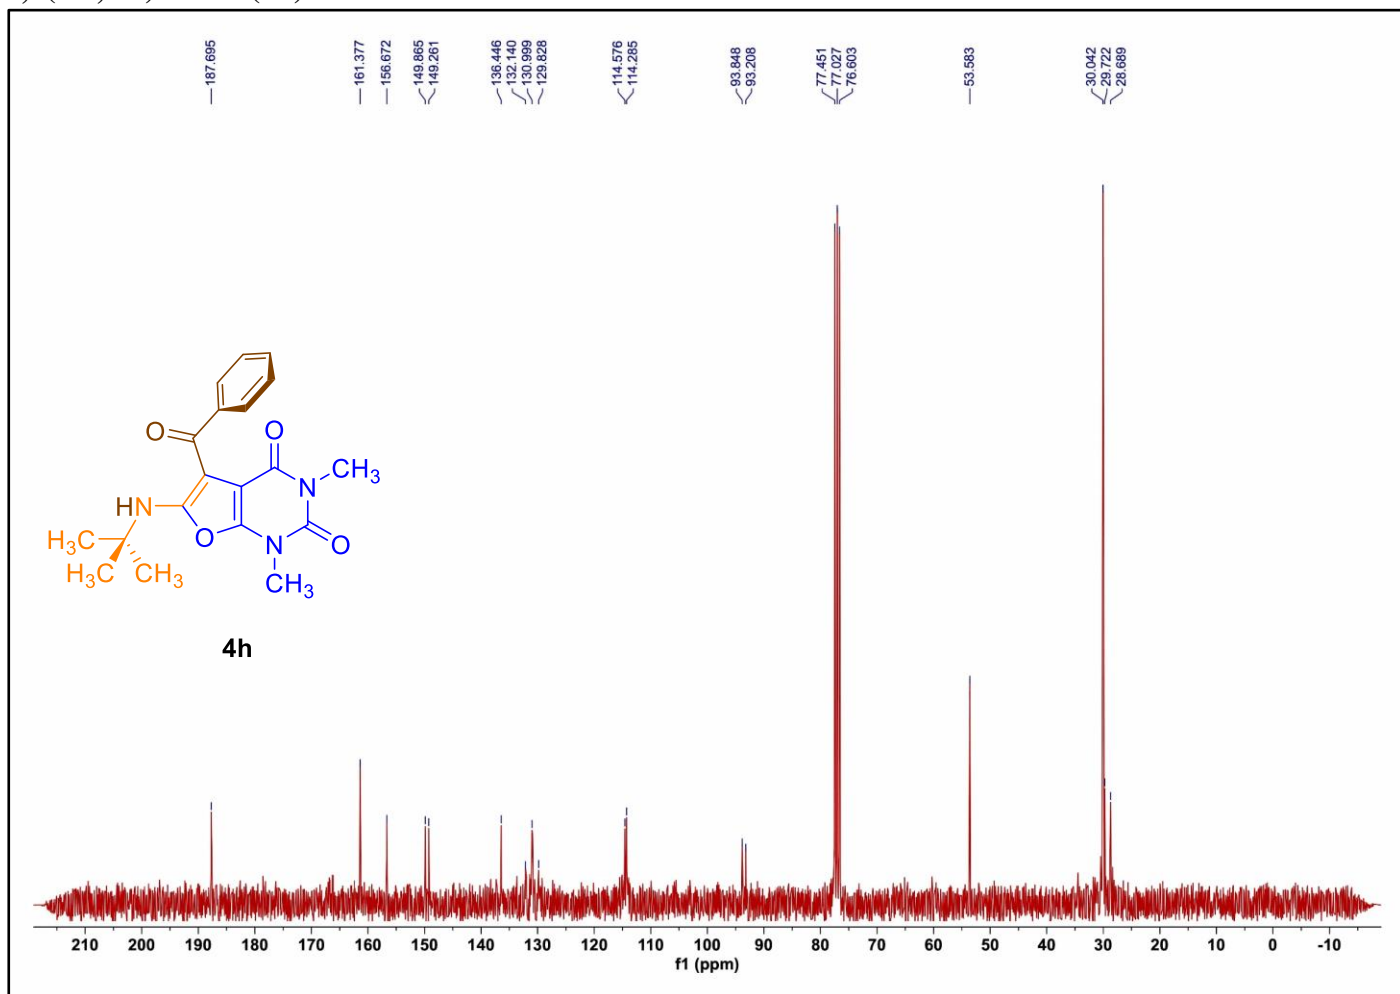

**FT-IR Spectrum of 5-(4-bromobenzoyl)-6-(*tert*-butylamino)-1,3-dimethylfuro[2,3-*d*]pyrimidine-2,4(1*H*,3*H*)-dione (4i)**

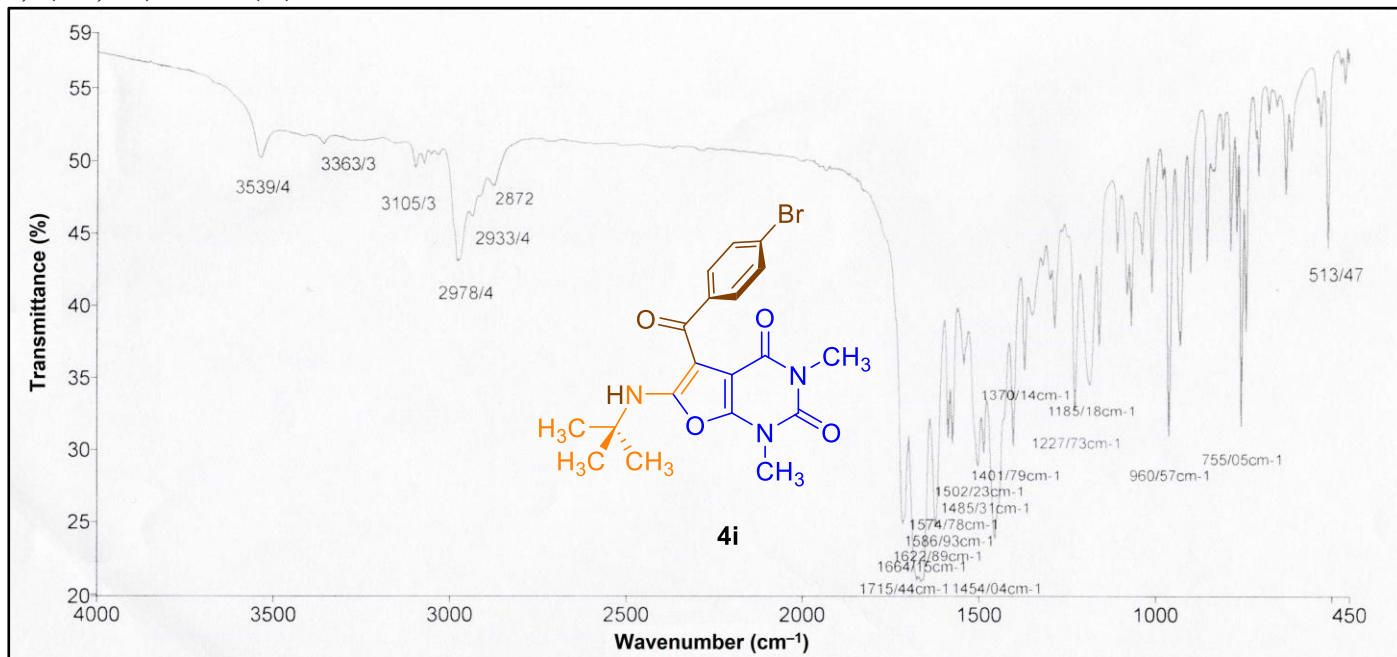



**<sup>1</sup>H NMR Spectrum of 5-(4-bromobenzoyl)-6-(*tert*-butylamino)-1,3-dimethylfuro[2,3-*d*]pyrimidine-2,4(1*H*,3*H*)-dione (4i)**

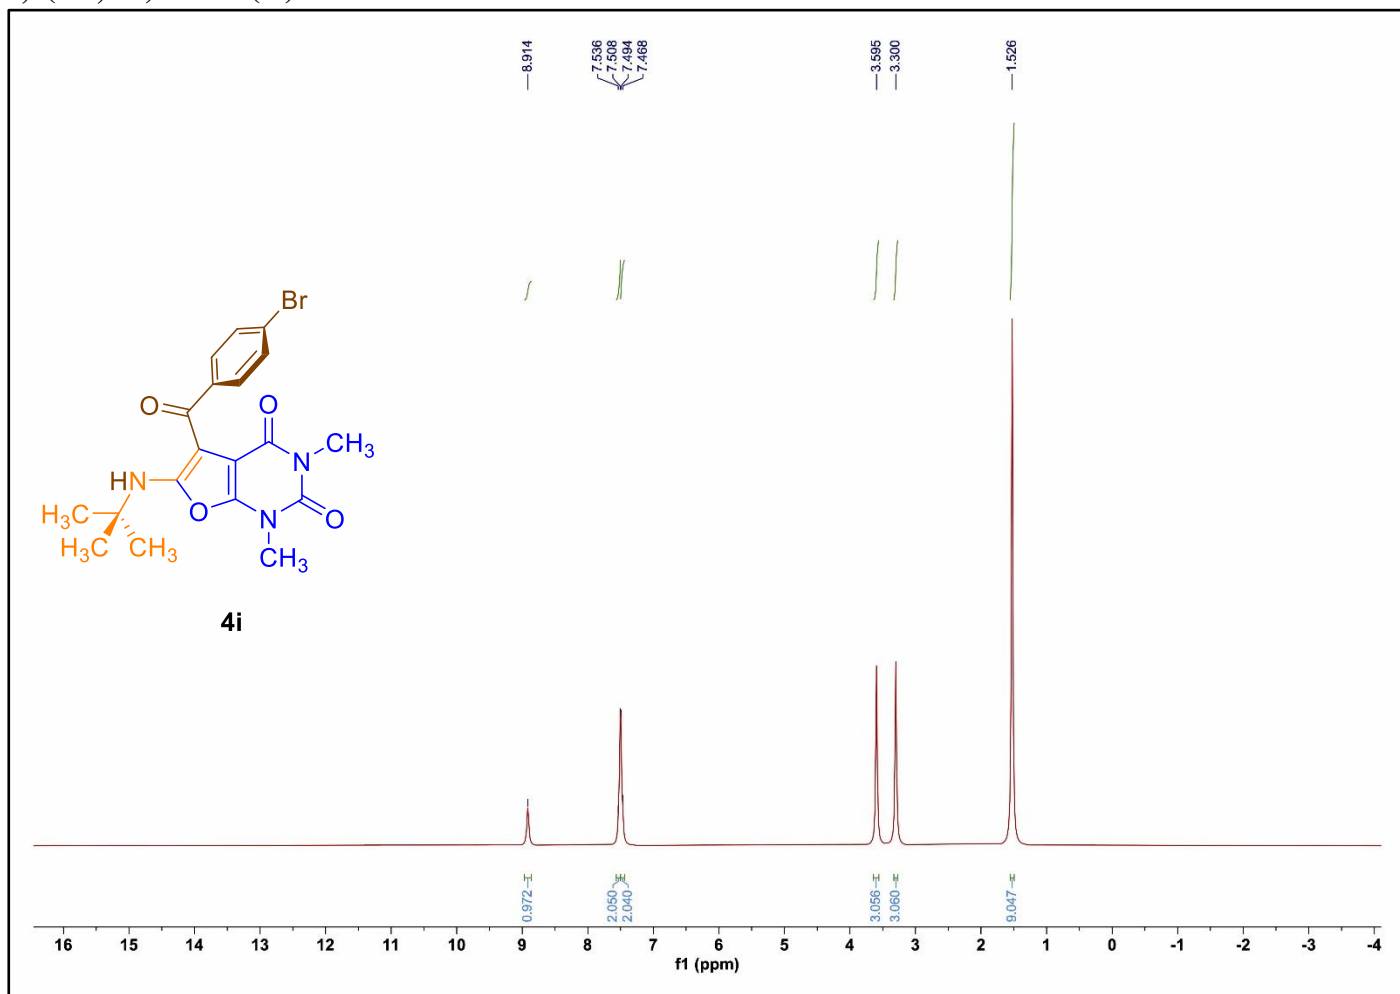

$^{13}\text{C}\{^1\text{H}\}$  NMR Spectrum of 5-(4-bromobenzoyl)-6-(*tert*-butylamino)-1,3-dimethylfuro[2,3-*d*]pyrimidine-2,4(1*H*,3*H*)-dione (4i)

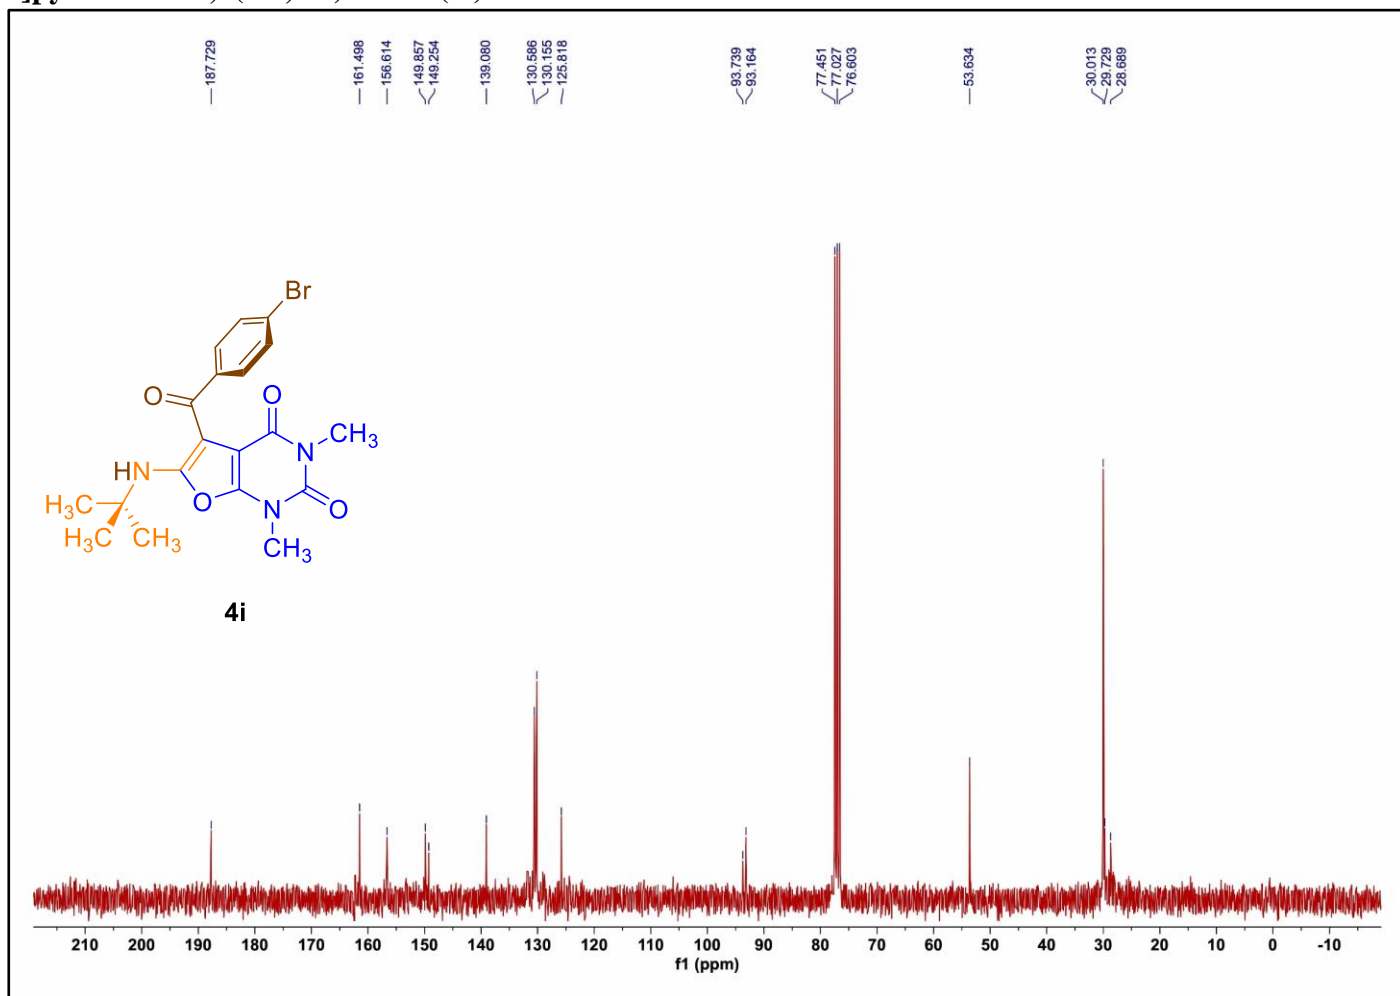

**FT-IR Spectrum of 5-(4-chlorobenzoyl)-6-(*tert*-butylamino)-1,3-dimethylfuro[2,3-*d*]pyrimidine-2,4(1*H*,3*H*)-dione (4j)**

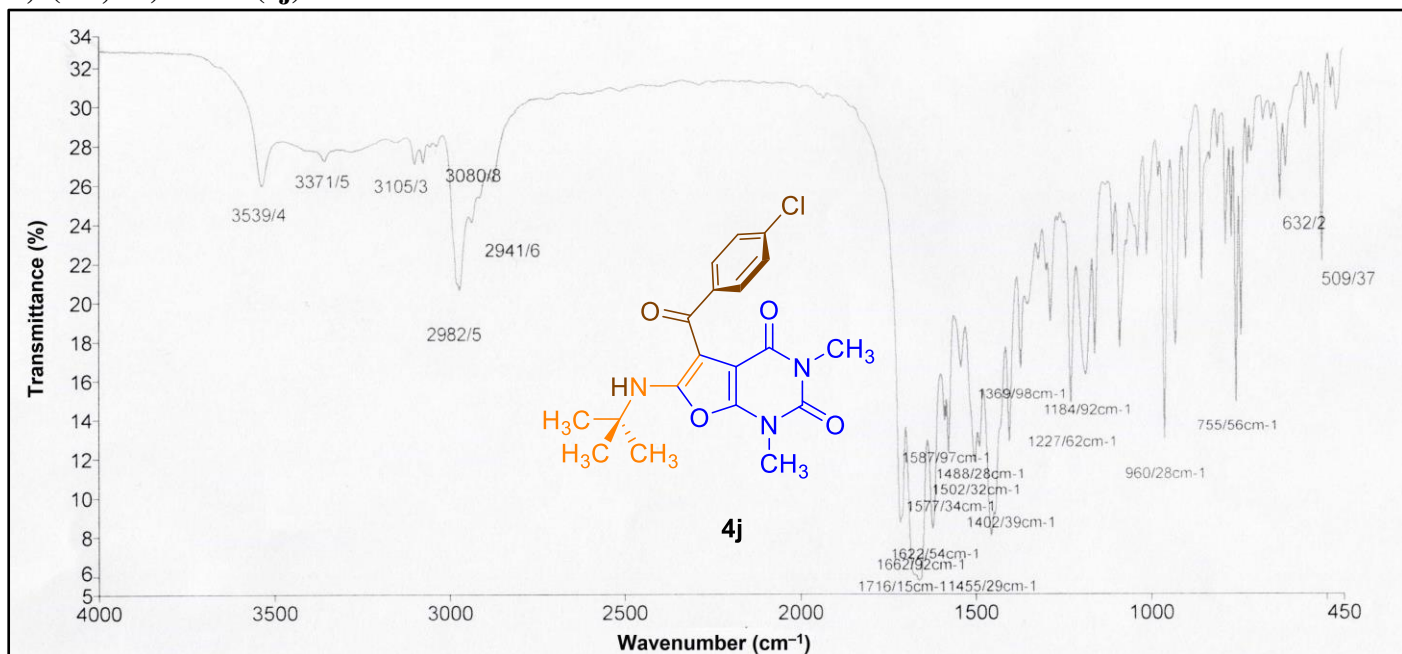

**<sup>1</sup>H NMR Spectrum of 5-(4-chlorobenzoyl)-6-(*tert*-butylamino)-1,3-dimethylfuro[2,3-*d*]pyrimidine-2,4(1*H*,3*H*)-dione (4j)**

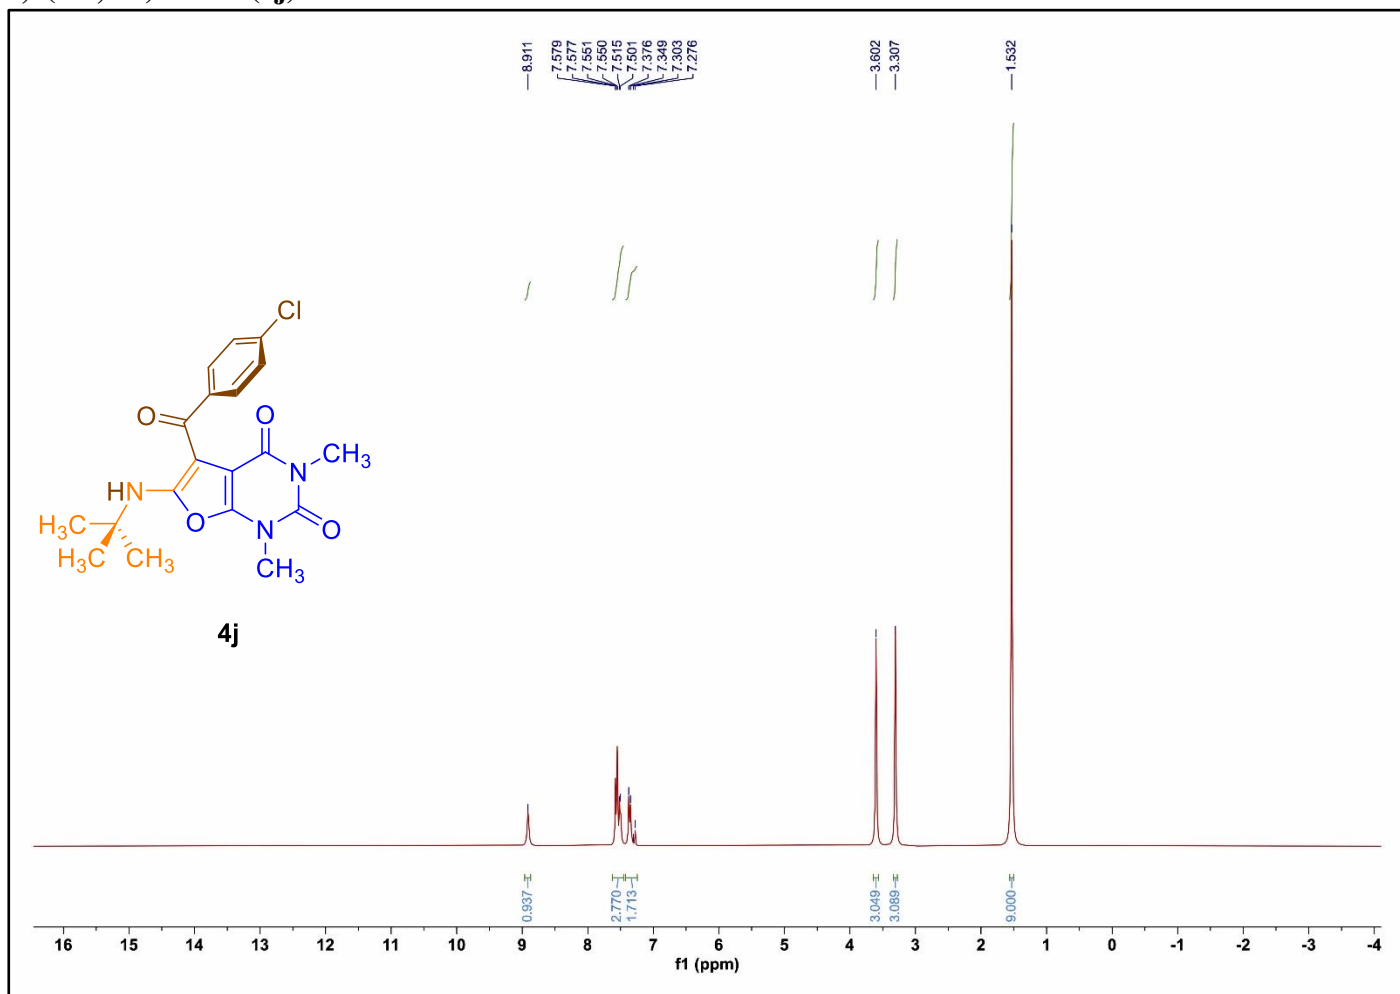

**$^{13}\text{C}\{^1\text{H}\}$  NMR Spectrum of 5-(4-chlorobenzoyl)-6-(*tert*-butylamino)-1,3-dimethylfuro[2,3-*d*]pyrimidine-2,4(1*H*,3*H*)-dione (4j)**

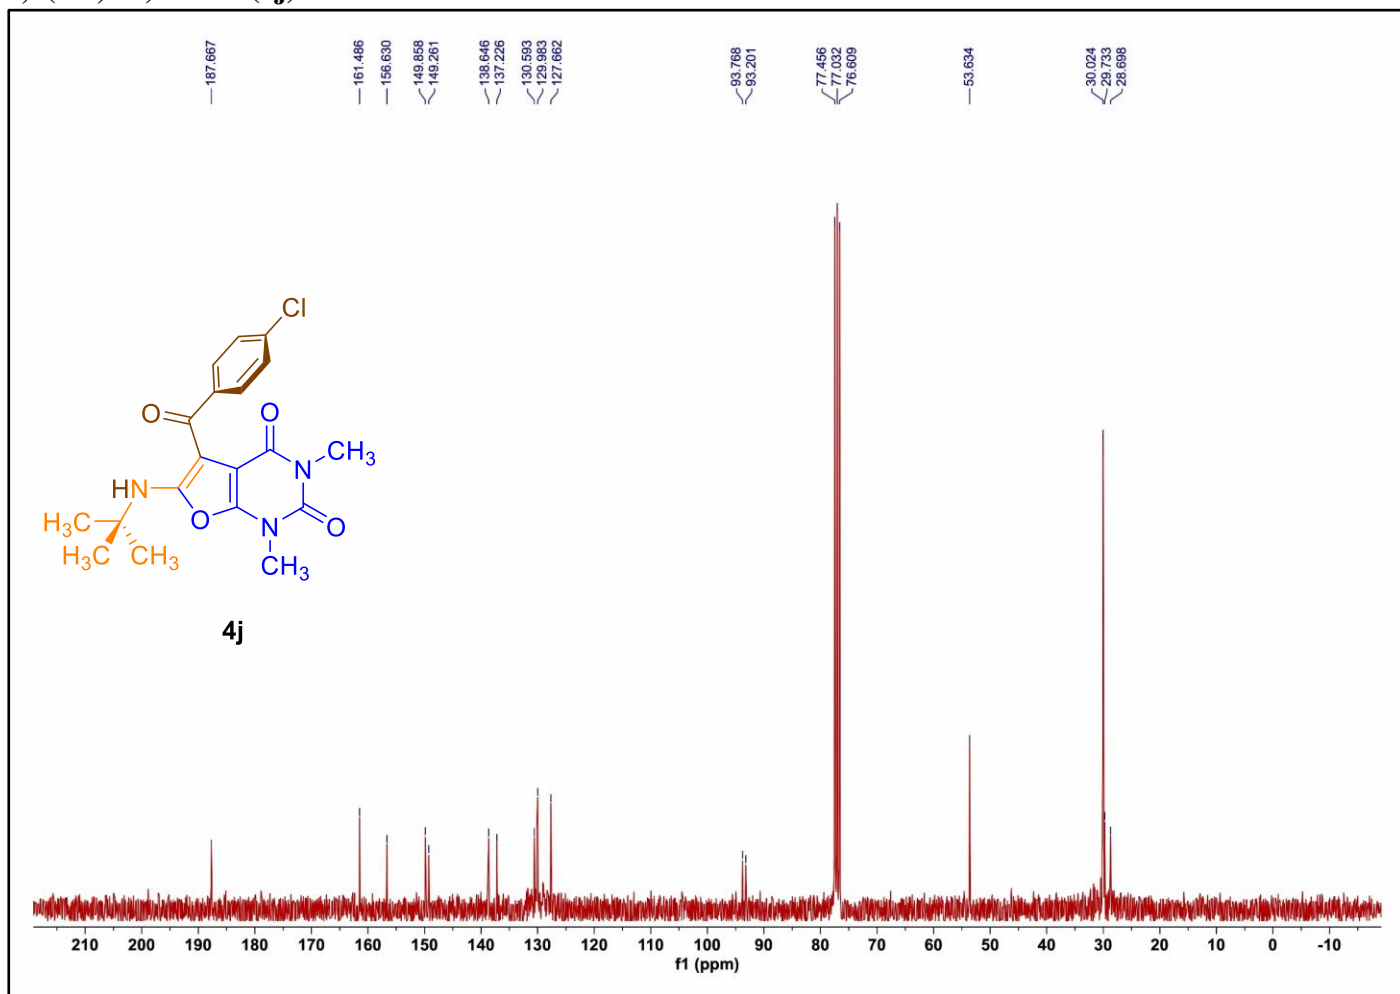

**FT-IR Spectrum of 5-(4-fluorobenzoyl)-6-(*tert*-butylamino)-1,3-dimethylfuro[2,3-*d*]pyrimidine-2,4(1*H*,3*H*)-dione (4k)**

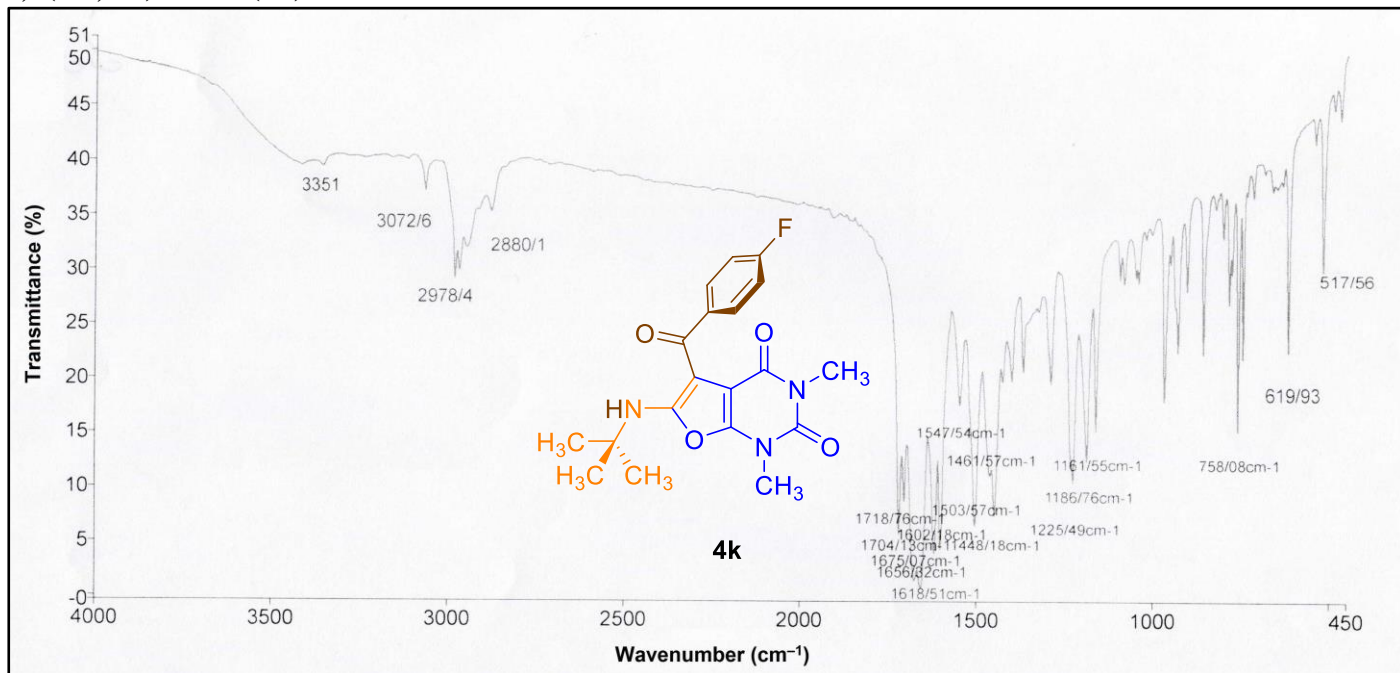

**<sup>1</sup>H NMR Spectrum of 5-(4-fluorobenzoyl)-6-(*tert*-butylamino)-1,3-dimethylfuro[2,3-*d*]pyrimidine-2,4(1*H*,3*H*)-dione (4k)**

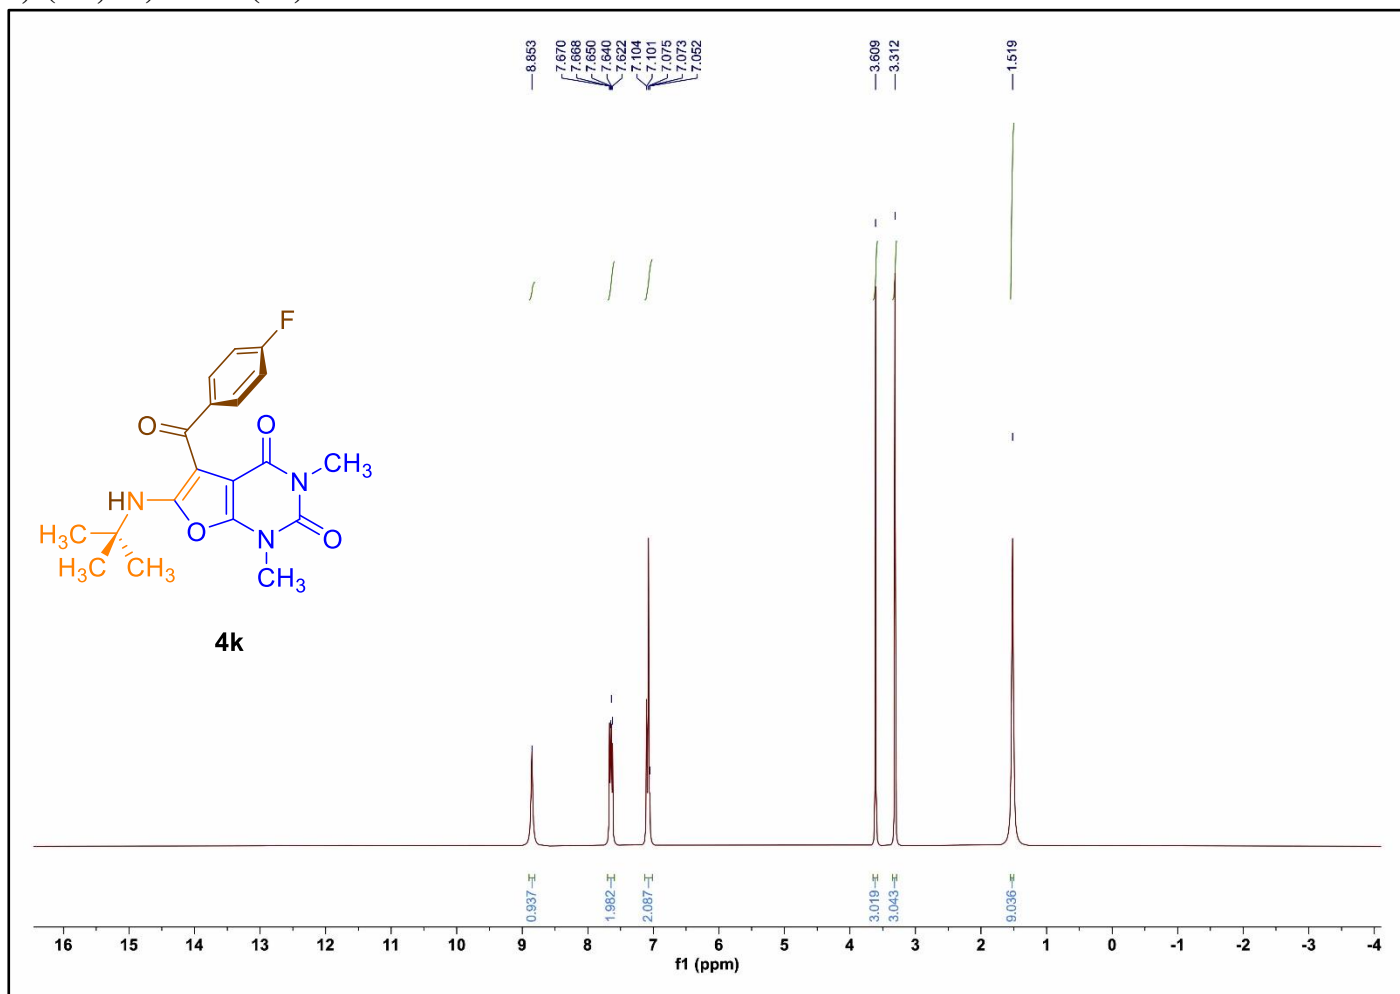

**$^{13}\text{C}\{^1\text{H}\}$  NMR Spectrum of 5-(4-fluorobenzoyl)-6-(*tert*-butylamino)-1,3-dimethylfuro[2,3-*d*]pyrimidine-2,4(1*H*,3*H*)-dione (4k)**

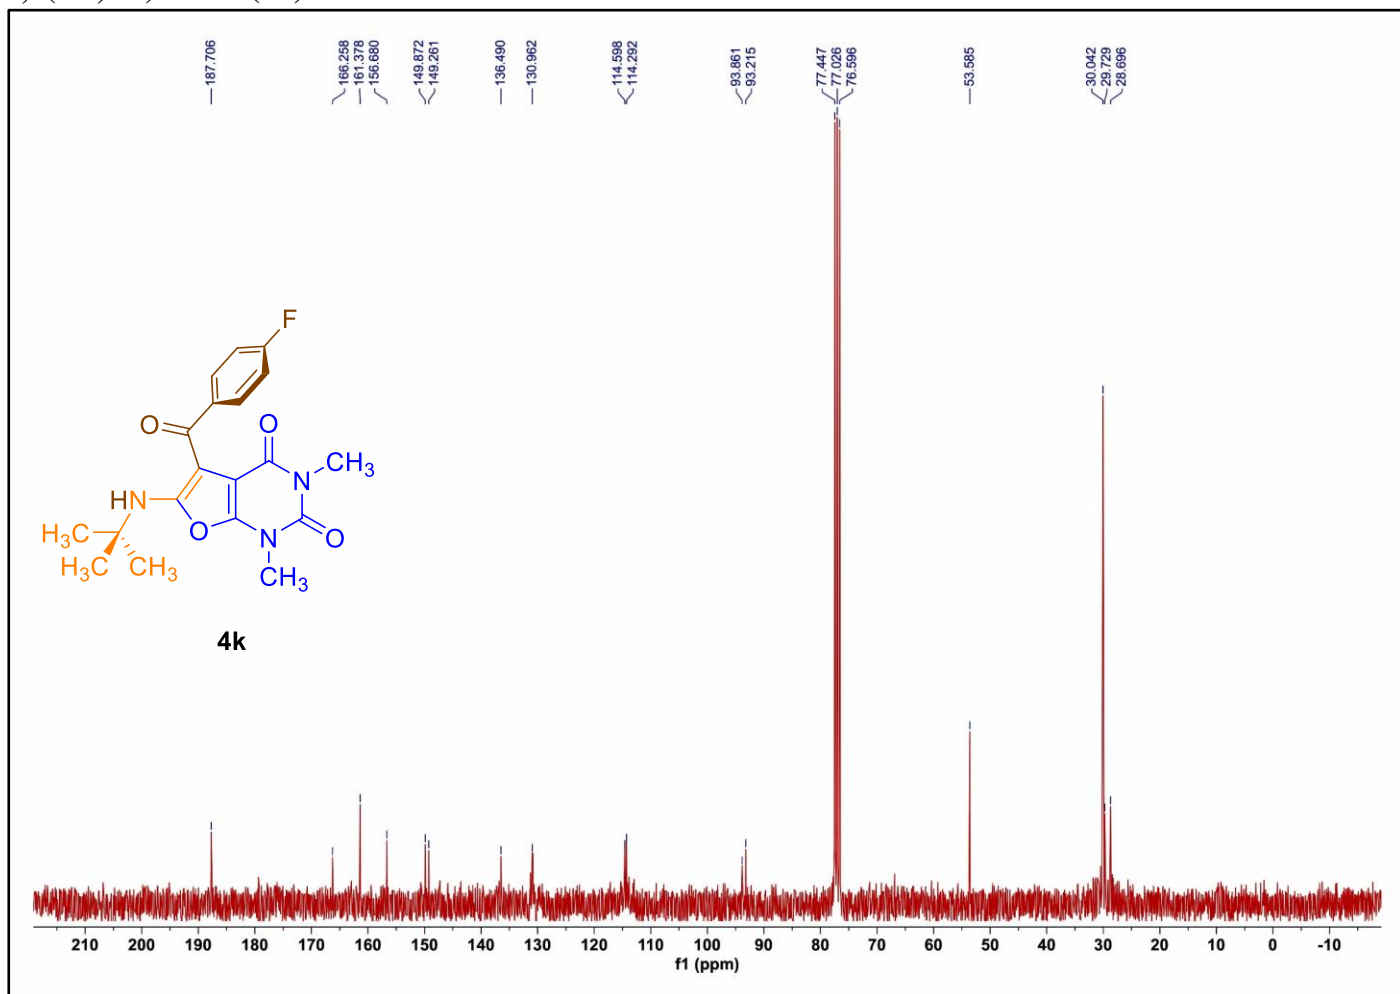



**FT-IR Spectrum of 5-(3-bromobenzoyl)-6-(*tert*-butylamino)-1,3-dimethylfuro[2,3-*d*]pyrimidine-2,4(1*H*,3*H*)-dione (4I)**

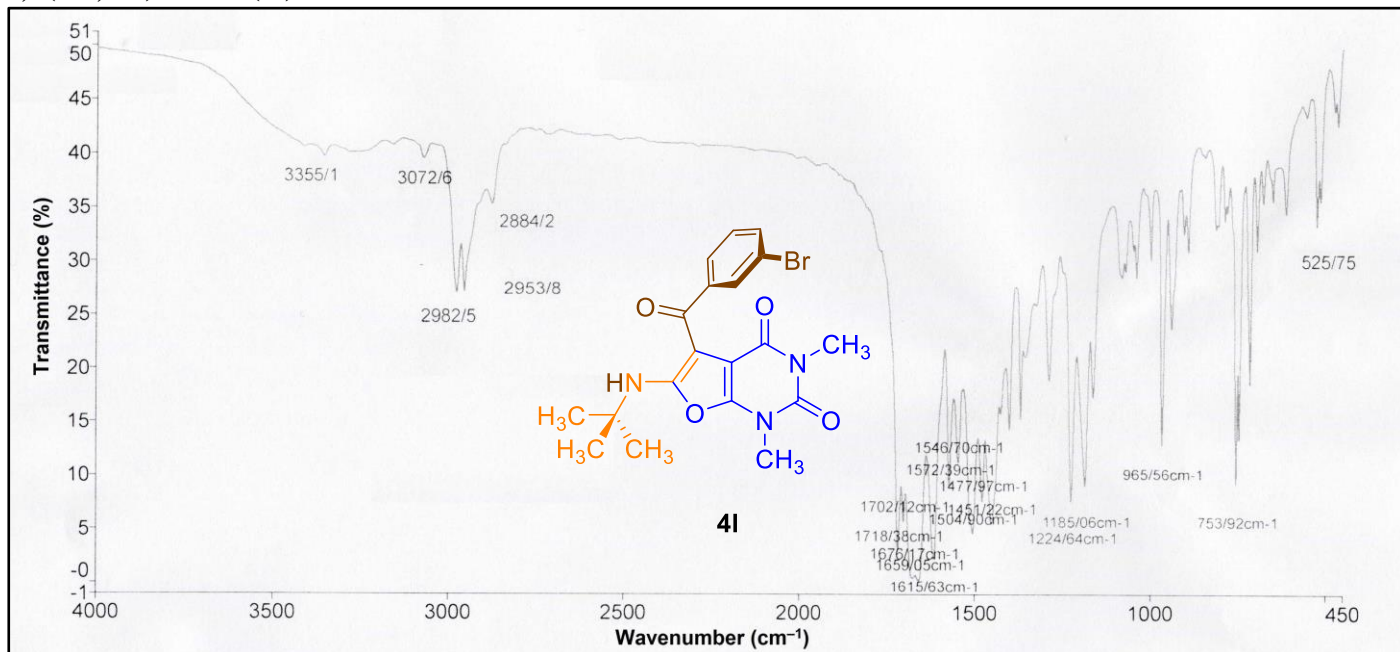

**<sup>1</sup>H NMR Spectrum of 5-(3-bromobenzoyl)-6-(*tert*-butylamino)-1,3-dimethylfuro[2,3-*d*]pyrimidine-2,4(1*H*,3*H*)-dione (4I)**

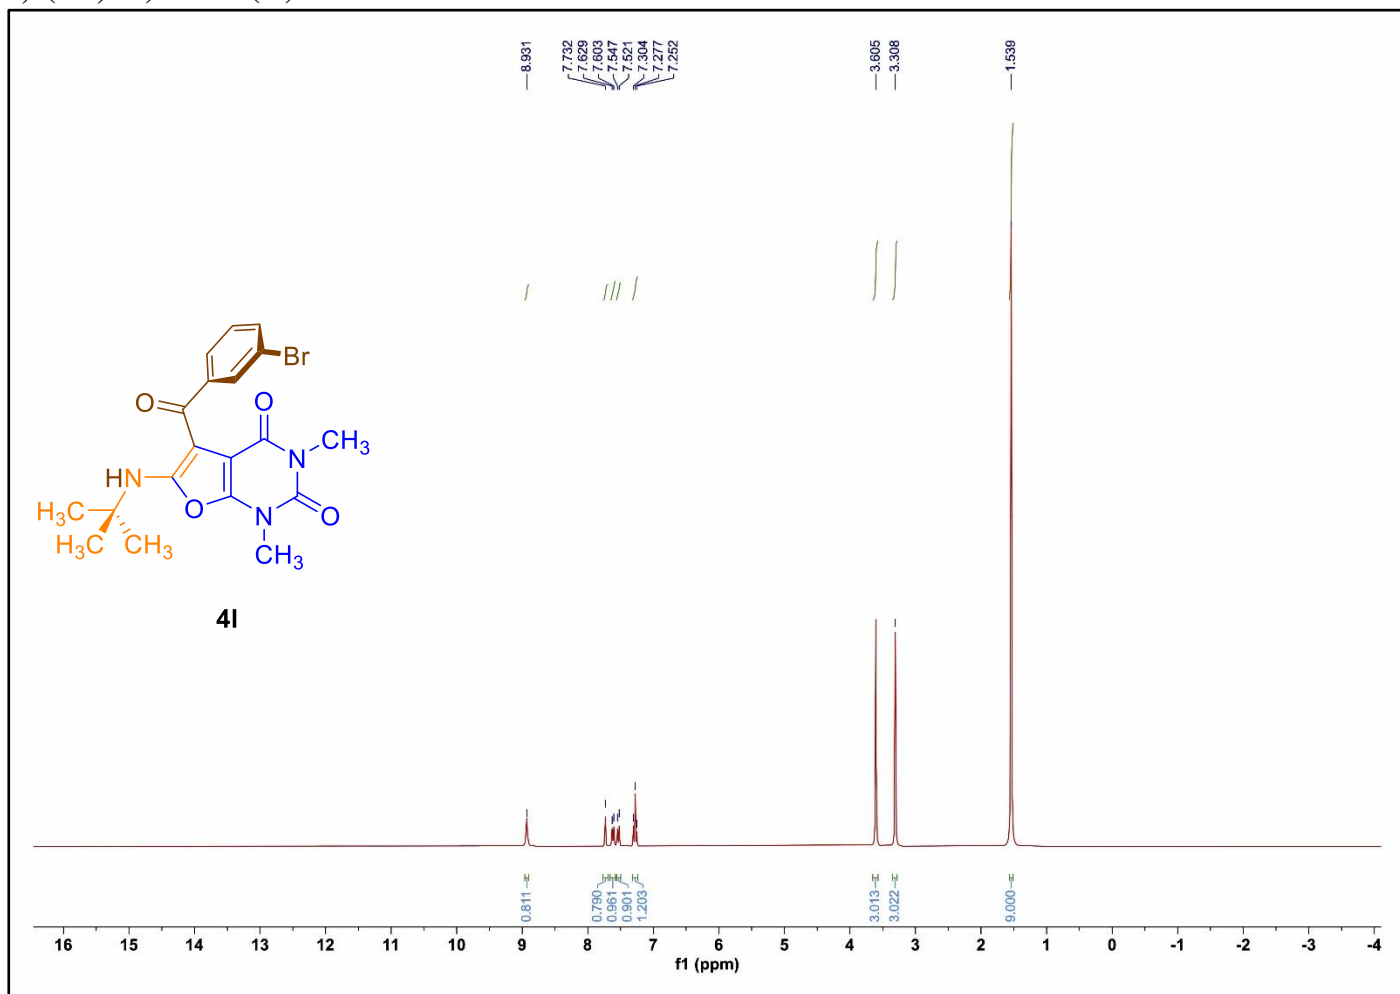

$^{13}\text{C}\{^1\text{H}\}$  NMR Spectrum of 5-(3-bromobenzoyl)-6-(*tert*-butylamino)-1,3-dimethylfuro[2,3-*d*]pyrimidine-2,4(1*H*,3*H*)-dione (4I)

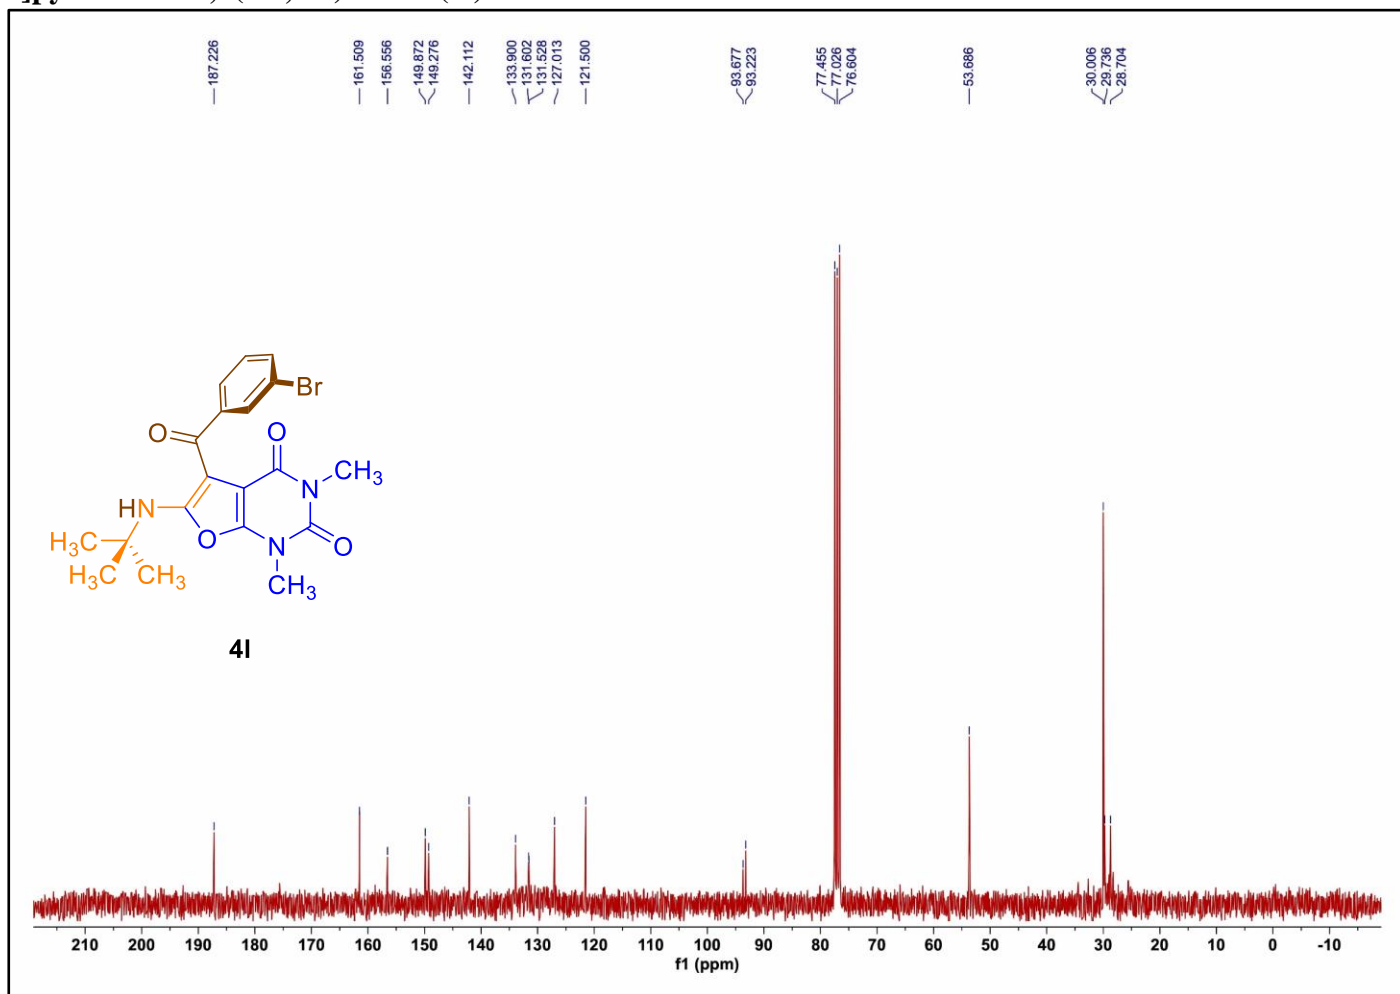

**FT-IR Spectrum of 5-(4-hydroxy-3-methoxybenzoyl)-6-(*tert*-butylamino)-1,3-dimethylfuro[2,3-*d*]pyrimidine-2,4(1*H*,3*H*)-dione (4m)**

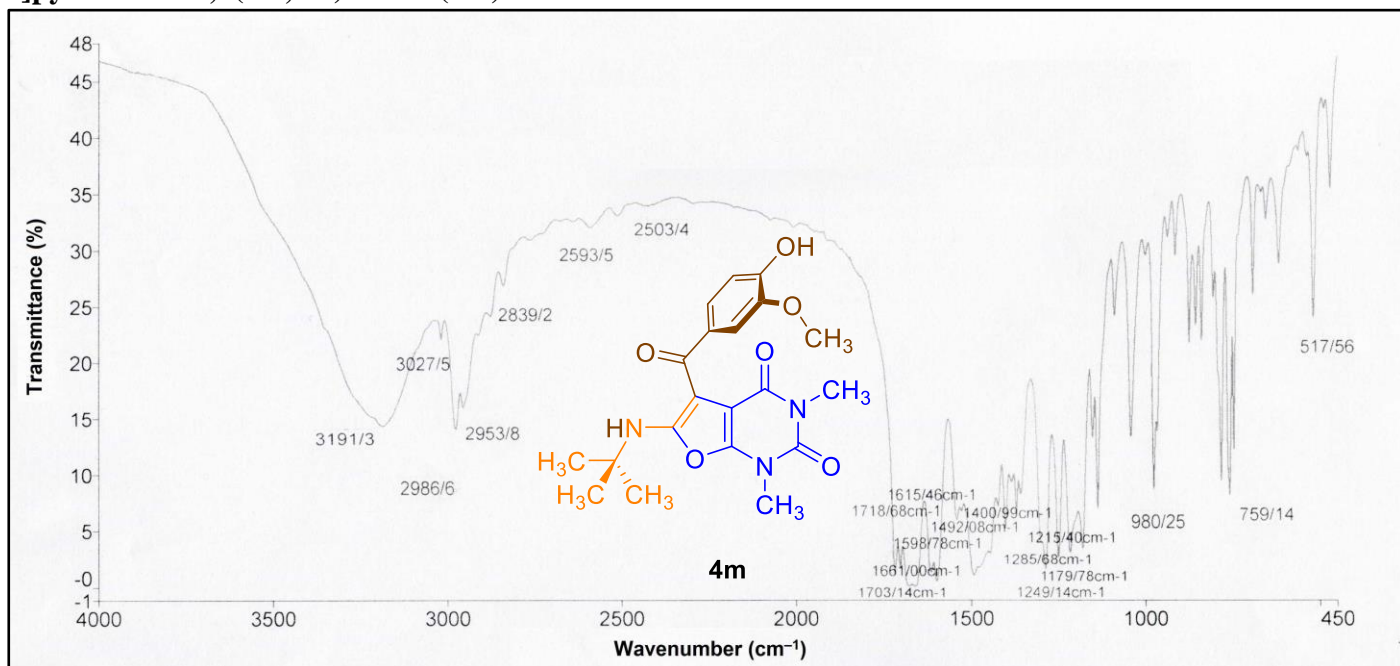

**<sup>1</sup>H NMR Spectrum of 5-(4-hydroxy-3-methoxybenzoyl)-6-(*tert*-butylamino)-1,3-dimethylfuro[2,3-*d*]pyrimidine-2,4(1*H*,3*H*)-dione (4m)**

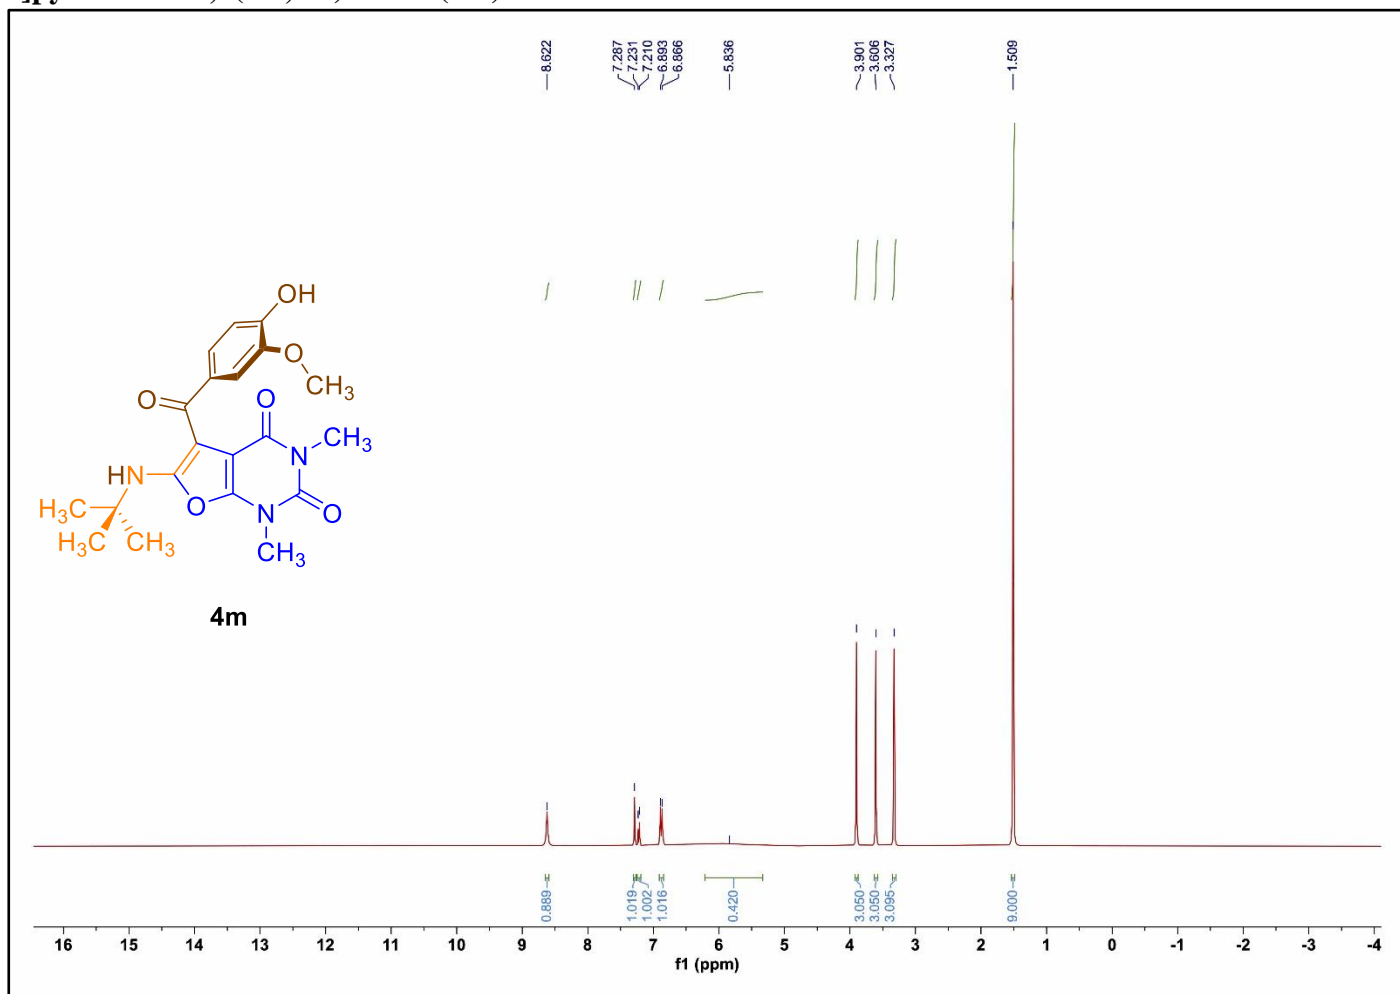

**$^{13}\text{C}\{^1\text{H}\}$  NMR Spectrum of 5-(4-hydroxy-3-methoxybenzoyl)-6-(*tert*-butylamino)-1,3-dimethylfuro[2,3-*d*]pyrimidine-2,4(1*H*,3*H*)-dione (4m)**

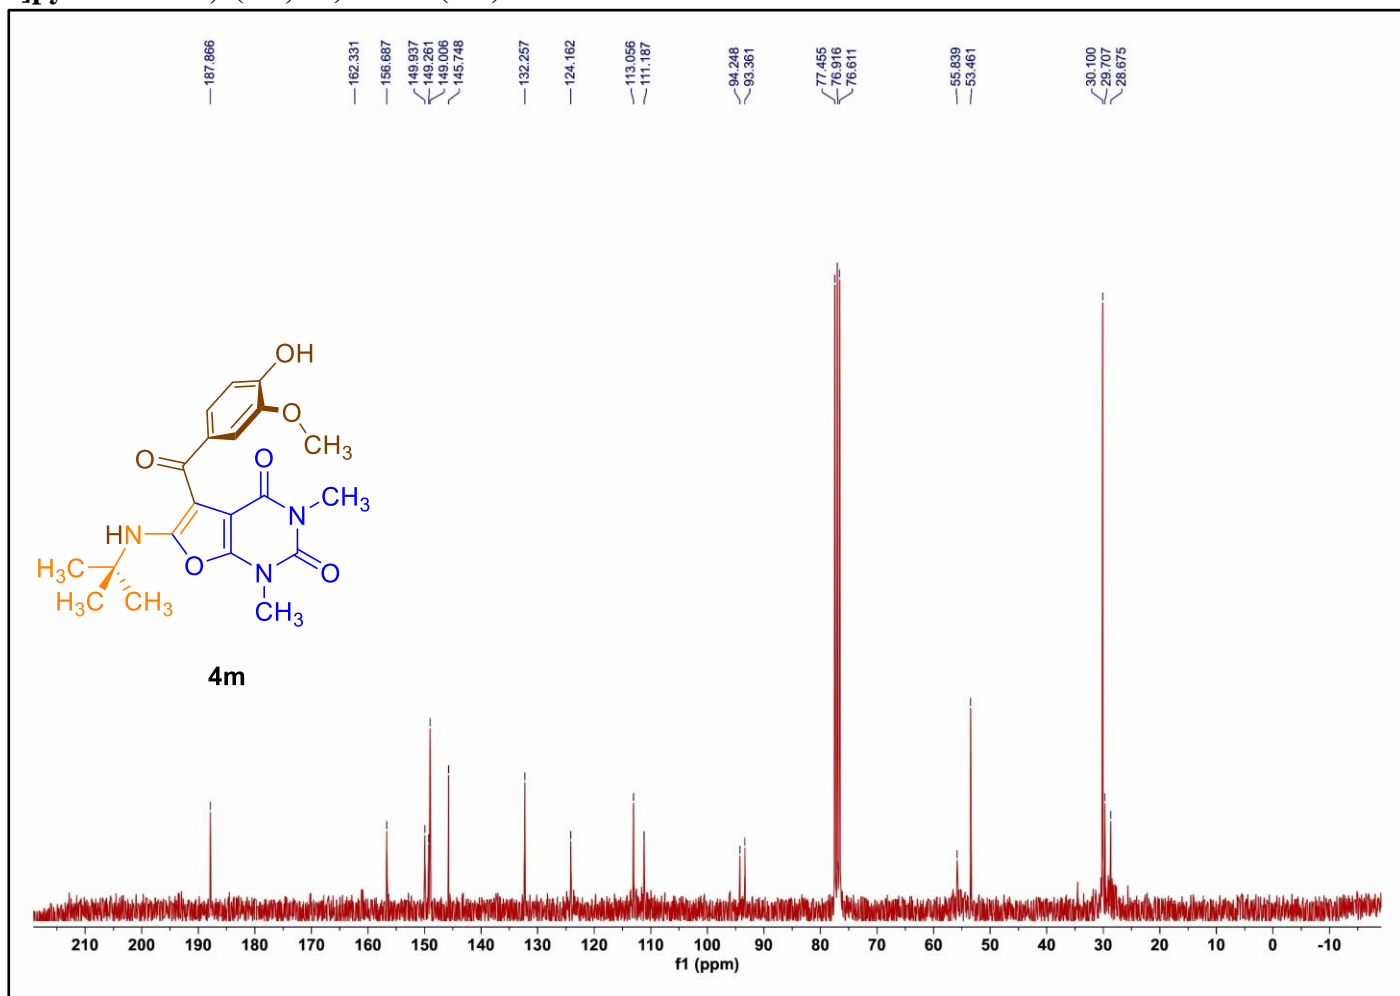

**FT-IR Spectrum of 5-(3,4-methylenedioxybenzoyl)-6-(*tert*-butylamino)-1,3-dimethylfuro[2,3-*d*]pyrimidine-2,4(1*H*,3*H*)-dione (4n)**

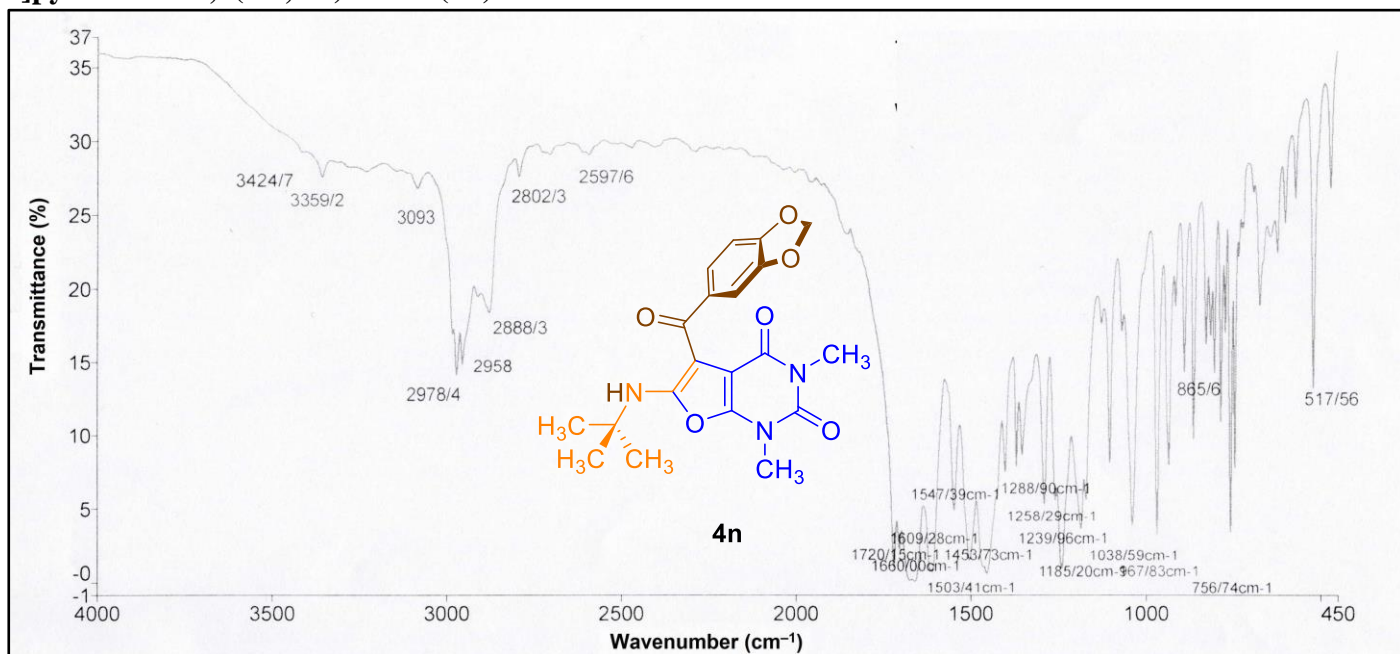

**<sup>1</sup>H NMR Spectrum of 5-(3,4-methylenedioxybenzoyl)-6-(*tert*-butylamino)-1,3-dimethylfuro[2,3-*d*]pyrimidine-2,4(1*H*,3*H*)-dione (4n)**

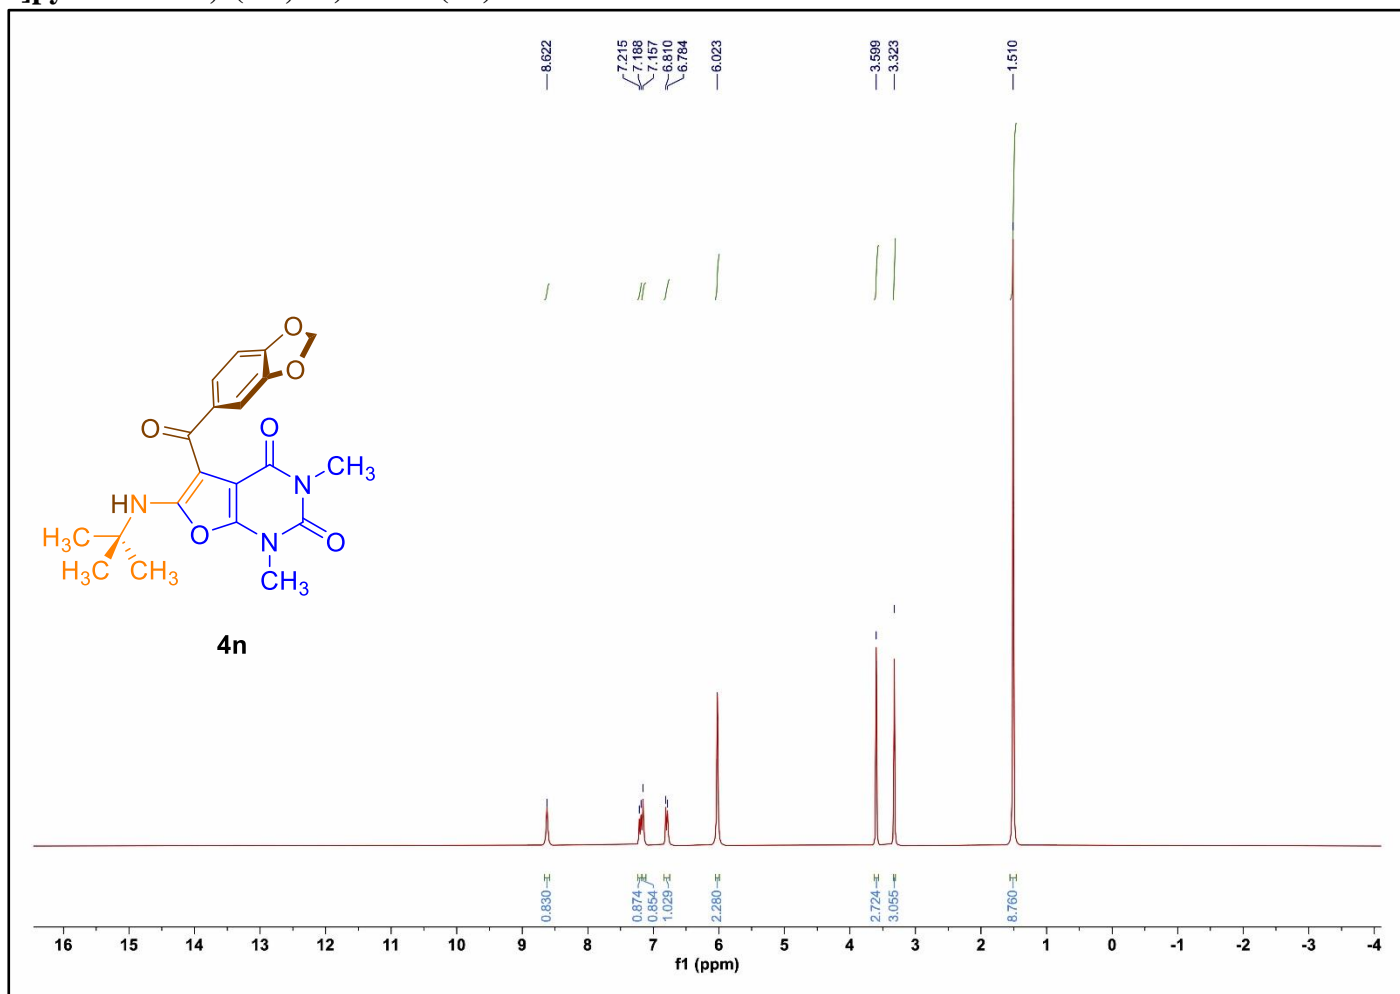



**$^{13}\text{C}\{^1\text{H}\}$  NMR Spectrum of 5-(3,4-methylenedioxybenzoyl)-6-(*tert*-butylamino)-1,3-dimethylfuro[2,3-*d*]pyrimidine-2,4(1*H*,3*H*)-dione (4n)**

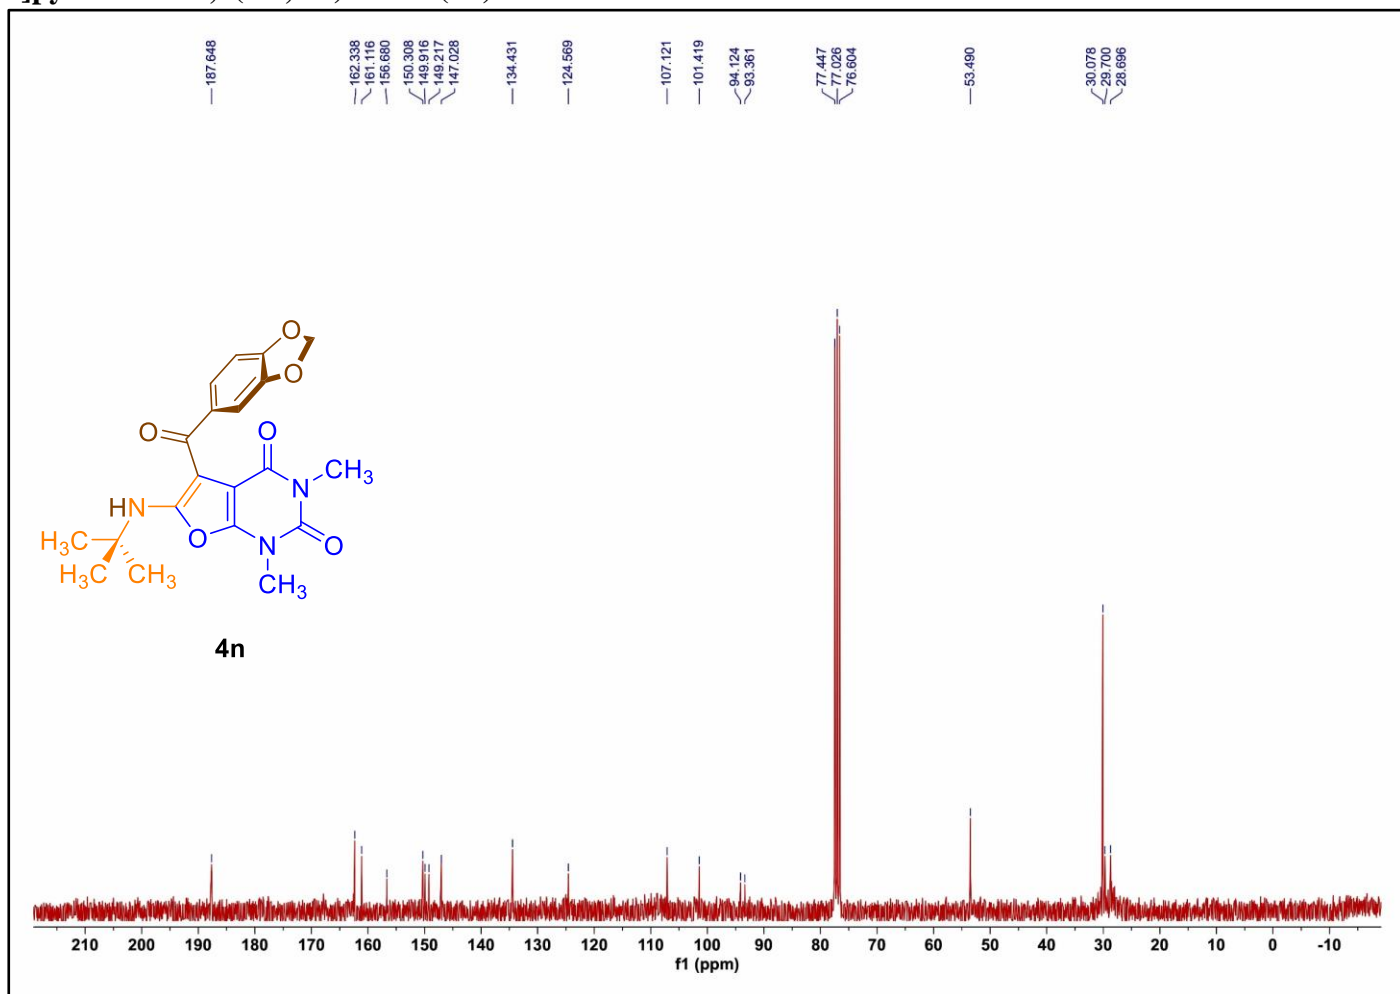

Supplement: mmc1.pdf [file mmc1.pdf]
